# Supplementary material
Source: publisher site journal article supplement (https://www.dovepress.com/article/542666)
Supplement: Supplementary file 1 [file 542666%20Revised%20supplementary%20materials.docx]

| **Supplement Table 1. Death of Inflammatory Bowel Disease among women of reproductive age at the global and regional levels between 1992 and 2021.** | | | | | | | |
| --- | --- | --- | --- | --- | --- | --- | --- |
| age_name | location_name | cause_name | 1992NUMBER | 1992RATE | 2021NUMBER | 2021RATE | EAPC |
| 15-49 years | Global | Inflammatory bowel disease | 1836.75(1195.53-2384.65) | 0.13(0.09-0.17) | 2586.76(1900.32-3125.77) | 0.13(0.10-0.16) | -0.07(-0.12--0.01) |
| 15-49 years | Low-middle SDI | Inflammatory bowel disease | 478.58(244.91-717.01) | 0.17(0.09-0.25) | 785.58(549.51-1058.95) | 0.16(0.11-0.21) | -0.35(-0.42--0.28) |
| 15-49 years | Low SDI | Inflammatory bowel disease | 298.67(142.00-476.62) | 0.25(0.12-0.41) | 740.31(434.65-978.14) | 0.27(0.16-0.36) | 0.13(0.05-0.21) |
| 15-49 years | High SDI | Inflammatory bowel disease | 303.17(285.23-317.71) | 0.13(0.12-0.14) | 327.52(315.18-343.19) | 0.13(0.13-0.14) | 0.41(0.06-0.75) |
| 15-49 years | High-middle SDI | Inflammatory bowel disease | 300.43(252.00-350.10) | 0.11(0.09-0.12) | 226.56(196.52-289.01) | 0.07(0.06-0.09) | -1.64(-1.83--1.45) |
| 15-49 years | Middle SDI | Inflammatory bowel disease | 454.15(268.20-605.34) | 0.10(0.06-0.13) | 505.17(367.97-647.04) | 0.08(0.06-0.10) | -0.63(-0.76--0.50) |
| 15-49 years | High-income North America | Inflammatory bowel disease | 101.99(99.35-105.30) | 0.13(0.13-0.14) | 170.97(161.98-180.12) | 0.20(0.19-0.21) | 1.82(1.40-2.24) |
| 15-49 years | Western Sub-Saharan Africa | Inflammatory bowel disease | 290.24(156.96-408.63) | 0.63(0.34-0.88) | 879.58(437.82-1281.71) | 0.73(0.37-1.07) | 0.61(0.52-0.70) |
| 15-49 years | Tropical Latin America | Inflammatory bowel disease | 81.52(77.53-85.91) | 0.20(0.19-0.21) | 136.40(127.15-145.29) | 0.23(0.21-0.24) | 0.81(0.51-1.12) |
| 15-49 years | Central Sub-Saharan Africa | Inflammatory bowel disease | 11.96(4.89-21.20) | 0.09(0.04-0.16) | 28.66(15.61-44.79) | 0.09(0.05-0.14) | -0.06(-0.19-0.07) |
| 15-49 years | Andean Latin America | Inflammatory bowel disease | 8.28(5.32-11.73) | 0.08(0.05-0.12) | 6.81(4.59-10.22) | 0.04(0.03-0.06) | -2.75(-3.07--2.42) |
| 15-49 years | Western Europe | Inflammatory bowel disease | 144.89(139.19-150.47) | 0.15(0.14-0.16) | 136.46(130.14-143.83) | 0.15(0.14-0.15) | 0.43(-0.10-0.97) |
| 15-49 years | Oceania | Inflammatory bowel disease | 0.31(0.15-0.49) | 0.02(0.01-0.03) | 0.59(0.31-0.94) | 0.02(0.01-0.03) | -0.37(-0.54--0.20) |
| 15-49 years | Australasia | Inflammatory bowel disease | 2.39(2.23-2.60) | 0.04(0.04-0.05) | 7.03(6.26-7.86) | 0.10(0.09-0.11) | 2.69(1.67-3.73) |
| 15-49 years | East Asia | Inflammatory bowel disease | 275.98(123.97-425.70) | 0.08(0.04-0.12) | 115.98(68.80-192.05) | 0.04(0.02-0.06) | -3.01(-3.25--2.77) |
| 15-49 years | Caribbean | Inflammatory bowel disease | 20.66(15.15-27.81) | 0.21(0.16-0.29) | 22.39(13.45-37.15) | 0.19(0.11-0.31) | -0.58(-0.79--0.36) |
| 15-49 years | Southern Sub-Saharan Africa | Inflammatory bowel disease | 15.56(9.42-20.84) | 0.11(0.07-0.15) | 21.95(11.89-34.18) | 0.10(0.05-0.16) | 0.37(-0.58-1.33) |
| 15-49 years | Eastern Europe | Inflammatory bowel disease | 121.67(112.23-133.58) | 0.22(0.20-0.24) | 92.73(81.55-106.88) | 0.19(0.17-0.22) | -1.24(-1.77--0.71) |
| 15-49 years | North Africa and Middle East | Inflammatory bowel disease | 71.22(42.98-123.94) | 0.09(0.05-0.15) | 106.21(74.24-177.81) | 0.07(0.05-0.11) | -1.04(-1.21--0.88) |
| 15-49 years | Southeast Asia | Inflammatory bowel disease | 68.67(24.34-104.91) | 0.05(0.02-0.08) | 65.10(38.29-88.18) | 0.04(0.02-0.05) | -1.80(-1.98--1.62) |
| 15-49 years | Central Europe | Inflammatory bowel disease | 43.46(39.23-50.53) | 0.14(0.13-0.16) | 29.17(25.24-33.71) | 0.11(0.10-0.13) | -0.61(-0.90--0.32) |
| 15-49 years | Central Latin America | Inflammatory bowel disease | 33.82(31.81-36.12) | 0.08(0.07-0.08) | 71.87(60.83-83.28) | 0.11(0.09-0.12) | 1.47(1.25-1.69) |
| 15-49 years | Southern Latin America | Inflammatory bowel disease | 12.57(11.52-13.70) | 0.10(0.09-0.11) | 11.86(10.90-12.95) | 0.07(0.06-0.07) | -1.15(-1.52--0.77) |
| 15-49 years | Eastern Sub-Saharan Africa | Inflammatory bowel disease | 42.55(19.87-68.63) | 0.09(0.04-0.15) | 95.84(58.35-134.92) | 0.09(0.05-0.13) | -0.24(-0.31--0.17) |
| 15-49 years | South Asia | Inflammatory bowel disease | 430.75(185.03-738.43) | 0.16(0.07-0.28) | 544.17(348.04-934.81) | 0.11(0.07-0.19) | -1.54(-1.68--1.40) |
| 15-49 years | High-income Asia Pacific | Inflammatory bowel disease | 33.20(21.26-42.79) | 0.07(0.05-0.09) | 10.13(8.07-15.81) | 0.03(0.02-0.04) | -3.48(-3.78--3.17) |
| 15-49 years | Central Asia | Inflammatory bowel disease | 25.05(20.43-28.74) | 0.15(0.12-0.17) | 32.85(27.31-39.11) | 0.14(0.11-0.16) | -0.88(-1.30--0.46) |

| **Supplement Table 2. DALYs of Inflammatory Bowel Disease among women of reproductive age at the global and regional levels between 1992 and 2021.** | | | | | | | | |
| --- | --- | --- | --- | --- | --- | --- | --- | --- |
| age_name | location_name | cause_name | metric_name | 1992-Female number | 1992-Female rate | 2021-Female number | 2021-Female rate | EAPC |
| 15-49 years | Low-middle SDI | Inflammatory bowel disease | Number | 39469.17(25409.73-55579.11) | 13.81(8.89-19.44) | 71534.08(55227.73-92083.77) | 14.13(10.91-18.19) | 0.09(0.02-0.15) |
| 15-49 years | High-middle SDI | Inflammatory bowel disease | Number | 32250.10(26123.50-39529.64) | 11.30(9.15-13.85) | 31075.70(23755.44-40083.38) | 10.18(7.79-13.14) | -0.39(-0.52--0.27) |
| 15-49 years | High SDI | Inflammatory bowel disease | Number | 74690.21(53921.92-98623.17) | 32.54(23.49-42.96) | 75867.33(53581.20-102607.88) | 31.20(22.04-42.20) | -0.13(-0.40-0.14) |
| 15-49 years | Low SDI | Inflammatory bowel disease | Number | 20468.85(11498.57-30786.44) | 17.41(9.78-26.18) | 51479.42(32931.82-65747.72) | 18.77(12.01-23.97) | 0.21(0.14-0.28) |
| 15-49 years | Global | Inflammatory bowel disease | Number | 203259.52(154006.13-257799.02) | 14.68(11.12-18.62) | 281580.36(223989.19-349965.81) | 14.45(11.49-17.96) | -0.05(-0.13-0.04) |
| 15-49 years | Middle SDI | Inflammatory bowel disease | Number | 36168.30(25165.43-46992.18) | 7.78(5.42-10.11) | 51414.65(40529.45-65064.40) | 8.31(6.55-10.52) | 0.39(0.31-0.47) |
| 15-49 years | Andean Latin America | Inflammatory bowel disease | Number | 707.28(514.90-936.99) | 7.09(5.16-9.39) | 816.31(614.50-1082.91) | 4.68(3.52-6.20) | -1.57(-1.87--1.26) |
| 15-49 years | Australasia | Inflammatory bowel disease | Number | 2056.40(1323.24-3044.29) | 37.36(24.04-55.31) | 3096.75(2079.38-4326.10) | 42.90(28.80-59.93) | 0.99(0.45-1.54) |
| 15-49 years | Caribbean | Inflammatory bowel disease | Number | 1630.41(1257.77-2067.51) | 16.97(13.09-21.52) | 1900.84(1330.29-2677.24) | 15.80(11.06-22.26) | -0.29(-0.44--0.14) |
| 15-49 years | Central Asia | Inflammatory bowel disease | Number | 2685.56(2150.73-3326.80) | 15.59(12.48-19.31) | 3924.58(3101.18-4881.47) | 16.17(12.78-20.12) | -0.20(-0.42-0.03) |
| 15-49 years | Central Europe | Inflammatory bowel disease | Number | 6508.13(4984.97-8267.55) | 20.90(16.01-26.55) | 5404.26(3991.65-7082.00) | 20.98(15.50-27.50) | 0.28(0.04-0.52) |
| 15-49 years | Central Latin America | Inflammatory bowel disease | Number | 2263.20(2075.65-2482.72) | 5.11(4.68-5.60) | 4463.41(3863.63-5133.35) | 6.55(5.67-7.53) | 1.15(0.98-1.32) |
| 15-49 years | Central Sub-Saharan Africa | Inflammatory bowel disease | Number | 970.24(553.42-1526.41) | 7.40(4.22-11.64) | 2347.44(1557.27-3342.25) | 7.19(4.77-10.24) | -0.08(-0.22-0.06) |
| 15-49 years | East Asia | Inflammatory bowel disease | Number | 18888.59(10431.47-27530.33) | 5.52(3.05-8.05) | 12413.96(8814.40-16881.74) | 3.75(2.66-5.10) | -0.86(-1.21--0.51) |
| 15-49 years | Eastern Europe | Inflammatory bowel disease | Number | 9818.98(8269.52-11473.83) | 17.71(14.92-20.70) | 8190.65(6750.33-9847.43) | 16.98(13.99-20.41) | -0.63(-1.00--0.25) |
| 15-49 years | Eastern Sub-Saharan Africa | Inflammatory bowel disease | Number | 3134.40(1791.29-4587.56) | 6.84(3.91-10.01) | 7419.91(5218.33-9805.66) | 6.93(4.87-9.16) | -0.07(-0.14--0.01) |
| 15-49 years | Global | Inflammatory bowel disease | Number | 203259.52(154006.13-257799.02) | 14.68(11.12-18.62) | 281580.36(223989.19-349965.81) | 14.45(11.49-17.96) | -0.05(-0.13-0.04) |
| 15-49 years | High-income Asia Pacific | Inflammatory bowel disease | Number | 4553.27(3327.24-5908.77) | 9.94(7.27-12.91) | 3173.41(2126.29-4355.16) | 8.34(5.59-11.45) | -0.33(-0.80-0.14) |
| 15-49 years | High-income North America | Inflammatory bowel disease | Number | 32795.46(23343.33-44098.36) | 43.35(30.86-58.29) | 35604.49(25559.11-48059.80) | 42.38(30.42-57.20) | -0.07(-0.33-0.20) |
| 15-49 years | North Africa and Middle East | Inflammatory bowel disease | Number | 8365.26(6035.71-11919.00) | 10.04(7.24-14.30) | 16984.91(12423.20-22988.88) | 10.66(7.80-14.43) | 0.25(0.21-0.30) |
| 15-49 years | Oceania | Inflammatory bowel disease | Number | 34.81(25.01-47.79) | 2.11(1.52-2.90) | 68.95(48.66-94.67) | 1.99(1.40-2.73) | -0.33(-0.44--0.22) |
| 15-49 years | South Asia | Inflammatory bowel disease | Number | 39897.93(23807.53-59514.51) | 14.97(8.93-22.33) | 67327.10(48638.08-92097.98) | 13.63(9.84-18.64) | -0.33(-0.45--0.20) |
| 15-49 years | Southeast Asia | Inflammatory bowel disease | Number | 5289.22(2684.29-7406.74) | 4.20(2.13-5.88) | 5875.95(4187.96-7533.24) | 3.21(2.29-4.11) | -1.10(-1.22--0.99) |
| 15-49 years | Southern Latin America | Inflammatory bowel disease | Number | 1828.37(1375.54-2356.98) | 14.35(10.80-18.50) | 2390.68(1670.88-3276.47) | 13.72(9.59-18.80) | -0.14(-0.27--0.01) |
| 15-49 years | Southern Sub-Saharan Africa | Inflammatory bowel disease | Number | 1175.97(814.70-1488.65) | 8.34(5.78-10.56) | 1720.81(1193.32-2400.45) | 7.93(5.50-11.06) | 0.20(-0.51-0.92) |
| 15-49 years | Tropical Latin America | Inflammatory bowel disease | Number | 5579.93(5154.57-6216.47) | 13.36(12.34-14.88) | 9582.89(8532.82-10861.45) | 15.81(14.08-17.92) | 0.80(0.54-1.07) |
| 15-49 years | Western Europe | Inflammatory bowel disease | Number | 37644.39(26873.85-49433.83) | 39.12(27.93-51.38) | 35531.38(24942.49-48405.75) | 38.13(26.77-51.95) | -0.06(-0.39-0.27) |
| 15-49 years | Western Sub-Saharan Africa | Inflammatory bowel disease | Number | 17431.72(9846.77-24254.39) | 37.54(21.21-52.23) | 53341.68(27594.79-76944.71) | 44.49(23.02-64.18) | 0.64(0.56-0.73) |

| **Supplement Table 3. Incidence Rates and Case Numbers in 2021, and Estimated Annual Percentage Changes (EAPCs) from 1992 to 2021 for Inflammatory Bowel Disease among Women of Reproductive Age at Global and Regional Levels.** | | | | | | | | | | | | | | | | | | | | |
| --- | --- | --- | --- | --- | --- | --- | --- | --- | --- | --- | --- | --- | --- | --- | --- | --- | --- | --- | --- | --- |
| measure_name | location_id | location_name | sex_id | sex_name | age_id | age_name | cause_id | cause_name | metric_id | metric_name | year | val | upper | lower | metric_name | year | val | upper | lower | EAPCs |
| Incidence | 298 | American Samoa | 2 | Female | 24 | 15-49 years | 532 | Inflammatory bowel disease | 3 | Rate | 2021 | 1.009903844 | 1.300360127 | 0.789209791 | Number | 2021 | 0.118493202 | 0.152572779 | 0.09259891 | 0.59(0.51-0.67) |
| Incidence | 105 | Antigua and Barbuda | 2 | Female | 24 | 15-49 years | 532 | Inflammatory bowel disease | 3 | Rate | 2021 | 3.957624506 | 5.198963646 | 3.134920328 | Number | 2021 | 0.956323506 | 1.256281674 | 0.757524619 | 0.71(0.61-0.80) |
| Incidence | 141 | Arab Republic of Egypt | 2 | Female | 24 | 15-49 years | 532 | Inflammatory bowel disease | 3 | Rate | 2021 | 5.206981975 | 6.799801756 | 4.051316553 | Number | 2021 | 1351.093165 | 1764.3936 | 1051.224323 | 0.90(0.82-0.98) |
| Incidence | 97 | Argentine Republic | 2 | Female | 24 | 15-49 years | 532 | Inflammatory bowel disease | 3 | Rate | 2021 | 6.370694701 | 8.229904116 | 5.044469654 | Number | 2021 | 757.2401499 | 978.2314362 | 599.6010069 | 0.27(0.21-0.33) |
| Incidence | 71 | Australia | 2 | Female | 24 | 15-49 years | 532 | Inflammatory bowel disease | 3 | Rate | 2021 | 26.70664716 | 33.40973712 | 21.63596536 | Number | 2021 | 1608.897457 | 2012.713942 | 1303.422681 | 0.78(0.41-1.15) |
| Incidence | 107 | Barbados | 2 | Female | 24 | 15-49 years | 532 | Inflammatory bowel disease | 3 | Rate | 2021 | 4.797871255 | 6.476037147 | 3.691758715 | Number | 2021 | 3.415554815 | 4.610223719 | 2.628124763 | 0.54(0.33-0.75) |
| Incidence | 108 | Belize | 2 | Female | 24 | 15-49 years | 532 | Inflammatory bowel disease | 3 | Rate | 2021 | 3.718603593 | 4.880773624 | 3.000135428 | Number | 2021 | 4.491758553 | 5.895561632 | 3.623909791 | 0.87(0.82-0.92) |
| Incidence | 305 | Bermuda | 2 | Female | 24 | 15-49 years | 532 | Inflammatory bowel disease | 3 | Rate | 2021 | 4.252408495 | 5.443640214 | 3.365295421 | Number | 2021 | 0.573311973 | 0.733914467 | 0.453710917 | 0.63(0.56-0.70) |
| Incidence | 133 | Bolivarian Republic of Venezuela | 2 | Female | 24 | 15-49 years | 532 | Inflammatory bowel disease | 3 | Rate | 2021 | 1.127214644 | 1.518131323 | 0.84827165 | Number | 2021 | 77.36923988 | 104.2007989 | 58.22327906 | 0.37(0.17-0.57) |
| Incidence | 44 | Bosnia and Herzegovina | 2 | Female | 24 | 15-49 years | 532 | Inflammatory bowel disease | 3 | Rate | 2021 | 7.650258605 | 9.836174232 | 6.019299249 | Number | 2021 | 55.96964742 | 71.96190771 | 44.03747299 | 1.14(0.91-1.37) |
| Incidence | 66 | Brunei Darussalam | 2 | Female | 24 | 15-49 years | 532 | Inflammatory bowel disease | 3 | Rate | 2021 | 1.288535228 | 1.69290205 | 0.998574539 | Number | 2021 | 1.609879543 | 2.115090314 | 1.247606343 | 0.38(0.32-0.44) |
| Incidence | 201 | Burkina Faso | 2 | Female | 24 | 15-49 years | 532 | Inflammatory bowel disease | 3 | Rate | 2021 | 1.361327948 | 1.758132688 | 1.075375095 | Number | 2021 | 74.77553213 | 96.57137174 | 59.06860657 | -0.10(-0.15--0.04) |
| Incidence | 101 | Canada | 2 | Female | 24 | 15-49 years | 532 | Inflammatory bowel disease | 3 | Rate | 2021 | 39.42384807 | 47.6137904 | 32.26277937 | Number | 2021 | 3269.786414 | 3949.054508 | 2675.852379 | -0.59(-0.85--0.34) |
| Incidence | 169 | Central African Republic | 2 | Female | 24 | 15-49 years | 532 | Inflammatory bowel disease | 3 | Rate | 2021 | 1.705579164 | 2.203964071 | 1.343191599 | Number | 2021 | 23.59598743 | 30.49093798 | 18.58250426 | 0.36(0.32-0.39) |
| Incidence | 110 | Commonwealth of Dominica | 2 | Female | 24 | 15-49 years | 532 | Inflammatory bowel disease | 3 | Rate | 2021 | 4.172170814 | 5.334214037 | 3.272234572 | Number | 2021 | 0.685782008 | 0.876787691 | 0.537858994 | 0.66(0.47-0.84) |
| Incidence | 106 | Commonwealth of the Bahamas | 2 | Female | 24 | 15-49 years | 532 | Inflammatory bowel disease | 3 | Rate | 2021 | 4.559245537 | 5.938562858 | 3.654548394 | Number | 2021 | 4.915756764 | 6.402930112 | 3.940316625 | 0.83(0.74-0.92) |
| Incidence | 320 | Cook Islands | 2 | Female | 24 | 15-49 years | 532 | Inflammatory bowel disease | 3 | Rate | 2021 | 1.067336474 | 1.368103574 | 0.85420108 | Number | 2021 | 0.045972891 | 0.058927693 | 0.036792609 | 1.02(0.90-1.13) |
| Incidence | 47 | Czech Republic | 2 | Female | 24 | 15-49 years | 532 | Inflammatory bowel disease | 3 | Rate | 2021 | 28.14711097 | 34.61092791 | 22.91977308 | Number | 2021 | 645.6666161 | 793.9401215 | 525.7567051 | 1.24(0.87-1.61) |
| Incidence | 7 | Democratic People's Republic of Korea | 2 | Female | 24 | 15-49 years | 532 | Inflammatory bowel disease | 3 | Rate | 2021 | 1.250975542 | 1.59345753 | 0.987033172 | Number | 2021 | 82.43738153 | 105.0064225 | 65.04398161 | 0.68(0.65-0.70) |
| Incidence | 215 | Democratic Republic of Sao Tome and Principe | 2 | Female | 24 | 15-49 years | 532 | Inflammatory bowel disease | 3 | Rate | 2021 | 1.507536462 | 1.953357657 | 1.203747103 | Number | 2021 | 0.84561058 | 1.095681559 | 0.675208403 | 0.68(0.54-0.82) |
| Incidence | 171 | Democratic Republic of the Congo | 2 | Female | 24 | 15-49 years | 532 | Inflammatory bowel disease | 3 | Rate | 2021 | 1.784662953 | 2.33902348 | 1.430379753 | Number | 2021 | 380.2668011 | 498.3870904 | 304.7779595 | 0.93(0.89-0.97) |
| Incidence | 19 | Democratic Republic of Timor-Leste | 2 | Female | 24 | 15-49 years | 532 | Inflammatory bowel disease | 3 | Rate | 2021 | 0.767767028 | 0.994108238 | 0.615868226 | Number | 2021 | 2.65809875 | 3.441718345 | 2.132207432 | 0.70(0.64-0.76) |
| Incidence | 17 | Democratic Socialist Republic of Sri Lanka | 2 | Female | 24 | 15-49 years | 532 | Inflammatory bowel disease | 3 | Rate | 2021 | 1.142032827 | 1.456306377 | 0.905726213 | Number | 2021 | 64.49189541 | 82.23928096 | 51.14739156 | 1.37(0.96-1.79) |
| Incidence | 111 | Dominican Republic | 2 | Female | 24 | 15-49 years | 532 | Inflammatory bowel disease | 3 | Rate | 2021 | 3.621904453 | 4.635576945 | 2.891470701 | Number | 2021 | 104.9198598 | 134.2840733 | 83.76054765 | 0.82(0.73-0.91) |
| Incidence | 99 | Eastern Republic of Uruguay | 2 | Female | 24 | 15-49 years | 532 | Inflammatory bowel disease | 3 | Rate | 2021 | 6.149983342 | 8.101242208 | 4.868375685 | Number | 2021 | 51.19093935 | 67.43273525 | 40.52315438 | 0.91(0.88-0.94) |
| Incidence | 179 | Federal Democratic Republic of Ethiopia | 2 | Female | 24 | 15-49 years | 532 | Inflammatory bowel disease | 3 | Rate | 2021 | 1.436686469 | 1.830707153 | 1.150710887 | Number | 2021 | 398.236749 | 507.4557884 | 318.9668535 | 0.85(0.77-0.94) |
| Incidence | 164 | Federal Democratic Republic of Nepal | 2 | Female | 24 | 15-49 years | 532 | Inflammatory bowel disease | 3 | Rate | 2021 | 6.236472055 | 8.099977725 | 4.893018218 | Number | 2021 | 565.7291589 | 734.7733695 | 443.860416 | 0.93(0.86-1.00) |
| Incidence | 81 | Federal Republic of Germany | 2 | Female | 24 | 15-49 years | 532 | Inflammatory bowel disease | 3 | Rate | 2021 | 26.99758025 | 33.67456369 | 21.59225129 | Number | 2021 | 4597.882471 | 5735.020867 | 3677.315996 | 0.88(0.45-1.32) |
| Incidence | 214 | Federal Republic of Nigeria | 2 | Female | 24 | 15-49 years | 532 | Inflammatory bowel disease | 3 | Rate | 2021 | 1.363082659 | 1.727260934 | 1.100815106 | Number | 2021 | 782.6925044 | 991.8064595 | 632.0964665 | 0.22(0.14-0.30) |
| Incidence | 187 | Federal Republic of Somalia | 2 | Female | 24 | 15-49 years | 532 | Inflammatory bowel disease | 3 | Rate | 2021 | 1.263582394 | 1.617844005 | 1.008420052 | Number | 2021 | 61.11229549 | 78.24591526 | 48.77154388 | 0.24(0.16-0.32) |
| Incidence | 25 | Federated States of Micronesia | 2 | Female | 24 | 15-49 years | 532 | Inflammatory bowel disease | 3 | Rate | 2021 | 1.000172482 | 1.290799808 | 0.776207851 | Number | 2021 | 0.261544151 | 0.33754292 | 0.202977613 | 0.79(0.74-0.84) |
| Incidence | 135 | Federative Republic of Brazil | 2 | Female | 24 | 15-49 years | 532 | Inflammatory bowel disease | 3 | Rate | 2021 | 3.277747184 | 4.213378443 | 2.587995938 | Number | 2021 | 1924.557353 | 2473.921267 | 1519.563997 | 0.94(0.35-1.53) |
| Incidence | 80 | French Republic | 2 | Female | 24 | 15-49 years | 532 | Inflammatory bowel disease | 3 | Rate | 2021 | 14.66171158 | 18.0562426 | 11.95029024 | Number | 2021 | 2081.572519 | 2563.505508 | 1696.622909 | -0.24(-0.49-0.01) |
| Incidence | 173 | Gabonese Republic | 2 | Female | 24 | 15-49 years | 532 | Inflammatory bowel disease | 3 | Rate | 2021 | 2.057156503 | 2.631674419 | 1.637732493 | Number | 2021 | 10.07111713 | 12.88375546 | 8.0177642 | 0.88(0.85-0.91) |
| Incidence | 35 | Georgia | 2 | Female | 24 | 15-49 years | 532 | Inflammatory bowel disease | 3 | Rate | 2021 | 6.112558195 | 7.701125093 | 4.834116945 | Number | 2021 | 48.1039287 | 60.60545529 | 38.04299434 | 0.47(0.44-0.50) |
| Incidence | 87 | Grand Duchy of Luxembourg | 2 | Female | 24 | 15-49 years | 532 | Inflammatory bowel disease | 3 | Rate | 2021 | 16.75080575 | 21.31350191 | 13.57651438 | Number | 2021 | 26.07843639 | 33.18185479 | 21.1365514 | -0.20(-0.28--0.13) |
| Incidence | 349 | Greenland | 2 | Female | 24 | 15-49 years | 532 | Inflammatory bowel disease | 3 | Rate | 2021 | 34.15690857 | 41.93006066 | 28.47141159 | Number | 2021 | 4.347529541 | 5.336905037 | 3.623873125 | 0.34(0.28-0.39) |
| Incidence | 112 | Grenada | 2 | Female | 24 | 15-49 years | 532 | Inflammatory bowel disease | 3 | Rate | 2021 | 4.209607553 | 5.328771405 | 3.354978046 | Number | 2021 | 1.078291626 | 1.36496562 | 0.859378146 | 1.13(1.08-1.19) |
| Incidence | 351 | Guam | 2 | Female | 24 | 15-49 years | 532 | Inflammatory bowel disease | 3 | Rate | 2021 | 1.132237912 | 1.446323896 | 0.894954531 | Number | 2021 | 0.408494905 | 0.521812541 | 0.322886526 | 0.74(0.64-0.84) |
| Incidence | 144 | Hashemite Kingdom of Jordan | 2 | Female | 24 | 15-49 years | 532 | Inflammatory bowel disease | 3 | Rate | 2021 | 4.06161305 | 5.2643148 | 3.264185 | Number | 2021 | 125.8698413 | 163.1417026 | 101.1574571 | 1.27(1.12-1.41) |
| Incidence | 82 | Hellenic Republic | 2 | Female | 24 | 15-49 years | 532 | Inflammatory bowel disease | 3 | Rate | 2021 | 5.372259717 | 6.845645727 | 4.332740205 | Number | 2021 | 116.4461378 | 148.3824401 | 93.91408633 | 1.11(0.50-1.73) |
| Incidence | 48 | Hungary | 2 | Female | 24 | 15-49 years | 532 | Inflammatory bowel disease | 3 | Rate | 2021 | 21.48337423 | 26.24981581 | 17.47075363 | Number | 2021 | 459.4998852 | 561.4475278 | 373.6754386 | 0.55(0.16-0.95) |
| Incidence | 26 | Independent State of Papua New Guinea | 2 | Female | 24 | 15-49 years | 532 | Inflammatory bowel disease | 3 | Rate | 2021 | 0.838192883 | 1.104358816 | 0.651296675 | Number | 2021 | 21.92886695 | 28.89232063 | 17.03927392 | 0.62(0.61-0.64) |
| Incidence | 27 | Independent State of Samoa | 2 | Female | 24 | 15-49 years | 532 | Inflammatory bowel disease | 3 | Rate | 2021 | 0.858747774 | 1.112313168 | 0.675575464 | Number | 2021 | 0.417796994 | 0.541161342 | 0.328680209 | 0.64(0.57-0.71) |
| Incidence | 84 | Ireland | 2 | Female | 24 | 15-49 years | 532 | Inflammatory bowel disease | 3 | Rate | 2021 | 19.31315265 | 24.12275348 | 15.5812705 | Number | 2021 | 225.3282995 | 281.4423476 | 181.7880927 | 0.42(0.31-0.53) |
| Incidence | 160 | Islamic Republic of Afghanistan | 2 | Female | 24 | 15-49 years | 532 | Inflammatory bowel disease | 3 | Rate | 2021 | 3.296519123 | 4.177569376 | 2.626773072 | Number | 2021 | 237.1941862 | 300.5883271 | 189.0040002 | 0.76(0.72-0.80) |
| Incidence | 142 | Islamic Republic of Iran | 2 | Female | 24 | 15-49 years | 532 | Inflammatory bowel disease | 3 | Rate | 2021 | 3.580040414 | 4.693841657 | 2.787221721 | Number | 2021 | 832.1962044 | 1091.104222 | 647.9019979 | 1.28(0.97-1.59) |
| Incidence | 212 | Islamic Republic of Mauritania | 2 | Female | 24 | 15-49 years | 532 | Inflammatory bowel disease | 3 | Rate | 2021 | 1.493463392 | 1.936130331 | 1.191299825 | Number | 2021 | 16.03137772 | 20.78312519 | 12.7878444 | 0.03(-0.18-0.24) |
| Incidence | 165 | Islamic Republic of Pakistan | 2 | Female | 24 | 15-49 years | 532 | Inflammatory bowel disease | 3 | Rate | 2021 | 5.767268764 | 7.398272795 | 4.611532878 | Number | 2021 | 3493.479838 | 4481.448308 | 2793.401485 | 0.84(0.82-0.87) |
| Incidence | 115 | Jamaica | 2 | Female | 24 | 15-49 years | 532 | Inflammatory bowel disease | 3 | Rate | 2021 | 3.414870691 | 4.440039526 | 2.719469097 | Number | 2021 | 26.36691904 | 34.28245849 | 20.99758029 | 0.46(0.33-0.59) |
| Incidence | 67 | Japan | 2 | Female | 24 | 15-49 years | 532 | Inflammatory bowel disease | 3 | Rate | 2021 | 2.623532612 | 3.308118485 | 2.121319753 | Number | 2021 | 652.376554 | 822.6080084 | 527.4945941 | -0.08(-0.64-0.49) |
| Incidence | 140 | Kingdom of Bahrain | 2 | Female | 24 | 15-49 years | 532 | Inflammatory bowel disease | 3 | Rate | 2021 | 3.302066829 | 4.24298162 | 2.622881579 | Number | 2021 | 10.76547487 | 13.83306709 | 8.551179359 | 1.13(1.01-1.24) |
| Incidence | 76 | Kingdom of Belgium | 2 | Female | 24 | 15-49 years | 532 | Inflammatory bowel disease | 3 | Rate | 2021 | 13.30970685 | 16.82348582 | 10.74143276 | Number | 2021 | 329.7592648 | 416.816116 | 266.1280981 | 0.83(0.66-1.00) |
| Incidence | 162 | Kingdom of Bhutan | 2 | Female | 24 | 15-49 years | 532 | Inflammatory bowel disease | 3 | Rate | 2021 | 6.563205906 | 8.348351469 | 5.208504425 | Number | 2021 | 13.58787365 | 17.28367913 | 10.78322104 | 1.27(1.22-1.33) |
| Incidence | 10 | Kingdom of Cambodia | 2 | Female | 24 | 15-49 years | 532 | Inflammatory bowel disease | 3 | Rate | 2021 | 0.830948116 | 1.103530462 | 0.654710602 | Number | 2021 | 37.54663055 | 49.86334256 | 29.58328757 | 0.86(0.79-0.93) |
| Incidence | 78 | Kingdom of Denmark | 2 | Female | 24 | 15-49 years | 532 | Inflammatory bowel disease | 3 | Rate | 2021 | 23.43591751 | 28.3050237 | 19.21708897 | Number | 2021 | 296.0089075 | 357.5084756 | 242.7227144 | -0.86(-1.13--0.59) |
| Incidence | 197 | Kingdom of Eswatini | 2 | Female | 24 | 15-49 years | 532 | Inflammatory bowel disease | 3 | Rate | 2021 | 2.04439573 | 2.615310795 | 1.630866806 | Number | 2021 | 6.443374037 | 8.242741574 | 5.140044408 | 0.61(0.49-0.74) |
| Incidence | 194 | Kingdom of Lesotho | 2 | Female | 24 | 15-49 years | 532 | Inflammatory bowel disease | 3 | Rate | 2021 | 1.873211746 | 2.395225064 | 1.519557785 | Number | 2021 | 9.495106779 | 12.14113556 | 7.702473285 | 0.32(0.21-0.42) |
| Incidence | 148 | Kingdom of Morocco | 2 | Female | 24 | 15-49 years | 532 | Inflammatory bowel disease | 3 | Rate | 2021 | 3.996620212 | 5.186464734 | 3.167336312 | Number | 2021 | 387.103857 | 502.3495844 | 306.7812395 | 1.07(1.01-1.13) |
| Incidence | 90 | Kingdom of Norway | 2 | Female | 24 | 15-49 years | 532 | Inflammatory bowel disease | 3 | Rate | 2021 | 25.75726691 | 30.99067772 | 21.55844355 | Number | 2021 | 311.9500868 | 375.3327028 | 261.0975132 | 0.49(0.34-0.64) |
| Incidence | 152 | Kingdom of Saudi Arabia | 2 | Female | 24 | 15-49 years | 532 | Inflammatory bowel disease | 3 | Rate | 2021 | 3.024940631 | 3.863358117 | 2.425892435 | Number | 2021 | 306.9159137 | 391.9832588 | 246.1354068 | -0.06(-0.23-0.11) |
| Incidence | 92 | Kingdom of Spain | 2 | Female | 24 | 15-49 years | 532 | Inflammatory bowel disease | 3 | Rate | 2021 | 12.74101014 | 15.92110503 | 10.22872808 | Number | 2021 | 1261.768225 | 1576.699509 | 1012.971808 | 0.28(-0.52-1.08) |
| Incidence | 93 | Kingdom of Sweden | 2 | Female | 24 | 15-49 years | 532 | Inflammatory bowel disease | 3 | Rate | 2021 | 25.43765683 | 29.69563945 | 21.69868347 | Number | 2021 | 558.8546384 | 652.4007285 | 476.7109638 | 0.03(-0.07-0.13) |
| Incidence | 18 | Kingdom of Thailand | 2 | Female | 24 | 15-49 years | 532 | Inflammatory bowel disease | 3 | Rate | 2021 | 0.811441604 | 1.041255066 | 0.648247896 | Number | 2021 | 132.2766042 | 169.7394901 | 105.6736922 | 0.79(0.75-0.83) |
| Incidence | 89 | Kingdom of the Netherlands | 2 | Female | 24 | 15-49 years | 532 | Inflammatory bowel disease | 3 | Rate | 2021 | 32.38224297 | 39.29695906 | 26.68298008 | Number | 2021 | 1188.302988 | 1442.046306 | 979.1620979 | 1.21(0.43-2.00) |
| Incidence | 29 | Kingdom of Tonga | 2 | Female | 24 | 15-49 years | 532 | Inflammatory bowel disease | 3 | Rate | 2021 | 0.863210432 | 1.11759872 | 0.682976565 | Number | 2021 | 0.218251362 | 0.282570083 | 0.172681608 | 0.90(0.84-0.95) |
| Incidence | 37 | Kyrgyz Republic | 2 | Female | 24 | 15-49 years | 532 | Inflammatory bowel disease | 3 | Rate | 2021 | 5.279054023 | 6.921407006 | 4.185507566 | Number | 2021 | 91.01696652 | 119.333022 | 72.16296715 | 0.45(0.40-0.50) |
| Incidence | 12 | Lao People's Democratic Republic | 2 | Female | 24 | 15-49 years | 532 | Inflammatory bowel disease | 3 | Rate | 2021 | 0.822763099 | 1.076041941 | 0.656289037 | Number | 2021 | 16.32637687 | 21.35227782 | 13.02297365 | 0.86(0.78-0.93) |
| Incidence | 146 | Lebanese Republic | 2 | Female | 24 | 15-49 years | 532 | Inflammatory bowel disease | 3 | Rate | 2021 | 10.31721502 | 13.22117811 | 8.271552453 | Number | 2021 | 153.0660637 | 196.1492211 | 122.7166412 | 1.00(0.93-1.08) |
| Incidence | 13 | Malaysia | 2 | Female | 24 | 15-49 years | 532 | Inflammatory bowel disease | 3 | Rate | 2021 | 0.980707764 | 1.252500375 | 0.771387863 | Number | 2021 | 82.64137588 | 105.5445445 | 65.00259983 | 1.60(1.25-1.94) |
| Incidence | 38 | Mongolia | 2 | Female | 24 | 15-49 years | 532 | Inflammatory bowel disease | 3 | Rate | 2021 | 6.482777881 | 8.455170769 | 5.045596588 | Number | 2021 | 54.70336546 | 71.34692953 | 42.57605601 | 1.45(1.41-1.48) |
| Incidence | 50 | Montenegro | 2 | Female | 24 | 15-49 years | 532 | Inflammatory bowel disease | 3 | Rate | 2021 | 8.762113188 | 11.16619825 | 6.973972332 | Number | 2021 | 12.61950913 | 16.08195852 | 10.04416465 | 0.56(0.49-0.64) |
| Incidence | 72 | New Zealand | 2 | Female | 24 | 15-49 years | 532 | Inflammatory bowel disease | 3 | Rate | 2021 | 30.70738766 | 38.98155792 | 24.97151384 | Number | 2021 | 366.8764266 | 465.7320523 | 298.3470905 | 0.13(-0.07-0.33) |
| Incidence | 49 | North Macedonia | 2 | Female | 24 | 15-49 years | 532 | Inflammatory bowel disease | 3 | Rate | 2021 | 9.939801723 | 12.49705858 | 7.873325572 | Number | 2021 | 52.75247374 | 66.32433655 | 41.78528023 | 1.02(0.95-1.09) |
| Incidence | 376 | Northern Mariana Islands | 2 | Female | 24 | 15-49 years | 532 | Inflammatory bowel disease | 3 | Rate | 2021 | 1.144667835 | 1.45344484 | 0.907751507 | Number | 2021 | 0.131007053 | 0.166346532 | 0.103892017 | 0.64(0.44-0.84) |
| Incidence | 149 | Palestine | 2 | Female | 24 | 15-49 years | 532 | Inflammatory bowel disease | 3 | Rate | 2021 | 3.724565586 | 4.80644022 | 2.901393742 | Number | 2021 | 48.49757773 | 62.58467002 | 37.77905511 | 1.29(1.24-1.33) |
| Incidence | 139 | People's Democratic Republic of Algeria | 2 | Female | 24 | 15-49 years | 532 | Inflammatory bowel disease | 3 | Rate | 2021 | 5.072131622 | 6.765818534 | 3.908106038 | Number | 2021 | 569.2614421 | 759.3493037 | 438.6191536 | 1.22(1.17-1.27) |
| Incidence | 161 | People's Republic of Bangladesh | 2 | Female | 24 | 15-49 years | 532 | Inflammatory bowel disease | 3 | Rate | 2021 | 6.222372303 | 8.128018538 | 4.932326611 | Number | 2021 | 2861.998709 | 3738.506381 | 2268.638343 | 0.78(0.73-0.83) |
| Incidence | 6 | People's Republic of China | 2 | Female | 24 | 15-49 years | 532 | Inflammatory bowel disease | 3 | Rate | 2021 | 1.8773377 | 2.410758878 | 1.494060331 | Number | 2021 | 5983.026882 | 7683.026434 | 4761.531783 | 3.45(2.71-4.19) |
| Incidence | 121 | Plurinational State of Bolivia | 2 | Female | 24 | 15-49 years | 532 | Inflammatory bowel disease | 3 | Rate | 2021 | 1.872885209 | 2.450321515 | 1.490072647 | Number | 2021 | 58.39612584 | 76.40045573 | 46.46011905 | 0.69(0.61-0.77) |
| Incidence | 91 | Portuguese Republic | 2 | Female | 24 | 15-49 years | 532 | Inflammatory bowel disease | 3 | Rate | 2021 | 11.55940395 | 14.70327592 | 9.322026456 | Number | 2021 | 269.0890551 | 342.2746224 | 217.0055914 | 0.99(0.58-1.40) |
| Incidence | 74 | Principality of Andorra | 2 | Female | 24 | 15-49 years | 532 | Inflammatory bowel disease | 3 | Rate | 2021 | 17.54925089 | 22.90300048 | 14.00538756 | Number | 2021 | 3.507632507 | 4.577705879 | 2.799307674 | 0.24(0.16-0.31) |
| Incidence | 367 | Principality of Monaco | 2 | Female | 24 | 15-49 years | 532 | Inflammatory bowel disease | 3 | Rate | 2021 | 17.28884392 | 21.8868672 | 13.91674392 | Number | 2021 | 1.234510451 | 1.56283245 | 0.993725543 | -0.26(-0.32--0.19) |
| Incidence | 385 | Puerto Rico | 2 | Female | 24 | 15-49 years | 532 | Inflammatory bowel disease | 3 | Rate | 2021 | 3.708703265 | 4.70530431 | 2.992165071 | Number | 2021 | 27.8099355 | 35.28300865 | 22.43693056 | 0.72(0.63-0.82) |
| Incidence | 43 | Republic of Albania | 2 | Female | 24 | 15-49 years | 532 | Inflammatory bowel disease | 3 | Rate | 2021 | 8.940208649 | 11.35579781 | 7.142995733 | Number | 2021 | 54.86770045 | 69.69261427 | 43.83787511 | 1.10(1.00-1.21) |
| Incidence | 168 | Republic of Angola | 2 | Female | 24 | 15-49 years | 532 | Inflammatory bowel disease | 3 | Rate | 2021 | 1.926088851 | 2.503711116 | 1.573285364 | Number | 2021 | 147.8277141 | 192.1603413 | 120.7499741 | 0.90(0.84-0.96) |
| Incidence | 33 | Republic of Armenia | 2 | Female | 24 | 15-49 years | 532 | Inflammatory bowel disease | 3 | Rate | 2021 | 6.094112825 | 7.864498967 | 4.812011204 | Number | 2021 | 44.90159989 | 57.94585629 | 35.455038 | 0.96(0.92-1.00) |
| Incidence | 75 | Republic of Austria | 2 | Female | 24 | 15-49 years | 532 | Inflammatory bowel disease | 3 | Rate | 2021 | 14.27130639 | 18.14267308 | 11.6387641 | Number | 2021 | 281.7884493 | 358.2289929 | 229.8086244 | 0.22(0.17-0.26) |
| Incidence | 34 | Republic of Azerbaijan | 2 | Female | 24 | 15-49 years | 532 | Inflammatory bowel disease | 3 | Rate | 2021 | 6.074008638 | 7.811364966 | 4.81527462 | Number | 2021 | 166.4950496 | 214.1178379 | 131.9918088 | 0.62(0.52-0.72) |
| Incidence | 57 | Republic of Belarus | 2 | Female | 24 | 15-49 years | 532 | Inflammatory bowel disease | 3 | Rate | 2021 | 5.432703162 | 7.166090646 | 4.255688033 | Number | 2021 | 115.2100233 | 151.9695529 | 90.24934788 | 1.04(0.97-1.11) |
| Incidence | 200 | Republic of Benin | 2 | Female | 24 | 15-49 years | 532 | Inflammatory bowel disease | 3 | Rate | 2021 | 1.452571649 | 1.845650545 | 1.160005591 | Number | 2021 | 47.12319548 | 59.87515417 | 37.63199583 | -0.10(-0.20--0.01) |
| Incidence | 193 | Republic of Botswana | 2 | Female | 24 | 15-49 years | 532 | Inflammatory bowel disease | 3 | Rate | 2021 | 2.357989228 | 3.043290849 | 1.864552867 | Number | 2021 | 16.04310964 | 20.70571323 | 12.68590447 | 1.19(1.10-1.28) |
| Incidence | 45 | Republic of Bulgaria | 2 | Female | 24 | 15-49 years | 532 | Inflammatory bowel disease | 3 | Rate | 2021 | 10.55242198 | 13.33100275 | 8.412296328 | Number | 2021 | 150.3152792 | 189.8951165 | 119.8299949 | 0.95(0.91-0.99) |
| Incidence | 175 | Republic of Burundi | 2 | Female | 24 | 15-49 years | 532 | Inflammatory bowel disease | 3 | Rate | 2021 | 1.547783359 | 1.978732675 | 1.229790016 | Number | 2021 | 48.40709969 | 61.88508832 | 38.46182191 | 0.37(0.28-0.46) |
| Incidence | 203 | Republic of Cabo Verde | 2 | Female | 24 | 15-49 years | 532 | Inflammatory bowel disease | 3 | Rate | 2021 | 1.594435657 | 2.02111474 | 1.281554426 | Number | 2021 | 2.39638271 | 3.0376669 | 1.926132832 | 0.63(0.52-0.74) |
| Incidence | 202 | Republic of Cameroon | 2 | Female | 24 | 15-49 years | 532 | Inflammatory bowel disease | 3 | Rate | 2021 | 1.743303719 | 2.205245439 | 1.381798175 | Number | 2021 | 136.5474864 | 172.7299255 | 108.2318964 | 0.30(0.15-0.46) |
| Incidence | 204 | Republic of Chad | 2 | Female | 24 | 15-49 years | 532 | Inflammatory bowel disease | 3 | Rate | 2021 | 1.278681282 | 1.612909994 | 1.025543317 | Number | 2021 | 49.45914708 | 62.38704965 | 39.66781908 | -0.18(-0.30--0.05) |
| Incidence | 98 | Republic of Chile | 2 | Female | 24 | 15-49 years | 532 | Inflammatory bowel disease | 3 | Rate | 2021 | 5.982276193 | 7.906682698 | 4.664504549 | Number | 2021 | 281.7755491 | 372.4184219 | 219.7062269 | 0.60(0.52-0.68) |
| Incidence | 125 | Republic of Colombia | 2 | Female | 24 | 15-49 years | 532 | Inflammatory bowel disease | 3 | Rate | 2021 | 1.350596234 | 1.717110633 | 1.032611747 | Number | 2021 | 176.9332586 | 224.948043 | 135.2760779 | 0.56(0.26-0.85) |
| Incidence | 126 | Republic of Costa Rica | 2 | Female | 24 | 15-49 years | 532 | Inflammatory bowel disease | 3 | Rate | 2021 | 0.726773399 | 0.975130999 | 0.559679616 | Number | 2021 | 9.408314832 | 12.62338366 | 7.2452322 | 0.28(0.22-0.34) |
| Incidence | 46 | Republic of Croatia | 2 | Female | 24 | 15-49 years | 532 | Inflammatory bowel disease | 3 | Rate | 2021 | 11.08866025 | 14.37161634 | 8.779032085 | Number | 2021 | 99.47056731 | 128.9202481 | 78.75210191 | 0.52(-0.17-1.22) |
| Incidence | 109 | Republic of Cuba | 2 | Female | 24 | 15-49 years | 532 | Inflammatory bowel disease | 3 | Rate | 2021 | 3.793678022 | 4.727035996 | 3.025204256 | Number | 2021 | 94.4201812 | 117.6503627 | 75.29377358 | 0.62(0.52-0.72) |
| Incidence | 77 | Republic of Cyprus | 2 | Female | 24 | 15-49 years | 532 | Inflammatory bowel disease | 3 | Rate | 2021 | 12.539196 | 16.18742693 | 10.09362205 | Number | 2021 | 44.78011201 | 57.80871368 | 36.04645193 | 0.34(0.18-0.50) |
| Incidence | 205 | Republic of C么te d'Ivoire | 2 | Female | 24 | 15-49 years | 532 | Inflammatory bowel disease | 3 | Rate | 2021 | 1.667135542 | 2.136349955 | 1.316672213 | Number | 2021 | 111.01151 | 142.2556406 | 87.67479724 | 0.20(0.04-0.36) |
| Incidence | 177 | Republic of Djibouti | 2 | Female | 24 | 15-49 years | 532 | Inflammatory bowel disease | 3 | Rate | 2021 | 1.889859438 | 2.433669198 | 1.489595404 | Number | 2021 | 6.071989309 | 7.819212929 | 4.785968304 | 0.87(0.80-0.94) |
| Incidence | 122 | Republic of Ecuador | 2 | Female | 24 | 15-49 years | 532 | Inflammatory bowel disease | 3 | Rate | 2021 | 1.697955018 | 2.179158388 | 1.338397806 | Number | 2021 | 80.06813888 | 102.759587 | 63.11299195 | 0.47(0.40-0.55) |
| Incidence | 127 | Republic of El Salvador | 2 | Female | 24 | 15-49 years | 532 | Inflammatory bowel disease | 3 | Rate | 2021 | 0.635348198 | 0.825810846 | 0.494430567 | Number | 2021 | 11.2855991 | 14.66875986 | 8.782499396 | -0.05(-0.10-0.00) |
| Incidence | 172 | Republic of Equatorial Guinea | 2 | Female | 24 | 15-49 years | 532 | Inflammatory bowel disease | 3 | Rate | 2021 | 2.226297507 | 2.884155533 | 1.743244525 | Number | 2021 | 8.114206408 | 10.51190743 | 6.353618888 | 1.45(1.21-1.69) |
| Incidence | 58 | Republic of Estonia | 2 | Female | 24 | 15-49 years | 532 | Inflammatory bowel disease | 3 | Rate | 2021 | 5.429274198 | 6.923492491 | 4.394924091 | Number | 2021 | 15.11321508 | 19.27260022 | 12.23394336 | 1.24(1.09-1.40) |
| Incidence | 22 | Republic of Fiji | 2 | Female | 24 | 15-49 years | 532 | Inflammatory bowel disease | 3 | Rate | 2021 | 1.116240508 | 1.484908116 | 0.883948645 | Number | 2021 | 2.549312198 | 3.391289194 | 2.018795274 | 0.95(0.84-1.06) |
| Incidence | 79 | Republic of Finland | 2 | Female | 24 | 15-49 years | 532 | Inflammatory bowel disease | 3 | Rate | 2021 | 19.34029932 | 23.59435589 | 15.79015719 | Number | 2021 | 219.8067604 | 268.1550501 | 179.4586134 | -1.85(-2.28--1.42) |
| Incidence | 207 | Republic of Ghana | 2 | Female | 24 | 15-49 years | 532 | Inflammatory bowel disease | 3 | Rate | 2021 | 1.694766878 | 2.119501924 | 1.371997709 | Number | 2021 | 154.7376411 | 193.5173104 | 125.2677827 | 0.50(0.36-0.63) |
| Incidence | 128 | Republic of Guatemala | 2 | Female | 24 | 15-49 years | 532 | Inflammatory bowel disease | 3 | Rate | 2021 | 0.680281962 | 0.888632626 | 0.517827397 | Number | 2021 | 29.90094685 | 39.05874098 | 22.76045867 | 0.41(0.33-0.48) |
| Incidence | 208 | Republic of Guinea | 2 | Female | 24 | 15-49 years | 532 | Inflammatory bowel disease | 3 | Rate | 2021 | 1.465119643 | 1.908296279 | 1.158679665 | Number | 2021 | 48.62141924 | 63.32866659 | 38.45191074 | -0.23(-0.39--0.07) |
| Incidence | 209 | Republic of Guinea-Bissau | 2 | Female | 24 | 15-49 years | 532 | Inflammatory bowel disease | 3 | Rate | 2021 | 1.499613347 | 1.926244288 | 1.189781567 | Number | 2021 | 7.877634961 | 10.11877453 | 6.250054313 | 0.03(-0.14-0.19) |
| Incidence | 113 | Republic of Guyana | 2 | Female | 24 | 15-49 years | 532 | Inflammatory bowel disease | 3 | Rate | 2021 | 3.992934335 | 5.248623924 | 3.164858331 | Number | 2021 | 8.113413089 | 10.66490217 | 6.430810239 | 0.77(0.64-0.91) |
| Incidence | 114 | Republic of Haiti | 2 | Female | 24 | 15-49 years | 532 | Inflammatory bowel disease | 3 | Rate | 2021 | 3.529068051 | 4.59689947 | 2.749505276 | Number | 2021 | 124.9286665 | 162.7297951 | 97.33221994 | 0.67(0.65-0.69) |
| Incidence | 129 | Republic of Honduras | 2 | Female | 24 | 15-49 years | 532 | Inflammatory bowel disease | 3 | Rate | 2021 | 0.671469825 | 0.892778074 | 0.524316526 | Number | 2021 | 19.05957675 | 25.34138033 | 14.882651 | 0.35(0.28-0.41) |
| Incidence | 83 | Republic of Iceland | 2 | Female | 24 | 15-49 years | 532 | Inflammatory bowel disease | 3 | Rate | 2021 | 22.86647006 | 27.37133045 | 18.53403704 | Number | 2021 | 18.20926063 | 21.796617 | 14.75921339 | -0.79(-0.94--0.65) |
| Incidence | 163 | Republic of India | 2 | Female | 24 | 15-49 years | 532 | Inflammatory bowel disease | 3 | Rate | 2021 | 5.958625188 | 7.572499899 | 4.793091775 | Number | 2021 | 22540.83776 | 28645.9521 | 18131.75031 | 1.05(0.85-1.26) |
| Incidence | 11 | Republic of Indonesia | 2 | Female | 24 | 15-49 years | 532 | Inflammatory bowel disease | 3 | Rate | 2021 | 0.903305277 | 1.166330155 | 0.717371781 | Number | 2021 | 680.1307881 | 878.1716082 | 540.1348216 | 0.52(0.47-0.57) |
| Incidence | 143 | Republic of Iraq | 2 | Female | 24 | 15-49 years | 532 | Inflammatory bowel disease | 3 | Rate | 2021 | 3.51726015 | 4.48778923 | 2.797033991 | Number | 2021 | 370.8076762 | 473.1258493 | 294.8777259 | 1.31(1.26-1.37) |
| Incidence | 86 | Republic of Italy | 2 | Female | 24 | 15-49 years | 532 | Inflammatory bowel disease | 3 | Rate | 2021 | 9.86240101 | 12.29134076 | 7.997899176 | Number | 2021 | 1196.638224 | 1491.349638 | 970.411957 | -0.40(-0.65--0.16) |
| Incidence | 36 | Republic of Kazakhstan | 2 | Female | 24 | 15-49 years | 532 | Inflammatory bowel disease | 3 | Rate | 2021 | 6.633727963 | 8.552543358 | 5.248621727 | Number | 2021 | 314.1584187 | 405.029195 | 248.5629063 | 0.81(0.62-1.00) |
| Incidence | 180 | Republic of Kenya | 2 | Female | 24 | 15-49 years | 532 | Inflammatory bowel disease | 3 | Rate | 2021 | 1.591086145 | 2.021456157 | 1.273960656 | Number | 2021 | 211.1791614 | 268.3006308 | 169.088232 | 1.11(0.99-1.22) |
| Incidence | 23 | Republic of Kiribati | 2 | Female | 24 | 15-49 years | 532 | Inflammatory bowel disease | 3 | Rate | 2021 | 0.945441377 | 1.235922493 | 0.732562595 | Number | 2021 | 0.302269217 | 0.395139597 | 0.234209257 | 0.63(0.59-0.68) |
| Incidence | 68 | Republic of Korea | 2 | Female | 24 | 15-49 years | 532 | Inflammatory bowel disease | 3 | Rate | 2021 | 5.844312424 | 7.381089929 | 4.692222504 | Number | 2021 | 677.5164678 | 855.671226 | 543.9575756 | 1.86(0.83-2.90) |
| Incidence | 59 | Republic of Latvia | 2 | Female | 24 | 15-49 years | 532 | Inflammatory bowel disease | 3 | Rate | 2021 | 5.749525639 | 7.290840967 | 4.575811614 | Number | 2021 | 22.40488841 | 28.41112269 | 17.83113165 | 0.89(0.77-1.00) |
| Incidence | 210 | Republic of Liberia | 2 | Female | 24 | 15-49 years | 532 | Inflammatory bowel disease | 3 | Rate | 2021 | 1.52373533 | 1.980963677 | 1.204620458 | Number | 2021 | 21.26117014 | 27.64102463 | 16.80845749 | -0.09(-0.36-0.19) |
| Incidence | 60 | Republic of Lithuania | 2 | Female | 24 | 15-49 years | 532 | Inflammatory bowel disease | 3 | Rate | 2021 | 7.351638195 | 9.635001263 | 5.731557004 | Number | 2021 | 42.11952719 | 55.20153289 | 32.83764308 | 1.46(0.87-2.06) |
| Incidence | 181 | Republic of Madagascar | 2 | Female | 24 | 15-49 years | 532 | Inflammatory bowel disease | 3 | Rate | 2021 | 1.713803354 | 2.163951273 | 1.381395845 | Number | 2021 | 124.137653 | 156.7436729 | 100.0600435 | 0.75(0.68-0.82) |
| Incidence | 182 | Republic of Malawi | 2 | Female | 24 | 15-49 years | 532 | Inflammatory bowel disease | 3 | Rate | 2021 | 1.768698874 | 2.295710491 | 1.420971191 | Number | 2021 | 88.59895542 | 114.9984061 | 71.18032646 | 1.00(0.89-1.11) |
| Incidence | 14 | Republic of Maldives | 2 | Female | 24 | 15-49 years | 532 | Inflammatory bowel disease | 3 | Rate | 2021 | 0.840895328 | 1.118945401 | 0.656776952 | Number | 2021 | 0.968644314 | 1.288935809 | 0.756554637 | 1.45(1.37-1.52) |
| Incidence | 211 | Republic of Mali | 2 | Female | 24 | 15-49 years | 532 | Inflammatory bowel disease | 3 | Rate | 2021 | 1.338322666 | 1.681230642 | 1.056636452 | Number | 2021 | 72.86279838 | 91.53186476 | 57.52685111 | -0.29(-0.40--0.18) |
| Incidence | 88 | Republic of Malta | 2 | Female | 24 | 15-49 years | 532 | Inflammatory bowel disease | 3 | Rate | 2021 | 10.76371808 | 13.93952097 | 8.575419776 | Number | 2021 | 10.14730576 | 13.14123803 | 8.08432605 | 0.14(0.01-0.27) |
| Incidence | 183 | Republic of Mauritius | 2 | Female | 24 | 15-49 years | 532 | Inflammatory bowel disease | 3 | Rate | 2021 | 0.883049707 | 1.138267528 | 0.691106257 | Number | 2021 | 2.794840077 | 3.602600938 | 2.18734172 | 0.58(0.54-0.62) |
| Incidence | 61 | Republic of Moldova | 2 | Female | 24 | 15-49 years | 532 | Inflammatory bowel disease | 3 | Rate | 2021 | 5.560037384 | 7.275847019 | 4.312792144 | Number | 2021 | 49.04437047 | 64.17930529 | 38.04258157 | 0.85(0.70-1.01) |
| Incidence | 184 | Republic of Mozambique | 2 | Female | 24 | 15-49 years | 532 | Inflammatory bowel disease | 3 | Rate | 2021 | 1.616157614 | 2.065615207 | 1.26575923 | Number | 2021 | 122.7033052 | 156.8274103 | 96.10005848 | 0.78(0.70-0.86) |
| Incidence | 195 | Republic of Namibia | 2 | Female | 24 | 15-49 years | 532 | Inflammatory bowel disease | 3 | Rate | 2021 | 1.90004957 | 2.45277279 | 1.508707786 | Number | 2021 | 12.56527999 | 16.220512 | 9.977284825 | 0.45(0.35-0.55) |
| Incidence | 369 | Republic of Nauru | 2 | Female | 24 | 15-49 years | 532 | Inflammatory bowel disease | 3 | Rate | 2021 | 1.070782192 | 1.371983185 | 0.839393842 | Number | 2021 | 0.030489773 | 0.039066261 | 0.023901152 | 0.51(0.41-0.61) |
| Incidence | 131 | Republic of Nicaragua | 2 | Female | 24 | 15-49 years | 532 | Inflammatory bowel disease | 3 | Rate | 2021 | 0.651556708 | 0.872758686 | 0.491637541 | Number | 2021 | 11.8120051 | 15.82215321 | 8.912846832 | 0.44(0.29-0.58) |
| Incidence | 374 | Republic of Niue | 2 | Female | 24 | 15-49 years | 532 | Inflammatory bowel disease | 3 | Rate | 2021 | 1.049559366 | 1.363740459 | 0.823182269 | Number | 2021 | 0.00402765 | 0.00523331 | 0.003158935 | 0.96(0.89-1.04) |
| Incidence | 380 | Republic of Palau | 2 | Female | 24 | 15-49 years | 532 | Inflammatory bowel disease | 3 | Rate | 2021 | 1.168892104 | 1.508570324 | 0.919875006 | Number | 2021 | 0.043780102 | 0.056502531 | 0.034453327 | 0.77(0.72-0.82) |
| Incidence | 132 | Republic of Panama | 2 | Female | 24 | 15-49 years | 532 | Inflammatory bowel disease | 3 | Rate | 2021 | 1.031880235 | 1.346713117 | 0.797179423 | Number | 2021 | 11.02962328 | 14.39482786 | 8.520939186 | 0.41(0.36-0.46) |
| Incidence | 136 | Republic of Paraguay | 2 | Female | 24 | 15-49 years | 532 | Inflammatory bowel disease | 3 | Rate | 2021 | 1.925301728 | 2.473368565 | 1.522374759 | Number | 2021 | 36.52329323 | 46.92021206 | 28.87970177 | 0.31(0.17-0.46) |
| Incidence | 123 | Republic of Peru | 2 | Female | 24 | 15-49 years | 532 | Inflammatory bowel disease | 3 | Rate | 2021 | 1.854483046 | 2.400248443 | 1.437005821 | Number | 2021 | 178.3798769 | 230.8762125 | 138.2233836 | 0.95(0.84-1.05) |
| Incidence | 51 | Republic of Poland | 2 | Female | 24 | 15-49 years | 532 | Inflammatory bowel disease | 3 | Rate | 2021 | 3.67819347 | 4.658944459 | 2.953372442 | Number | 2021 | 324.7132028 | 411.2945089 | 260.7255526 | 0.77(0.69-0.85) |
| Incidence | 185 | Republic of Rwanda | 2 | Female | 24 | 15-49 years | 532 | Inflammatory bowel disease | 3 | Rate | 2021 | 1.861316092 | 2.426960782 | 1.471054792 | Number | 2021 | 65.54718483 | 85.46664786 | 51.80393633 | 1.13(1.01-1.24) |
| Incidence | 396 | Republic of San Marino | 2 | Female | 24 | 15-49 years | 532 | Inflammatory bowel disease | 3 | Rate | 2021 | 19.60232067 | 24.78699984 | 15.75643174 | Number | 2021 | 1.396056684 | 1.765304088 | 1.122156515 | -0.09(-0.23-0.05) |
| Incidence | 216 | Republic of Senegal | 2 | Female | 24 | 15-49 years | 532 | Inflammatory bowel disease | 3 | Rate | 2021 | 1.563243288 | 1.987268937 | 1.226800449 | Number | 2021 | 60.98206936 | 77.52329598 | 47.85744522 | 0.71(0.51-0.91) |
| Incidence | 53 | Republic of Serbia | 2 | Female | 24 | 15-49 years | 532 | Inflammatory bowel disease | 3 | Rate | 2021 | 9.888081191 | 12.80763303 | 7.811029726 | Number | 2021 | 200.9990658 | 260.3459888 | 158.7779922 | 0.77(0.68-0.86) |
| Incidence | 186 | Republic of Seychelles | 2 | Female | 24 | 15-49 years | 532 | Inflammatory bowel disease | 3 | Rate | 2021 | 0.892622509 | 1.165502645 | 0.70469043 | Number | 2021 | 0.216378183 | 0.282526312 | 0.170822082 | 0.62(0.56-0.69) |
| Incidence | 217 | Republic of Sierra Leone | 2 | Female | 24 | 15-49 years | 532 | Inflammatory bowel disease | 3 | Rate | 2021 | 1.472023499 | 1.904060011 | 1.145225548 | Number | 2021 | 33.47695322 | 43.30238475 | 26.04487096 | -0.28(-0.44--0.12) |
| Incidence | 69 | Republic of Singapore | 2 | Female | 24 | 15-49 years | 532 | Inflammatory bowel disease | 3 | Rate | 2021 | 1.077381295 | 1.395355639 | 0.846329624 | Number | 2021 | 15.6722612 | 20.2977146 | 12.31123929 | 0.87(0.70-1.05) |
| Incidence | 55 | Republic of Slovenia | 2 | Female | 24 | 15-49 years | 532 | Inflammatory bowel disease | 3 | Rate | 2021 | 15.16528186 | 19.0948461 | 12.00138969 | Number | 2021 | 63.78736392 | 80.31567814 | 50.47957685 | 0.95(0.75-1.15) |
| Incidence | 196 | Republic of South Africa | 2 | Female | 24 | 15-49 years | 532 | Inflammatory bowel disease | 3 | Rate | 2021 | 1.833771713 | 2.339575466 | 1.469339378 | Number | 2021 | 284.0094489 | 362.3469235 | 227.5671852 | 0.57(0.45-0.69) |
| Incidence | 435 | Republic of South Sudan | 2 | Female | 24 | 15-49 years | 532 | Inflammatory bowel disease | 3 | Rate | 2021 | 1.560810068 | 1.988116849 | 1.224869122 | Number | 2021 | 36.23657592 | 46.15715172 | 28.4371967 | 0.73(0.66-0.80) |
| Incidence | 522 | Republic of Sudan | 2 | Female | 24 | 15-49 years | 532 | Inflammatory bowel disease | 3 | Rate | 2021 | 3.762863932 | 4.958888608 | 2.935115347 | Number | 2021 | 424.7877644 | 559.8063718 | 331.3436544 | 1.16(1.07-1.25) |
| Incidence | 118 | Republic of Suriname | 2 | Female | 24 | 15-49 years | 532 | Inflammatory bowel disease | 3 | Rate | 2021 | 3.914714109 | 5.039567546 | 3.113636305 | Number | 2021 | 5.681252437 | 7.313702764 | 4.518683447 | 0.77(0.69-0.84) |
| Incidence | 39 | Republic of Tajikistan | 2 | Female | 24 | 15-49 years | 532 | Inflammatory bowel disease | 3 | Rate | 2021 | 5.218916682 | 6.557973115 | 4.160361397 | Number | 2021 | 132.6333471 | 166.6640756 | 105.7312639 | 0.59(0.48-0.70) |
| Incidence | 170 | Republic of the Congo | 2 | Female | 24 | 15-49 years | 532 | Inflammatory bowel disease | 3 | Rate | 2021 | 2.038535684 | 2.565583201 | 1.643994327 | Number | 2021 | 29.20756094 | 36.75894824 | 23.55468431 | 1.18(1.14-1.22) |
| Incidence | 206 | Republic of the Gambia | 2 | Female | 24 | 15-49 years | 532 | Inflammatory bowel disease | 3 | Rate | 2021 | 1.492580937 | 1.941423048 | 1.197921628 | Number | 2021 | 9.179049293 | 11.939331 | 7.366958396 | 0.55(0.44-0.66) |
| Incidence | 24 | Republic of the Marshall Islands | 2 | Female | 24 | 15-49 years | 532 | Inflammatory bowel disease | 3 | Rate | 2021 | 0.985377289 | 1.244330589 | 0.776740329 | Number | 2021 | 0.146146123 | 0.184552752 | 0.115202155 | 0.94(0.90-0.98) |
| Incidence | 213 | Republic of the Niger | 2 | Female | 24 | 15-49 years | 532 | Inflammatory bowel disease | 3 | Rate | 2021 | 1.163243951 | 1.448240609 | 0.934529671 | Number | 2021 | 62.01361024 | 77.20704552 | 49.82064057 | -0.31(-0.38--0.24) |
| Incidence | 16 | Republic of the Philippines | 2 | Female | 24 | 15-49 years | 532 | Inflammatory bowel disease | 3 | Rate | 2021 | 0.588573371 | 0.772709377 | 0.469037589 | Number | 2021 | 172.5282307 | 226.5039302 | 137.4887643 | 0.56(0.51-0.62) |
| Incidence | 15 | Republic of the Union of Myanmar | 2 | Female | 24 | 15-49 years | 532 | Inflammatory bowel disease | 3 | Rate | 2021 | 0.88957858 | 1.145974785 | 0.69480674 | Number | 2021 | 134.4857185 | 173.2474745 | 105.0402807 | 1.00(0.97-1.04) |
| Incidence | 119 | Republic of Trinidad and Tobago | 2 | Female | 24 | 15-49 years | 532 | Inflammatory bowel disease | 3 | Rate | 2021 | 4.412778914 | 5.604980391 | 3.415838674 | Number | 2021 | 14.99751276 | 19.04939417 | 11.60925691 | 0.46(0.37-0.55) |
| Incidence | 154 | Republic of Tunisia | 2 | Female | 24 | 15-49 years | 532 | Inflammatory bowel disease | 3 | Rate | 2021 | 3.757986911 | 4.711211781 | 3.008851692 | Number | 2021 | 115.300691 | 144.5470638 | 92.31609568 | 1.06(1.04-1.09) |
| Incidence | 155 | Republic of Turkey | 2 | Female | 24 | 15-49 years | 532 | Inflammatory bowel disease | 3 | Rate | 2021 | 3.473311257 | 4.277219536 | 2.800468459 | Number | 2021 | 752.0261313 | 926.0848286 | 606.3451574 | 0.35(0.01-0.68) |
| Incidence | 190 | Republic of Uganda | 2 | Female | 24 | 15-49 years | 532 | Inflammatory bowel disease | 3 | Rate | 2021 | 1.698905429 | 2.164167743 | 1.337842594 | Number | 2021 | 176.9188973 | 225.369914 | 139.3189006 | 0.85(0.76-0.95) |
| Incidence | 41 | Republic of Uzbekistan | 2 | Female | 24 | 15-49 years | 532 | Inflammatory bowel disease | 3 | Rate | 2021 | 6.457870413 | 8.187019812 | 5.204653144 | Number | 2021 | 574.6631113 | 728.5340178 | 463.1437267 | 1.18(1.14-1.23) |
| Incidence | 30 | Republic of Vanuatu | 2 | Female | 24 | 15-49 years | 532 | Inflammatory bowel disease | 3 | Rate | 2021 | 0.859491644 | 1.136456818 | 0.676385965 | Number | 2021 | 0.673982812 | 0.891169061 | 0.530397843 | 0.68(0.65-0.71) |
| Incidence | 157 | Republic of Yemen | 2 | Female | 24 | 15-49 years | 532 | Inflammatory bowel disease | 3 | Rate | 2021 | 3.54073178 | 4.520808124 | 2.754654243 | Number | 2021 | 295.8513157 | 377.7431093 | 230.1693924 | 0.99(0.92-1.06) |
| Incidence | 191 | Republic of Zambia | 2 | Female | 24 | 15-49 years | 532 | Inflammatory bowel disease | 3 | Rate | 2021 | 1.99038072 | 2.560011323 | 1.581822302 | Number | 2021 | 97.9042614 | 125.9236563 | 77.80779956 | 1.12(1.02-1.22) |
| Incidence | 198 | Republic of Zimbabwe | 2 | Female | 24 | 15-49 years | 532 | Inflammatory bowel disease | 3 | Rate | 2021 | 1.793312563 | 2.321033246 | 1.418141268 | Number | 2021 | 72.81985492 | 94.24865903 | 57.58552276 | 0.58(0.37-0.79) |
| Incidence | 52 | Romania | 2 | Female | 24 | 15-49 years | 532 | Inflammatory bowel disease | 3 | Rate | 2021 | 2.986264377 | 3.825764658 | 2.400662627 | Number | 2021 | 121.2599783 | 155.34865 | 97.48108717 | 2.02(0.96-3.08) |
| Incidence | 62 | Russian Federation | 2 | Female | 24 | 15-49 years | 532 | Inflammatory bowel disease | 3 | Rate | 2021 | 5.109772972 | 6.53368182 | 4.082101246 | Number | 2021 | 1731.893109 | 2214.509056 | 1383.576737 | 0.73(0.64-0.82) |
| Incidence | 393 | Saint Kitts and Nevis | 2 | Female | 24 | 15-49 years | 532 | Inflammatory bowel disease | 3 | Rate | 2021 | 4.530255516 | 5.854798997 | 3.566317266 | Number | 2021 | 0.707320952 | 0.914125481 | 0.556818686 | 0.79(0.64-0.94) |
| Incidence | 116 | Saint Lucia | 2 | Female | 24 | 15-49 years | 532 | Inflammatory bowel disease | 3 | Rate | 2021 | 3.986558131 | 5.140751886 | 3.066763701 | Number | 2021 | 1.820918882 | 2.348113804 | 1.400789289 | 0.93(0.89-0.96) |
| Incidence | 117 | Saint Vincent and the Grenadines | 2 | Female | 24 | 15-49 years | 532 | Inflammatory bowel disease | 3 | Rate | 2021 | 4.074518625 | 5.266135196 | 3.25333114 | Number | 2021 | 1.132505529 | 1.463713331 | 0.904257863 | 0.90(0.81-1.00) |
| Incidence | 54 | Slovak Republic | 2 | Female | 24 | 15-49 years | 532 | Inflammatory bowel disease | 3 | Rate | 2021 | 10.08553425 | 12.93121817 | 8.138904818 | Number | 2021 | 127.3020261 | 163.2209293 | 102.7312037 | 1.33(1.22-1.43) |
| Incidence | 20 | Socialist Republic of Viet Nam | 2 | Female | 24 | 15-49 years | 532 | Inflammatory bowel disease | 3 | Rate | 2021 | 0.796408538 | 1.021425437 | 0.626343906 | Number | 2021 | 203.4156305 | 260.8885883 | 159.9783709 | 1.00(0.94-1.06) |
| Incidence | 28 | Solomon Islands | 2 | Female | 24 | 15-49 years | 532 | Inflammatory bowel disease | 3 | Rate | 2021 | 0.848430352 | 1.100183743 | 0.663922739 | Number | 2021 | 1.454595497 | 1.886215309 | 1.138265532 | 0.87(0.84-0.89) |
| Incidence | 178 | State of Eritrea | 2 | Female | 24 | 15-49 years | 532 | Inflammatory bowel disease | 3 | Rate | 2021 | 1.775553362 | 2.310274449 | 1.413589732 | Number | 2021 | 29.38939828 | 38.24023391 | 23.39808676 | 0.90(0.84-0.95) |
| Incidence | 85 | State of Israel | 2 | Female | 24 | 15-49 years | 532 | Inflammatory bowel disease | 3 | Rate | 2021 | 17.40585216 | 22.2703441 | 13.8349519 | Number | 2021 | 387.1835496 | 495.391481 | 307.7508493 | -0.27(-0.79-0.27) |
| Incidence | 145 | State of Kuwait | 2 | Female | 24 | 15-49 years | 532 | Inflammatory bowel disease | 3 | Rate | 2021 | 5.144121254 | 6.753444869 | 4.009976727 | Number | 2021 | 75.19427892 | 98.71859393 | 58.61590223 | -0.01(-0.56-0.55) |
| Incidence | 147 | State of Libya | 2 | Female | 24 | 15-49 years | 532 | Inflammatory bowel disease | 3 | Rate | 2021 | 4.015950645 | 5.170652734 | 3.146631617 | Number | 2021 | 79.88372266 | 102.8526059 | 62.59156788 | 3.27(3.09-3.46) |
| Incidence | 151 | State of Qatar | 2 | Female | 24 | 15-49 years | 532 | Inflammatory bowel disease | 3 | Rate | 2021 | 4.929015506 | 6.281482258 | 3.843376018 | Number | 2021 | 27.34512113 | 34.84831667 | 21.32222604 | 1.05(1.00-1.11) |
| Incidence | 150 | Sultanate of Oman | 2 | Female | 24 | 15-49 years | 532 | Inflammatory bowel disease | 3 | Rate | 2021 | 4.370859859 | 5.641507342 | 3.445291757 | Number | 2021 | 44.3856312 | 57.28892537 | 34.98658255 | 1.67(1.57-1.78) |
| Incidence | 94 | Swiss Confederation | 2 | Female | 24 | 15-49 years | 532 | Inflammatory bowel disease | 3 | Rate | 2021 | 16.38699562 | 20.9270369 | 13.15421328 | Number | 2021 | 320.6214238 | 409.4500614 | 257.3700932 | 0.16(0.12-0.21) |
| Incidence | 153 | Syrian Arab Republic | 2 | Female | 24 | 15-49 years | 532 | Inflammatory bowel disease | 3 | Rate | 2021 | 3.961836799 | 5.031449335 | 3.18099907 | Number | 2021 | 154.1334481 | 195.7462344 | 123.7553135 | 1.30(1.04-1.55) |
| Incidence | 8 | Taiwan (Province of China) | 2 | Female | 24 | 15-49 years | 532 | Inflammatory bowel disease | 3 | Rate | 2021 | 1.155283324 | 1.541257175 | 0.889333737 | Number | 2021 | 64.89972598 | 86.58237008 | 49.95961996 | 2.67(1.83-3.53) |
| Incidence | 218 | Togolese Republic | 2 | Female | 24 | 15-49 years | 532 | Inflammatory bowel disease | 3 | Rate | 2021 | 1.735778281 | 2.164404967 | 1.366450264 | Number | 2021 | 37.42883517 | 46.67137368 | 29.46496235 | 0.60(0.50-0.70) |
| Incidence | 413 | Tokelau | 2 | Female | 24 | 15-49 years | 532 | Inflammatory bowel disease | 3 | Rate | 2021 | 1.022603974 | 1.336542042 | 0.813188129 | Number | 2021 | 0.003288339 | 0.004297854 | 0.00261493 | 0.41(0.28-0.54) |
| Incidence | 40 | Turkmenistan | 2 | Female | 24 | 15-49 years | 532 | Inflammatory bowel disease | 3 | Rate | 2021 | 6.422919367 | 8.182751535 | 5.03402695 | Number | 2021 | 80.71084435 | 102.8250158 | 63.25792719 | 0.91(0.88-0.94) |
| Incidence | 416 | Tuvalu | 2 | Female | 24 | 15-49 years | 532 | Inflammatory bowel disease | 3 | Rate | 2021 | 1.001859313 | 1.321888866 | 0.783784572 | Number | 2021 | 0.029096336 | 0.038390742 | 0.022762936 | 0.62(0.54-0.69) |
| Incidence | 63 | Ukraine | 2 | Female | 24 | 15-49 years | 532 | Inflammatory bowel disease | 3 | Rate | 2021 | 6.050663666 | 7.912573396 | 4.733919595 | Number | 2021 | 611.4349653 | 799.585683 | 478.3746251 | 1.29(1.03-1.54) |
| Incidence | 176 | Union of the Comoros | 2 | Female | 24 | 15-49 years | 532 | Inflammatory bowel disease | 3 | Rate | 2021 | 1.934746012 | 2.457318205 | 1.539588007 | Number | 2021 | 3.777062458 | 4.797241749 | 3.005624525 | 0.99(0.81-1.18) |
| Incidence | 156 | United Arab Emirates | 2 | Female | 24 | 15-49 years | 532 | Inflammatory bowel disease | 3 | Rate | 2021 | 5.972409651 | 7.824257166 | 4.622435155 | Number | 2021 | 102.9635066 | 134.8890986 | 79.6901352 | 1.66(1.57-1.76) |
| Incidence | 95 | United Kingdom of Great Britain and Northern Ireland | 2 | Female | 24 | 15-49 years | 532 | Inflammatory bowel disease | 3 | Rate | 2021 | 20.79000048 | 25.5809218 | 17.13017929 | Number | 2021 | 3189.088531 | 3923.993383 | 2627.689131 | -0.21(-0.39--0.03) |
| Incidence | 130 | United Mexican States | 2 | Female | 24 | 15-49 years | 532 | Inflammatory bowel disease | 3 | Rate | 2021 | 0.221209196 | 0.293024091 | 0.173070563 | Number | 2021 | 77.5205216 | 102.6873238 | 60.65082543 | 0.56(0.25-0.88) |
| Incidence | 189 | United Republic of Tanzania | 2 | Female | 24 | 15-49 years | 532 | Inflammatory bowel disease | 3 | Rate | 2021 | 1.747589901 | 2.241249506 | 1.384821413 | Number | 2021 | 259.6825732 | 333.0377674 | 205.7771035 | 0.80(0.68-0.92) |
| Incidence | 102 | United States of America | 2 | Female | 24 | 15-49 years | 532 | Inflammatory bowel disease | 3 | Rate | 2021 | 21.91146877 | 26.61502514 | 18.20274704 | Number | 2021 | 16590.0819 | 20151.33953 | 13782.05484 | 0.45(0.28-0.61) |
| Incidence | 422 | United States Virgin Islands | 2 | Female | 24 | 15-49 years | 532 | Inflammatory bowel disease | 3 | Rate | 2021 | 4.386350299 | 5.746694038 | 3.452173844 | Number | 2021 | 0.754538589 | 0.988544489 | 0.593841851 | 0.64(0.59-0.70) |

| **Supplement Table 4.Death Rates and Death Numbers in 2021, and Estimated Annual Percentage Changes (EAPCs) from 1992 to 2021 for Inflammatory Bowel Disease among Women of Reproductive Age across 204 Countries and Territories.** | | | | | | | | | | | | | | | | | | | | |
| --- | --- | --- | --- | --- | --- | --- | --- | --- | --- | --- | --- | --- | --- | --- | --- | --- | --- | --- | --- | --- |
| measure_name | location_id | location_name | sex_id | sex_name | age_id | age_name | cause_id | cause_name | metric_id | metric_name | year | val | upper | lower | metric_name | year | val | upper | lower | EAPCs |
| Deaths | 298 | American Samoa | 2 | Female | 24 | 15-49 years | 532 | Inflammatory bowel disease | 3 | Rate | 2021 | 0.053230955 | 0.089650019 | 0.02943194 | Number | 2021 | 0.00624565 | 0.010518742 | 0.003453284 | 4.02(2.84-5.22) |
| Deaths | 105 | Antigua and Barbuda | 2 | Female | 24 | 15-49 years | 532 | Inflammatory bowel disease | 3 | Rate | 2021 | 0.083607831 | 0.096992096 | 0.071977468 | Number | 2021 | 0.020203062 | 0.023437247 | 0.017392692 | -2.41(-2.79--2.03) |
| Deaths | 141 | Arab Republic of Egypt | 2 | Female | 24 | 15-49 years | 532 | Inflammatory bowel disease | 3 | Rate | 2021 | 0.08573825 | 0.152631956 | 0.048301453 | Number | 2021 | 22.24712211 | 39.60451436 | 12.5331263 | -1.40(-1.82--0.98) |
| Deaths | 97 | Argentine Republic | 2 | Female | 24 | 15-49 years | 532 | Inflammatory bowel disease | 3 | Rate | 2021 | 0.064327829 | 0.071974296 | 0.057243929 | Number | 2021 | 7.646201374 | 8.555083778 | 6.804187493 | -0.89(-1.26--0.51) |
| Deaths | 71 | Australia | 2 | Female | 24 | 15-49 years | 532 | Inflammatory bowel disease | 3 | Rate | 2021 | 0.104737527 | 0.118840996 | 0.092504116 | Number | 2021 | 6.309737795 | 7.159377754 | 5.572756332 | 3.44(2.37-4.51) |
| Deaths | 107 | Barbados | 2 | Female | 24 | 15-49 years | 532 | Inflammatory bowel disease | 3 | Rate | 2021 | 0.214675856 | 0.284803053 | 0.159396921 | Number | 2021 | 0.152825516 | 0.202748341 | 0.113473016 | -0.30(-0.77-0.18) |
| Deaths | 108 | Belize | 2 | Female | 24 | 15-49 years | 532 | Inflammatory bowel disease | 3 | Rate | 2021 | 0.111997132 | 0.133783574 | 0.090159133 | Number | 2021 | 0.135283061 | 0.161599239 | 0.108904605 | -1.77(-2.26--1.27) |
| Deaths | 305 | Bermuda | 2 | Female | 24 | 15-49 years | 532 | Inflammatory bowel disease | 3 | Rate | 2021 | 0.081420928 | 0.100665978 | 0.062618841 | Number | 2021 | 0.010977213 | 0.013571841 | 0.008442305 | -5.23(-5.72--4.74) |
| Deaths | 133 | Bolivarian Republic of Venezuela | 2 | Female | 24 | 15-49 years | 532 | Inflammatory bowel disease | 3 | Rate | 2021 | 0.06434019 | 0.090621611 | 0.04147937 | Number | 2021 | 4.416152357 | 6.220044407 | 2.847041938 | 1.01(0.69-1.34) |
| Deaths | 44 | Bosnia and Herzegovina | 2 | Female | 24 | 15-49 years | 532 | Inflammatory bowel disease | 3 | Rate | 2021 | 0.108703878 | 0.185710464 | 0.05950753 | Number | 2021 | 0.795282623 | 1.35866638 | 0.435359853 | -1.56(-1.77--1.35) |
| Deaths | 66 | Brunei Darussalam | 2 | Female | 24 | 15-49 years | 532 | Inflammatory bowel disease | 3 | Rate | 2021 | 0.188163371 | 0.319007048 | 0.114429714 | Number | 2021 | 0.235088925 | 0.398563352 | 0.142967031 | -0.25(-0.50--0.00) |
| Deaths | 201 | Burkina Faso | 2 | Female | 24 | 15-49 years | 532 | Inflammatory bowel disease | 3 | Rate | 2021 | 0.767858895 | 1.286732453 | 0.35941501 | Number | 2021 | 42.17724141 | 70.67812285 | 19.74208249 | 0.86(0.53-1.19) |
| Deaths | 101 | Canada | 2 | Female | 24 | 15-49 years | 532 | Inflammatory bowel disease | 3 | Rate | 2021 | 0.134517697 | 0.152967413 | 0.117399303 | Number | 2021 | 11.15680376 | 12.68701033 | 9.737016169 | 0.92(0.48-1.36) |
| Deaths | 169 | Central African Republic | 2 | Female | 24 | 15-49 years | 532 | Inflammatory bowel disease | 3 | Rate | 2021 | 0.111846485 | 0.205334201 | 0.046315151 | Number | 2021 | 1.547350196 | 2.840714361 | 0.640751093 | 0.74(0.61-0.87) |
| Deaths | 110 | Commonwealth of Dominica | 2 | Female | 24 | 15-49 years | 532 | Inflammatory bowel disease | 3 | Rate | 2021 | 0.087677162 | 0.141793046 | 0.052764466 | Number | 2021 | 0.014411543 | 0.023306601 | 0.008672924 | 0.17(-0.02-0.36) |
| Deaths | 106 | Commonwealth of the Bahamas | 2 | Female | 24 | 15-49 years | 532 | Inflammatory bowel disease | 3 | Rate | 2021 | 0.23560704 | 0.313297595 | 0.175438516 | Number | 2021 | 0.254030385 | 0.33779597 | 0.18915697 | -1.88(-2.26--1.51) |
| Deaths | 320 | Cook Islands | 2 | Female | 24 | 15-49 years | 532 | Inflammatory bowel disease | 3 | Rate | 2021 | 0.016266296 | 0.036934217 | 0.006136056 | Number | 2021 | 0.000700631 | 0.00159085 | 0.000264295 | -0.03(-0.29-0.22) |
| Deaths | 47 | Czech Republic | 2 | Female | 24 | 15-49 years | 532 | Inflammatory bowel disease | 3 | Rate | 2021 | 0.143696259 | 0.182261328 | 0.112755206 | Number | 2021 | 3.296248671 | 4.180892838 | 2.586491819 | -0.53(-0.93--0.11) |
| Deaths | 7 | Democratic People's Republic of Korea | 2 | Female | 24 | 15-49 years | 532 | Inflammatory bowel disease | 3 | Rate | 2021 | 0.068343462 | 0.133007452 | 0.031211321 | Number | 2021 | 4.50372998 | 8.764988372 | 2.056778451 | -0.04(-0.13-0.06) |
| Deaths | 215 | Democratic Republic of Sao Tome and Principe | 2 | Female | 24 | 15-49 years | 532 | Inflammatory bowel disease | 3 | Rate | 2021 | 0.574348635 | 1.4074507 | 0.197346911 | Number | 2021 | 0.322164866 | 0.78947026 | 0.110696252 | 0.25(-0.19-0.70) |
| Deaths | 171 | Democratic Republic of the Congo | 2 | Female | 24 | 15-49 years | 532 | Inflammatory bowel disease | 3 | Rate | 2021 | 0.08502815 | 0.14502058 | 0.043703231 | Number | 2021 | 18.11736075 | 30.90023918 | 9.312059628 | -0.23(-0.44--0.02) |
| Deaths | 19 | Democratic Republic of Timor-Leste | 2 | Female | 24 | 15-49 years | 532 | Inflammatory bowel disease | 3 | Rate | 2021 | 0.042965575 | 0.089700319 | 0.016802429 | Number | 2021 | 0.148751818 | 0.310552938 | 0.058171962 | -0.46(-1.14-0.23) |
| Deaths | 17 | Democratic Socialist Republic of Sri Lanka | 2 | Female | 24 | 15-49 years | 532 | Inflammatory bowel disease | 3 | Rate | 2021 | 0.003974762 | 0.007719284 | 0.002034735 | Number | 2021 | 0.224459322 | 0.435916764 | 0.114903785 | -3.50(-3.71--3.28) |
| Deaths | 111 | Dominican Republic | 2 | Female | 24 | 15-49 years | 532 | Inflammatory bowel disease | 3 | Rate | 2021 | 0.067723862 | 0.111987233 | 0.037304614 | Number | 2021 | 1.961834783 | 3.244062601 | 1.080645525 | -0.67(-0.92--0.41) |
| Deaths | 99 | Eastern Republic of Uruguay | 2 | Female | 24 | 15-49 years | 532 | Inflammatory bowel disease | 3 | Rate | 2021 | 0.128089432 | 0.143469308 | 0.113580309 | Number | 2021 | 1.066184729 | 1.194203016 | 0.945414384 | -0.88(-1.13--0.64) |
| Deaths | 179 | Federal Democratic Republic of Ethiopia | 2 | Female | 24 | 15-49 years | 532 | Inflammatory bowel disease | 3 | Rate | 2021 | 0.074059146 | 0.122156271 | 0.04054581 | Number | 2021 | 20.5285384 | 33.86063495 | 11.23893901 | -1.29(-1.48--1.10) |
| Deaths | 164 | Federal Democratic Republic of Nepal | 2 | Female | 24 | 15-49 years | 532 | Inflammatory bowel disease | 3 | Rate | 2021 | 0.128495934 | 0.219829029 | 0.074459178 | Number | 2021 | 11.6562531 | 19.94135319 | 6.754416263 | -1.76(-1.88--1.64) |
| Deaths | 81 | Federal Republic of Germany | 2 | Female | 24 | 15-49 years | 532 | Inflammatory bowel disease | 3 | Rate | 2021 | 0.228843117 | 0.262705112 | 0.199828461 | Number | 2021 | 38.97363198 | 44.74057377 | 34.03222688 | 0.87(0.38-1.36) |
| Deaths | 214 | Federal Republic of Nigeria | 2 | Female | 24 | 15-49 years | 532 | Inflammatory bowel disease | 3 | Rate | 2021 | 0.5563248 | 1.036279308 | 0.20266329 | Number | 2021 | 319.4459618 | 595.0395169 | 116.3708138 | 0.53(0.41-0.66) |
| Deaths | 187 | Federal Republic of Somalia | 2 | Female | 24 | 15-49 years | 532 | Inflammatory bowel disease | 3 | Rate | 2021 | 0.078350195 | 0.165359173 | 0.032944237 | Number | 2021 | 3.789353406 | 7.997482936 | 1.59332541 | -1.01(-1.24--0.78) |
| Deaths | 25 | Federated States of Micronesia | 2 | Female | 24 | 15-49 years | 532 | Inflammatory bowel disease | 3 | Rate | 2021 | 0.0317053 | 0.055951917 | 0.014821142 | Number | 2021 | 0.008290906 | 0.014631373 | 0.003875714 | 0.01(-0.08-0.10) |
| Deaths | 135 | Federative Republic of Brazil | 2 | Female | 24 | 15-49 years | 532 | Inflammatory bowel disease | 3 | Rate | 2021 | 0.230585979 | 0.245662563 | 0.214995658 | Number | 2021 | 135.3905341 | 144.2428797 | 126.2365432 | 0.84(0.53-1.14) |
| Deaths | 80 | French Republic | 2 | Female | 24 | 15-49 years | 532 | Inflammatory bowel disease | 3 | Rate | 2021 | 0.156917342 | 0.178002377 | 0.138919471 | Number | 2021 | 22.27808295 | 25.27159637 | 19.72286472 | 0.71(0.11-1.32) |
| Deaths | 173 | Gabonese Republic | 2 | Female | 24 | 15-49 years | 532 | Inflammatory bowel disease | 3 | Rate | 2021 | 0.082135645 | 0.154165169 | 0.033045967 | Number | 2021 | 0.402107327 | 0.754738627 | 0.161781473 | 0.23(-0.07-0.53) |
| Deaths | 35 | Georgia | 2 | Female | 24 | 15-49 years | 532 | Inflammatory bowel disease | 3 | Rate | 2021 | 0.088450847 | 0.116789822 | 0.065162184 | Number | 2021 | 0.696080611 | 0.919099515 | 0.512806091 | -0.97(-2.30-0.38) |
| Deaths | 87 | Grand Duchy of Luxembourg | 2 | Female | 24 | 15-49 years | 532 | Inflammatory bowel disease | 3 | Rate | 2021 | 0.107718985 | 0.123273546 | 0.091609093 | Number | 2021 | 0.167701944 | 0.191918012 | 0.142621313 | -0.65(-1.43-0.13) |
| Deaths | 349 | Greenland | 2 | Female | 24 | 15-49 years | 532 | Inflammatory bowel disease | 3 | Rate | 2021 | 0.137282784 | 0.246488584 | 0.078179226 | Number | 2021 | 0.017473506 | 0.031373343 | 0.009950739 | -0.69(-0.94--0.43) |
| Deaths | 112 | Grenada | 2 | Female | 24 | 15-49 years | 532 | Inflammatory bowel disease | 3 | Rate | 2021 | 0.293729629 | 0.373069041 | 0.235079894 | Number | 2021 | 0.07523889 | 0.095561693 | 0.060215751 | -2.02(-2.34--1.70) |
| Deaths | 351 | Guam | 2 | Female | 24 | 15-49 years | 532 | Inflammatory bowel disease | 3 | Rate | 2021 | 0.01525151 | 0.024594327 | 0.008852829 | Number | 2021 | 0.005502522 | 0.008873274 | 0.003193971 | 3.98(2.49-5.50) |
| Deaths | 144 | Hashemite Kingdom of Jordan | 2 | Female | 24 | 15-49 years | 532 | Inflammatory bowel disease | 3 | Rate | 2021 | 0.065823612 | 0.10310344 | 0.035649664 | Number | 2021 | 2.039881069 | 3.195187097 | 1.10478707 | -0.91(-1.19--0.63) |
| Deaths | 82 | Hellenic Republic | 2 | Female | 24 | 15-49 years | 532 | Inflammatory bowel disease | 3 | Rate | 2021 | 0.032317592 | 0.037009909 | 0.028344206 | Number | 2021 | 0.700498299 | 0.802206362 | 0.614373378 | 2.58(1.98-3.18) |
| Deaths | 48 | Hungary | 2 | Female | 24 | 15-49 years | 532 | Inflammatory bowel disease | 3 | Rate | 2021 | 0.221398767 | 0.271348674 | 0.17108397 | Number | 2021 | 4.735415714 | 5.803775663 | 3.659251276 | -1.02(-1.42--0.61) |
| Deaths | 26 | Independent State of Papua New Guinea | 2 | Female | 24 | 15-49 years | 532 | Inflammatory bowel disease | 3 | Rate | 2021 | 0.014874913 | 0.026055241 | 0.007313517 | Number | 2021 | 0.38915862 | 0.681659229 | 0.191336805 | -0.43(-0.75--0.11) |
| Deaths | 27 | Independent State of Samoa | 2 | Female | 24 | 15-49 years | 532 | Inflammatory bowel disease | 3 | Rate | 2021 | 0.024948811 | 0.044454383 | 0.01178544 | Number | 2021 | 0.012138067 | 0.021627896 | 0.005733839 | 0.85(0.67-1.03) |
| Deaths | 84 | Ireland | 2 | Female | 24 | 15-49 years | 532 | Inflammatory bowel disease | 3 | Rate | 2021 | 0.148880529 | 0.180719462 | 0.121255453 | Number | 2021 | 1.737002602 | 2.108470319 | 1.414698337 | 0.85(0.19-1.52) |
| Deaths | 160 | Islamic Republic of Afghanistan | 2 | Female | 24 | 15-49 years | 532 | Inflammatory bowel disease | 3 | Rate | 2021 | 0.126136937 | 0.461163044 | 0.022157767 | Number | 2021 | 9.075921335 | 33.18202892 | 1.594316082 | 0.61(0.45-0.78) |
| Deaths | 142 | Islamic Republic of Iran | 2 | Female | 24 | 15-49 years | 532 | Inflammatory bowel disease | 3 | Rate | 2021 | 0.026947789 | 0.042753493 | 0.011347952 | Number | 2021 | 6.264132462 | 9.938238315 | 2.637881445 | 0.24(-0.19-0.68) |
| Deaths | 212 | Islamic Republic of Mauritania | 2 | Female | 24 | 15-49 years | 532 | Inflammatory bowel disease | 3 | Rate | 2021 | 0.683362883 | 1.190010228 | 0.355752301 | Number | 2021 | 7.335465039 | 12.7740014 | 3.818774224 | 0.70(0.44-0.96) |
| Deaths | 165 | Islamic Republic of Pakistan | 2 | Female | 24 | 15-49 years | 532 | Inflammatory bowel disease | 3 | Rate | 2021 | 0.192813217 | 0.338666223 | 0.092266236 | Number | 2021 | 116.7951616 | 205.1445266 | 55.88958101 | -0.66(-0.81--0.51) |
| Deaths | 115 | Jamaica | 2 | Female | 24 | 15-49 years | 532 | Inflammatory bowel disease | 3 | Rate | 2021 | 0.099149921 | 0.136098955 | 0.068845358 | Number | 2021 | 0.765556934 | 1.050848026 | 0.531569174 | 0.81(0.13-1.50) |
| Deaths | 67 | Japan | 2 | Female | 24 | 15-49 years | 532 | Inflammatory bowel disease | 3 | Rate | 2021 | 0.016259506 | 0.01699506 | 0.015402807 | Number | 2021 | 4.043144019 | 4.226049389 | 3.830114335 | -2.60(-3.04--2.16) |
| Deaths | 140 | Kingdom of Bahrain | 2 | Female | 24 | 15-49 years | 532 | Inflammatory bowel disease | 3 | Rate | 2021 | 0.031000673 | 0.080215244 | 0.011552839 | Number | 2021 | 0.101069113 | 0.261519599 | 0.037664833 | -0.64(-0.83--0.45) |
| Deaths | 76 | Kingdom of Belgium | 2 | Female | 24 | 15-49 years | 532 | Inflammatory bowel disease | 3 | Rate | 2021 | 0.1489285 | 0.166411979 | 0.132620987 | Number | 2021 | 3.689829765 | 4.122997776 | 3.285797314 | 0.15(-0.57-0.88) |
| Deaths | 162 | Kingdom of Bhutan | 2 | Female | 24 | 15-49 years | 532 | Inflammatory bowel disease | 3 | Rate | 2021 | 0.134064207 | 0.245354674 | 0.072873432 | Number | 2021 | 0.277554526 | 0.507960341 | 0.150870626 | -0.94(-1.03--0.86) |
| Deaths | 10 | Kingdom of Cambodia | 2 | Female | 24 | 15-49 years | 532 | Inflammatory bowel disease | 3 | Rate | 2021 | 0.088681363 | 0.167218401 | 0.038639188 | Number | 2021 | 4.007093009 | 7.555811735 | 1.745922858 | -1.09(-1.20--0.99) |
| Deaths | 78 | Kingdom of Denmark | 2 | Female | 24 | 15-49 years | 532 | Inflammatory bowel disease | 3 | Rate | 2021 | 0.073118104 | 0.0860781 | 0.062554926 | Number | 2021 | 0.923523054 | 1.087215143 | 0.79010413 | -1.03(-1.60--0.46) |
| Deaths | 197 | Kingdom of Eswatini | 2 | Female | 24 | 15-49 years | 532 | Inflammatory bowel disease | 3 | Rate | 2021 | 0.122444749 | 0.216444777 | 0.053544732 | Number | 2021 | 0.385912231 | 0.682174509 | 0.168758294 | 0.67(0.21-1.13) |
| Deaths | 194 | Kingdom of Lesotho | 2 | Female | 24 | 15-49 years | 532 | Inflammatory bowel disease | 3 | Rate | 2021 | 0.120364415 | 0.200229778 | 0.064931061 | Number | 2021 | 0.610114141 | 1.014942985 | 0.32912849 | 2.27(1.64-2.90) |
| Deaths | 148 | Kingdom of Morocco | 2 | Female | 24 | 15-49 years | 532 | Inflammatory bowel disease | 3 | Rate | 2021 | 0.057357871 | 0.145414779 | 0.022904765 | Number | 2021 | 5.55555741 | 14.08455617 | 2.218505269 | 0.15(-0.08-0.39) |
| Deaths | 90 | Kingdom of Norway | 2 | Female | 24 | 15-49 years | 532 | Inflammatory bowel disease | 3 | Rate | 2021 | 0.084798496 | 0.089688958 | 0.080479428 | Number | 2021 | 1.027007184 | 1.086236298 | 0.974698305 | -2.42(-3.14--1.69) |
| Deaths | 152 | Kingdom of Saudi Arabia | 2 | Female | 24 | 15-49 years | 532 | Inflammatory bowel disease | 3 | Rate | 2021 | 0.055080606 | 0.103634758 | 0.027304155 | Number | 2021 | 5.588577252 | 10.5149688 | 2.770328643 | 0.10(-0.37-0.57) |
| Deaths | 92 | Kingdom of Spain | 2 | Female | 24 | 15-49 years | 532 | Inflammatory bowel disease | 3 | Rate | 2021 | 0.045777436 | 0.052337341 | 0.039480928 | Number | 2021 | 4.533432846 | 5.183073602 | 3.909876869 | -0.15(-0.78-0.48) |
| Deaths | 93 | Kingdom of Sweden | 2 | Female | 24 | 15-49 years | 532 | Inflammatory bowel disease | 3 | Rate | 2021 | 0.034175743 | 0.040632339 | 0.02897025 | Number | 2021 | 0.750826732 | 0.892675427 | 0.636464235 | -6.75(-8.22--5.27) |
| Deaths | 18 | Kingdom of Thailand | 2 | Female | 24 | 15-49 years | 532 | Inflammatory bowel disease | 3 | Rate | 2021 | 0.020021391 | 0.032461151 | 0.00985053 | Number | 2021 | 3.263773566 | 5.291632614 | 1.605777511 | 1.02(0.72-1.34) |
| Deaths | 89 | Kingdom of the Netherlands | 2 | Female | 24 | 15-49 years | 532 | Inflammatory bowel disease | 3 | Rate | 2021 | 0.271135706 | 0.299227974 | 0.241054957 | Number | 2021 | 9.949631026 | 10.98050853 | 8.845783959 | -0.22(-0.91-0.47) |
| Deaths | 29 | Kingdom of Tonga | 2 | Female | 24 | 15-49 years | 532 | Inflammatory bowel disease | 3 | Rate | 2021 | 0.029209494 | 0.06479946 | 0.012592962 | Number | 2021 | 0.007385235 | 0.016383688 | 0.003183964 | 0.16(0.08-0.25) |
| Deaths | 37 | Kyrgyz Republic | 2 | Female | 24 | 15-49 years | 532 | Inflammatory bowel disease | 3 | Rate | 2021 | 0.080268616 | 0.10022559 | 0.061609292 | Number | 2021 | 1.383923317 | 1.728004514 | 1.062215095 | -5.43(-6.64--4.20) |
| Deaths | 12 | Lao People's Democratic Republic | 2 | Female | 24 | 15-49 years | 532 | Inflammatory bowel disease | 3 | Rate | 2021 | 0.038058953 | 0.070073244 | 0.014561597 | Number | 2021 | 0.755217152 | 1.39048796 | 0.288950887 | -0.93(-1.02--0.85) |
| Deaths | 146 | Lebanese Republic | 2 | Female | 24 | 15-49 years | 532 | Inflammatory bowel disease | 3 | Rate | 2021 | 0.07273822 | 0.111611669 | 0.046495063 | Number | 2021 | 1.079143253 | 1.65586923 | 0.689800132 | -1.98(-2.17--1.78) |
| Deaths | 13 | Malaysia | 2 | Female | 24 | 15-49 years | 532 | Inflammatory bowel disease | 3 | Rate | 2021 | 0.006921009 | 0.010578607 | 0.004408558 | Number | 2021 | 0.583213224 | 0.891428285 | 0.37149632 | -0.96(-1.17--0.74) |
| Deaths | 38 | Mongolia | 2 | Female | 24 | 15-49 years | 532 | Inflammatory bowel disease | 3 | Rate | 2021 | 0.125811525 | 0.227416787 | 0.064994537 | Number | 2021 | 1.061630363 | 1.919001983 | 0.548440808 | -2.01(-2.19--1.82) |
| Deaths | 50 | Montenegro | 2 | Female | 24 | 15-49 years | 532 | Inflammatory bowel disease | 3 | Rate | 2021 | 0.116876469 | 0.1831139 | 0.065374757 | Number | 2021 | 0.168329675 | 0.263727195 | 0.094155065 | -0.48(-0.83--0.14) |
| Deaths | 72 | New Zealand | 2 | Female | 24 | 15-49 years | 532 | Inflammatory bowel disease | 3 | Rate | 2021 | 0.060445619 | 0.067921082 | 0.053962657 | Number | 2021 | 0.722173858 | 0.811486937 | 0.644718696 | -0.90(-2.08-0.29) |
| Deaths | 49 | North Macedonia | 2 | Female | 24 | 15-49 years | 532 | Inflammatory bowel disease | 3 | Rate | 2021 | 0.04037761 | 0.071232066 | 0.017131215 | Number | 2021 | 0.214291879 | 0.378042519 | 0.090918711 | -0.69(-0.99--0.38) |
| Deaths | 376 | Northern Mariana Islands | 2 | Female | 24 | 15-49 years | 532 | Inflammatory bowel disease | 3 | Rate | 2021 | 0.002351149 | 0.004116248 | 0.001385876 | Number | 2021 | 0.000269089 | 0.000471104 | 0.000158613 | 0.51(-0.90-1.94) |
| Deaths | 149 | Palestine | 2 | Female | 24 | 15-49 years | 532 | Inflammatory bowel disease | 3 | Rate | 2021 | 0.095572512 | 0.149649739 | 0.060263307 | Number | 2021 | 1.24444992 | 1.948589624 | 0.784688674 | -2.61(-3.00--2.22) |
| Deaths | 139 | People's Democratic Republic of Algeria | 2 | Female | 24 | 15-49 years | 532 | Inflammatory bowel disease | 3 | Rate | 2021 | 0.044015455 | 0.124051271 | 0.018141928 | Number | 2021 | 4.939994344 | 13.92266818 | 2.036126148 | 0.10(-0.04-0.24) |
| Deaths | 161 | People's Republic of Bangladesh | 2 | Female | 24 | 15-49 years | 532 | Inflammatory bowel disease | 3 | Rate | 2021 | 0.12660192 | 0.201684688 | 0.072119391 | Number | 2021 | 58.23093106 | 92.76547394 | 33.17152904 | -0.07(-0.24-0.10) |
| Deaths | 6 | People's Republic of China | 2 | Female | 24 | 15-49 years | 532 | Inflammatory bowel disease | 3 | Rate | 2021 | 0.034187975 | 0.057777446 | 0.019366979 | Number | 2021 | 108.9561942 | 184.1352316 | 61.72206197 | -3.08(-3.33--2.84) |
| Deaths | 121 | Plurinational State of Bolivia | 2 | Female | 24 | 15-49 years | 532 | Inflammatory bowel disease | 3 | Rate | 2021 | 0.058003059 | 0.102267484 | 0.031169664 | Number | 2021 | 1.808521907 | 3.188676396 | 0.971862878 | -1.55(-1.65--1.46) |
| Deaths | 91 | Portuguese Republic | 2 | Female | 24 | 15-49 years | 532 | Inflammatory bowel disease | 3 | Rate | 2021 | 0.124574626 | 0.141426009 | 0.109369957 | Number | 2021 | 2.899947839 | 3.292227818 | 2.546001368 | 0.28(-0.26-0.81) |
| Deaths | 74 | Principality of Andorra | 2 | Female | 24 | 15-49 years | 532 | Inflammatory bowel disease | 3 | Rate | 2021 | 0.074680337 | 0.132874698 | 0.0337412 | Number | 2021 | 0.01492663 | 0.026558148 | 0.006743976 | 0.03(-0.24-0.29) |
| Deaths | 367 | Principality of Monaco | 2 | Female | 24 | 15-49 years | 532 | Inflammatory bowel disease | 3 | Rate | 2021 | 0.061608383 | 0.099851784 | 0.034004711 | Number | 2021 | 0.004399149 | 0.00712992 | 0.002428107 | -0.14(-0.29-0.01) |
| Deaths | 385 | Puerto Rico | 2 | Female | 24 | 15-49 years | 532 | Inflammatory bowel disease | 3 | Rate | 2021 | 0.110145866 | 0.135750215 | 0.085899868 | Number | 2021 | 0.825935429 | 1.017931192 | 0.644125353 | -3.77(-4.19--3.34) |
| Deaths | 43 | Republic of Albania | 2 | Female | 24 | 15-49 years | 532 | Inflammatory bowel disease | 3 | Rate | 2021 | 0.136746377 | 0.230562081 | 0.072963785 | Number | 2021 | 0.839237601 | 1.415001786 | 0.447792133 | -1.34(-1.66--1.02) |
| Deaths | 168 | Republic of Angola | 2 | Female | 24 | 15-49 years | 532 | Inflammatory bowel disease | 3 | Rate | 2021 | 0.086125682 | 0.150140005 | 0.034502246 | Number | 2021 | 6.610163709 | 11.52327612 | 2.648054421 | 0.03(-0.18-0.24) |
| Deaths | 33 | Republic of Armenia | 2 | Female | 24 | 15-49 years | 532 | Inflammatory bowel disease | 3 | Rate | 2021 | 0.076518675 | 0.093185803 | 0.060350941 | Number | 2021 | 0.563791813 | 0.686595699 | 0.444667484 | -1.38(-1.84--0.93) |
| Deaths | 75 | Republic of Austria | 2 | Female | 24 | 15-49 years | 532 | Inflammatory bowel disease | 3 | Rate | 2021 | 0.070873887 | 0.080466774 | 0.063043663 | Number | 2021 | 1.399412381 | 1.588824939 | 1.244803776 | -0.16(-0.82-0.50) |
| Deaths | 34 | Republic of Azerbaijan | 2 | Female | 24 | 15-49 years | 532 | Inflammatory bowel disease | 3 | Rate | 2021 | 0.026321461 | 0.050321817 | 0.011418729 | Number | 2021 | 0.72149929 | 1.379374629 | 0.312999542 | -1.76(-1.92--1.60) |
| Deaths | 57 | Republic of Belarus | 2 | Female | 24 | 15-49 years | 532 | Inflammatory bowel disease | 3 | Rate | 2021 | 0.101748014 | 0.148559622 | 0.071477283 | Number | 2021 | 2.157745558 | 3.150468003 | 1.515801477 | -0.19(-0.55-0.17) |
| Deaths | 200 | Republic of Benin | 2 | Female | 24 | 15-49 years | 532 | Inflammatory bowel disease | 3 | Rate | 2021 | 0.867162416 | 1.536838533 | 0.365896708 | Number | 2021 | 28.13180615 | 49.85691597 | 11.87013538 | 0.57(0.42-0.72) |
| Deaths | 193 | Republic of Botswana | 2 | Female | 24 | 15-49 years | 532 | Inflammatory bowel disease | 3 | Rate | 2021 | 0.084652253 | 0.150764822 | 0.036840627 | Number | 2021 | 0.575950625 | 1.025762348 | 0.250653488 | 0.02(-0.72-0.77) |
| Deaths | 45 | Republic of Bulgaria | 2 | Female | 24 | 15-49 years | 532 | Inflammatory bowel disease | 3 | Rate | 2021 | 0.056584271 | 0.07347617 | 0.042720967 | Number | 2021 | 0.806021647 | 1.046640382 | 0.608544092 | 1.27(0.59-1.95) |
| Deaths | 175 | Republic of Burundi | 2 | Female | 24 | 15-49 years | 532 | Inflammatory bowel disease | 3 | Rate | 2021 | 0.089374621 | 0.150317609 | 0.044043019 | Number | 2021 | 2.795201389 | 4.701200231 | 1.377450405 | -0.99(-1.18--0.80) |
| Deaths | 203 | Republic of Cabo Verde | 2 | Female | 24 | 15-49 years | 532 | Inflammatory bowel disease | 3 | Rate | 2021 | 0.502070281 | 0.857316207 | 0.253655213 | Number | 2021 | 0.754594602 | 1.28851718 | 0.381235182 | -2.19(-2.31--2.08) |
| Deaths | 202 | Republic of Cameroon | 2 | Female | 24 | 15-49 years | 532 | Inflammatory bowel disease | 3 | Rate | 2021 | 0.825230936 | 1.43927064 | 0.37676814 | Number | 2021 | 64.63773853 | 112.7335334 | 29.51106103 | 0.25(0.14-0.35) |
| Deaths | 204 | Republic of Chad | 2 | Female | 24 | 15-49 years | 532 | Inflammatory bowel disease | 3 | Rate | 2021 | 0.902378897 | 1.617136409 | 0.417836998 | Number | 2021 | 34.90384291 | 62.55052659 | 16.16185507 | 1.01(0.88-1.13) |
| Deaths | 98 | Republic of Chile | 2 | Female | 24 | 15-49 years | 532 | Inflammatory bowel disease | 3 | Rate | 2021 | 0.066724206 | 0.074949767 | 0.059388856 | Number | 2021 | 3.142825456 | 3.530263558 | 2.797317781 | -1.62(-2.12--1.12) |
| Deaths | 125 | Republic of Colombia | 2 | Female | 24 | 15-49 years | 532 | Inflammatory bowel disease | 3 | Rate | 2021 | 0.076746299 | 0.093133111 | 0.062196638 | Number | 2021 | 10.05405787 | 12.20079287 | 8.147996822 | 0.80(0.52-1.09) |
| Deaths | 126 | Republic of Costa Rica | 2 | Female | 24 | 15-49 years | 532 | Inflammatory bowel disease | 3 | Rate | 2021 | 0.049237644 | 0.056941785 | 0.041440316 | Number | 2021 | 0.6373971 | 0.737129677 | 0.53645819 | 1.02(0.57-1.48) |
| Deaths | 46 | Republic of Croatia | 2 | Female | 24 | 15-49 years | 532 | Inflammatory bowel disease | 3 | Rate | 2021 | 0.064249593 | 0.076571612 | 0.052513168 | Number | 2021 | 0.576349467 | 0.686883858 | 0.471068145 | -0.69(-1.30--0.07) |
| Deaths | 109 | Republic of Cuba | 2 | Female | 24 | 15-49 years | 532 | Inflammatory bowel disease | 3 | Rate | 2021 | 0.063577511 | 0.077687187 | 0.050923974 | Number | 2021 | 1.582369435 | 1.933542665 | 1.267437781 | -3.40(-3.74--3.06) |
| Deaths | 77 | Republic of Cyprus | 2 | Female | 24 | 15-49 years | 532 | Inflammatory bowel disease | 3 | Rate | 2021 | 0.133048423 | 0.24368346 | 0.075905294 | Number | 2021 | 0.475143965 | 0.870245 | 0.271073806 | -2.44(-2.64--2.23) |
| Deaths | 205 | Republic of C么te d'Ivoire | 2 | Female | 24 | 15-49 years | 532 | Inflammatory bowel disease | 3 | Rate | 2021 | 0.912743613 | 1.627253934 | 0.390126733 | Number | 2021 | 60.77792972 | 108.3558666 | 25.97782643 | 1.89(1.70-2.08) |
| Deaths | 177 | Republic of Djibouti | 2 | Female | 24 | 15-49 years | 532 | Inflammatory bowel disease | 3 | Rate | 2021 | 0.088219694 | 0.150514552 | 0.043618847 | Number | 2021 | 0.283443851 | 0.483592976 | 0.140144378 | -0.43(-0.65--0.22) |
| Deaths | 122 | Republic of Ecuador | 2 | Female | 24 | 15-49 years | 532 | Inflammatory bowel disease | 3 | Rate | 2021 | 0.026049469 | 0.033737072 | 0.019229627 | Number | 2021 | 1.228379137 | 1.590892913 | 0.906785163 | -3.09(-3.55--2.64) |
| Deaths | 127 | Republic of El Salvador | 2 | Female | 24 | 15-49 years | 532 | Inflammatory bowel disease | 3 | Rate | 2021 | 0.055503448 | 0.08524676 | 0.032630709 | Number | 2021 | 0.985899806 | 1.514225991 | 0.579614606 | -0.43(-0.62--0.23) |
| Deaths | 172 | Republic of Equatorial Guinea | 2 | Female | 24 | 15-49 years | 532 | Inflammatory bowel disease | 3 | Rate | 2021 | 0.099218242 | 0.186275734 | 0.036296755 | Number | 2021 | 0.361621611 | 0.67892083 | 0.132291106 | -1.38(-1.64--1.12) |
| Deaths | 58 | Republic of Estonia | 2 | Female | 24 | 15-49 years | 532 | Inflammatory bowel disease | 3 | Rate | 2021 | 0.050673946 | 0.060064543 | 0.041989303 | Number | 2021 | 0.141058679 | 0.167198841 | 0.116883647 | -7.05(-9.22--4.83) |
| Deaths | 22 | Republic of Fiji | 2 | Female | 24 | 15-49 years | 532 | Inflammatory bowel disease | 3 | Rate | 2021 | 0.027571311 | 0.051285577 | 0.013776064 | Number | 2021 | 0.0629684 | 0.117127937 | 0.031462295 | -0.35(-0.61--0.08) |
| Deaths | 79 | Republic of Finland | 2 | Female | 24 | 15-49 years | 532 | Inflammatory bowel disease | 3 | Rate | 2021 | 0.040241152 | 0.04555564 | 0.035743017 | Number | 2021 | 0.457349554 | 0.517749885 | 0.40622726 | 0.28(-0.51-1.08) |
| Deaths | 207 | Republic of Ghana | 2 | Female | 24 | 15-49 years | 532 | Inflammatory bowel disease | 3 | Rate | 2021 | 0.711665141 | 1.340787651 | 0.317949839 | Number | 2021 | 64.97730549 | 122.4182046 | 29.02983808 | -0.24(-0.34--0.15) |
| Deaths | 128 | Republic of Guatemala | 2 | Female | 24 | 15-49 years | 532 | Inflammatory bowel disease | 3 | Rate | 2021 | 0.086775277 | 0.104783995 | 0.07179179 | Number | 2021 | 3.814099299 | 4.605650084 | 3.155518769 | -0.60(-1.24-0.04) |
| Deaths | 208 | Republic of Guinea | 2 | Female | 24 | 15-49 years | 532 | Inflammatory bowel disease | 3 | Rate | 2021 | 0.874739855 | 1.433385181 | 0.431897654 | Number | 2021 | 29.0290922 | 47.56828027 | 14.3329434 | 0.94(0.82-1.06) |
| Deaths | 209 | Republic of Guinea-Bissau | 2 | Female | 24 | 15-49 years | 532 | Inflammatory bowel disease | 3 | Rate | 2021 | 1.49658245 | 2.47004921 | 0.799028512 | Number | 2021 | 7.861713322 | 12.975442 | 4.197385246 | 1.11(0.99-1.23) |
| Deaths | 113 | Republic of Guyana | 2 | Female | 24 | 15-49 years | 532 | Inflammatory bowel disease | 3 | Rate | 2021 | 0.423665889 | 0.587749257 | 0.289284351 | Number | 2021 | 0.860864738 | 1.194272711 | 0.587809175 | 0.00(-0.43-0.43) |
| Deaths | 114 | Republic of Haiti | 2 | Female | 24 | 15-49 years | 532 | Inflammatory bowel disease | 3 | Rate | 2021 | 0.385493788 | 0.754529458 | 0.151113637 | Number | 2021 | 13.64644268 | 26.71026959 | 5.349408075 | -0.28(-0.40--0.16) |
| Deaths | 129 | Republic of Honduras | 2 | Female | 24 | 15-49 years | 532 | Inflammatory bowel disease | 3 | Rate | 2021 | 0.140847543 | 0.260739392 | 0.061531794 | Number | 2021 | 3.997937733 | 7.401051039 | 1.746571326 | -1.21(-1.33--1.08) |
| Deaths | 83 | Republic of Iceland | 2 | Female | 24 | 15-49 years | 532 | Inflammatory bowel disease | 3 | Rate | 2021 | 0.17840047 | 0.207510912 | 0.153615561 | Number | 2021 | 0.142065682 | 0.165247205 | 0.12232871 | 0.87(0.35-1.40) |
| Deaths | 163 | Republic of India | 2 | Female | 24 | 15-49 years | 532 | Inflammatory bowel disease | 3 | Rate | 2021 | 0.094427079 | 0.172616046 | 0.053810378 | Number | 2021 | 357.2074786 | 652.9879221 | 203.5588686 | -2.01(-2.23--1.77) |
| Deaths | 11 | Republic of Indonesia | 2 | Female | 24 | 15-49 years | 532 | Inflammatory bowel disease | 3 | Rate | 2021 | 0.048614389 | 0.074431511 | 0.025839881 | Number | 2021 | 36.60350856 | 56.04214141 | 19.45576892 | -2.26(-2.44--2.08) |
| Deaths | 143 | Republic of Iraq | 2 | Female | 24 | 15-49 years | 532 | Inflammatory bowel disease | 3 | Rate | 2021 | 0.100403098 | 0.166204628 | 0.052651705 | Number | 2021 | 10.58501154 | 17.52214769 | 5.550813889 | -1.45(-1.64--1.27) |
| Deaths | 86 | Republic of Italy | 2 | Female | 24 | 15-49 years | 532 | Inflammatory bowel disease | 3 | Rate | 2021 | 0.129902957 | 0.142274388 | 0.121654136 | Number | 2021 | 15.76156191 | 17.26262918 | 14.76070478 | 2.30(1.75-2.85) |
| Deaths | 36 | Republic of Kazakhstan | 2 | Female | 24 | 15-49 years | 532 | Inflammatory bowel disease | 3 | Rate | 2021 | 0.266148871 | 0.346893791 | 0.201376417 | Number | 2021 | 12.6042112 | 16.42810882 | 9.536733677 | -0.33(-0.74-0.09) |
| Deaths | 180 | Republic of Kenya | 2 | Female | 24 | 15-49 years | 532 | Inflammatory bowel disease | 3 | Rate | 2021 | 0.098659854 | 0.161617183 | 0.050259269 | Number | 2021 | 13.09476884 | 21.45086946 | 6.670732703 | 0.48(0.34-0.61) |
| Deaths | 23 | Republic of Kiribati | 2 | Female | 24 | 15-49 years | 532 | Inflammatory bowel disease | 3 | Rate | 2021 | 0.029464617 | 0.053874866 | 0.013141663 | Number | 2021 | 0.0094202 | 0.017224456 | 0.004201551 | 0.57(0.34-0.80) |
| Deaths | 68 | Republic of Korea | 2 | Female | 24 | 15-49 years | 532 | Inflammatory bowel disease | 3 | Rate | 2021 | 0.05024661 | 0.098954139 | 0.032638833 | Number | 2021 | 5.824963372 | 11.4715049 | 3.783737942 | -4.32(-4.67--3.98) |
| Deaths | 59 | Republic of Latvia | 2 | Female | 24 | 15-49 years | 532 | Inflammatory bowel disease | 3 | Rate | 2021 | 0.078951076 | 0.095174106 | 0.063360804 | Number | 2021 | 0.307658435 | 0.370876723 | 0.246905888 | -5.82(-8.01--3.57) |
| Deaths | 210 | Republic of Liberia | 2 | Female | 24 | 15-49 years | 532 | Inflammatory bowel disease | 3 | Rate | 2021 | 0.80232217 | 1.500554826 | 0.384595824 | Number | 2021 | 11.19505982 | 20.9377251 | 5.366389481 | 1.12(0.94-1.31) |
| Deaths | 60 | Republic of Lithuania | 2 | Female | 24 | 15-49 years | 532 | Inflammatory bowel disease | 3 | Rate | 2021 | 0.047994738 | 0.057414813 | 0.039382199 | Number | 2021 | 0.27497486 | 0.32894502 | 0.22563129 | -5.05(-7.10--2.96) |
| Deaths | 181 | Republic of Madagascar | 2 | Female | 24 | 15-49 years | 532 | Inflammatory bowel disease | 3 | Rate | 2021 | 0.130268042 | 0.236022299 | 0.065888051 | Number | 2021 | 9.435836953 | 17.09604205 | 4.772535911 | 0.16(0.02-0.29) |
| Deaths | 182 | Republic of Malawi | 2 | Female | 24 | 15-49 years | 532 | Inflammatory bowel disease | 3 | Rate | 2021 | 0.097803225 | 0.167636285 | 0.048980209 | Number | 2021 | 4.899230539 | 8.397359207 | 2.453552402 | -0.24(-0.36--0.13) |
| Deaths | 14 | Republic of Maldives | 2 | Female | 24 | 15-49 years | 532 | Inflammatory bowel disease | 3 | Rate | 2021 | 0.020884267 | 0.039138232 | 0.010153894 | Number | 2021 | 0.024057009 | 0.04508412 | 0.011696475 | -1.74(-1.93--1.54) |
| Deaths | 211 | Republic of Mali | 2 | Female | 24 | 15-49 years | 532 | Inflammatory bowel disease | 3 | Rate | 2021 | 1.352822004 | 2.136675404 | 0.721356019 | Number | 2021 | 73.65219122 | 116.3278132 | 39.27305389 | 0.54(0.46-0.63) |
| Deaths | 88 | Republic of Malta | 2 | Female | 24 | 15-49 years | 532 | Inflammatory bowel disease | 3 | Rate | 2021 | 0.122896836 | 0.142234036 | 0.1037949 | Number | 2021 | 0.115858829 | 0.134088634 | 0.097850815 | 1.56(1.03-2.10) |
| Deaths | 183 | Republic of Mauritius | 2 | Female | 24 | 15-49 years | 532 | Inflammatory bowel disease | 3 | Rate | 2021 | 0.108680764 | 0.124360607 | 0.092527698 | Number | 2021 | 0.343973111 | 0.393599595 | 0.292848881 | 3.54(1.31-5.82) |
| Deaths | 61 | Republic of Moldova | 2 | Female | 24 | 15-49 years | 532 | Inflammatory bowel disease | 3 | Rate | 2021 | 0.045841032 | 0.054159997 | 0.038385034 | Number | 2021 | 0.404357815 | 0.477738331 | 0.338589422 | -5.33(-7.38--3.24) |
| Deaths | 184 | Republic of Mozambique | 2 | Female | 24 | 15-49 years | 532 | Inflammatory bowel disease | 3 | Rate | 2021 | 0.094633611 | 0.172669914 | 0.048245999 | Number | 2021 | 7.184854222 | 13.1095934 | 3.66297413 | 0.44(0.38-0.51) |
| Deaths | 195 | Republic of Namibia | 2 | Female | 24 | 15-49 years | 532 | Inflammatory bowel disease | 3 | Rate | 2021 | 0.099175689 | 0.199627244 | 0.036865854 | Number | 2021 | 0.655861993 | 1.320161461 | 0.243798786 | -0.81(-0.97--0.64) |
| Deaths | 369 | Republic of Nauru | 2 | Female | 24 | 15-49 years | 532 | Inflammatory bowel disease | 3 | Rate | 2021 | 0.027405703 | 0.053761897 | 0.012024685 | Number | 2021 | 0.000780358 | 0.001530832 | 0.000342394 | -0.60(-0.92--0.28) |
| Deaths | 131 | Republic of Nicaragua | 2 | Female | 24 | 15-49 years | 532 | Inflammatory bowel disease | 3 | Rate | 2021 | 0.035831701 | 0.053113108 | 0.020612045 | Number | 2021 | 0.649589252 | 0.962882119 | 0.373673669 | -0.04(-0.26-0.17) |
| Deaths | 374 | Republic of Niue | 2 | Female | 24 | 15-49 years | 532 | Inflammatory bowel disease | 3 | Rate | 2021 | 0.03035283 | 0.06060423 | 0.012672555 | Number | 2021 | 0.000116478 | 0.000232567 | 4.86E-05 | -0.33(-0.49--0.17) |
| Deaths | 380 | Republic of Palau | 2 | Female | 24 | 15-49 years | 532 | Inflammatory bowel disease | 3 | Rate | 2021 | 0.030081591 | 0.05593286 | 0.013719109 | Number | 2021 | 0.001126687 | 0.002094929 | 0.00051384 | 0.73(0.62-0.84) |
| Deaths | 132 | Republic of Panama | 2 | Female | 24 | 15-49 years | 532 | Inflammatory bowel disease | 3 | Rate | 2021 | 0.181925934 | 0.224176249 | 0.1417556 | Number | 2021 | 1.944580824 | 2.396188528 | 1.515205755 | 1.18(0.84-1.51) |
| Deaths | 136 | Republic of Paraguay | 2 | Female | 24 | 15-49 years | 532 | Inflammatory bowel disease | 3 | Rate | 2021 | 0.053264492 | 0.083338359 | 0.028387364 | Number | 2021 | 1.010436258 | 1.580942506 | 0.538513011 | 0.42(0.26-0.58) |
| Deaths | 123 | Republic of Peru | 2 | Female | 24 | 15-49 years | 532 | Inflammatory bowel disease | 3 | Rate | 2021 | 0.039243791 | 0.067996885 | 0.023143658 | Number | 2021 | 3.774800019 | 6.54051599 | 2.226152923 | -3.12(-3.62--2.62) |
| Deaths | 51 | Republic of Poland | 2 | Female | 24 | 15-49 years | 532 | Inflammatory bowel disease | 3 | Rate | 2021 | 0.112106613 | 0.128315976 | 0.096571812 | Number | 2021 | 9.896841405 | 11.32781402 | 8.525419489 | -0.56(-0.98--0.13) |
| Deaths | 185 | Republic of Rwanda | 2 | Female | 24 | 15-49 years | 532 | Inflammatory bowel disease | 3 | Rate | 2021 | 0.107288498 | 0.199447804 | 0.048771798 | Number | 2021 | 3.778218548 | 7.023654994 | 1.717523454 | -0.74(-1.06--0.42) |
| Deaths | 396 | Republic of San Marino | 2 | Female | 24 | 15-49 years | 532 | Inflammatory bowel disease | 3 | Rate | 2021 | 0.01626383 | 0.028500834 | 0.00782967 | Number | 2021 | 0.001158293 | 0.002029799 | 0.000557621 | 0.24(-0.24-0.73) |
| Deaths | 216 | Republic of Senegal | 2 | Female | 24 | 15-49 years | 532 | Inflammatory bowel disease | 3 | Rate | 2021 | 0.917144466 | 1.498164297 | 0.482631206 | Number | 2021 | 35.77777552 | 58.44334005 | 18.82742751 | 0.26(0.07-0.46) |
| Deaths | 53 | Republic of Serbia | 2 | Female | 24 | 15-49 years | 532 | Inflammatory bowel disease | 3 | Rate | 2021 | 0.162355182 | 0.252307465 | 0.090255994 | Number | 2021 | 3.300260107 | 5.12875691 | 1.834670462 | -1.09(-1.29--0.89) |
| Deaths | 186 | Republic of Seychelles | 2 | Female | 24 | 15-49 years | 532 | Inflammatory bowel disease | 3 | Rate | 2021 | 0.02934712 | 0.048321702 | 0.014811666 | Number | 2021 | 0.007113955 | 0.011713532 | 0.003590455 | -0.55(-0.79--0.31) |
| Deaths | 217 | Republic of Sierra Leone | 2 | Female | 24 | 15-49 years | 532 | Inflammatory bowel disease | 3 | Rate | 2021 | 0.876189348 | 1.420957958 | 0.442662217 | Number | 2021 | 19.92641409 | 32.31561393 | 10.06708271 | 1.95(1.83-2.08) |
| Deaths | 69 | Republic of Singapore | 2 | Female | 24 | 15-49 years | 532 | Inflammatory bowel disease | 3 | Rate | 2021 | 0.002102688 | 0.002385564 | 0.001840996 | Number | 2021 | 0.030587011 | 0.034701909 | 0.026780281 | -8.05(-8.50--7.60) |
| Deaths | 55 | Republic of Slovenia | 2 | Female | 24 | 15-49 years | 532 | Inflammatory bowel disease | 3 | Rate | 2021 | 0.069002783 | 0.085967834 | 0.052732934 | Number | 2021 | 0.290235661 | 0.361593114 | 0.22180233 | -2.44(-3.17--1.71) |
| Deaths | 196 | Republic of South Africa | 2 | Female | 24 | 15-49 years | 532 | Inflammatory bowel disease | 3 | Rate | 2021 | 0.099263035 | 0.152537286 | 0.054761201 | Number | 2021 | 15.37358199 | 23.62454946 | 8.481262053 | -0.12(-1.20-0.97) |
| Deaths | 435 | Republic of South Sudan | 2 | Female | 24 | 15-49 years | 532 | Inflammatory bowel disease | 3 | Rate | 2021 | 0.098701631 | 0.186747042 | 0.043036986 | Number | 2021 | 2.291508238 | 4.335616158 | 0.999168987 | 0.16(-0.15-0.46) |
| Deaths | 522 | Republic of Sudan | 2 | Female | 24 | 15-49 years | 532 | Inflammatory bowel disease | 3 | Rate | 2021 | 0.058571039 | 0.137433338 | 0.022890179 | Number | 2021 | 6.612054303 | 15.51477852 | 2.584060509 | 1.02(0.84-1.21) |
| Deaths | 118 | Republic of Suriname | 2 | Female | 24 | 15-49 years | 532 | Inflammatory bowel disease | 3 | Rate | 2021 | 0.27377557 | 0.454881184 | 0.168948389 | Number | 2021 | 0.397318445 | 0.660149059 | 0.245187368 | -0.96(-1.20--0.71) |
| Deaths | 39 | Republic of Tajikistan | 2 | Female | 24 | 15-49 years | 532 | Inflammatory bowel disease | 3 | Rate | 2021 | 0.129403242 | 0.240102515 | 0.060432026 | Number | 2021 | 3.288649001 | 6.101956054 | 1.535817181 | -0.76(-1.07--0.45) |
| Deaths | 170 | Republic of the Congo | 2 | Female | 24 | 15-49 years | 532 | Inflammatory bowel disease | 3 | Rate | 2021 | 0.113125558 | 0.226389148 | 0.055537317 | Number | 2021 | 1.620830898 | 3.24363949 | 0.795722927 | 1.10(0.85-1.36) |
| Deaths | 206 | Republic of the Gambia | 2 | Female | 24 | 15-49 years | 532 | Inflammatory bowel disease | 3 | Rate | 2021 | 1.30106754 | 2.224827778 | 0.651498119 | Number | 2021 | 8.001283401 | 13.68220867 | 4.00657224 | 1.23(0.93-1.54) |
| Deaths | 24 | Republic of the Marshall Islands | 2 | Female | 24 | 15-49 years | 532 | Inflammatory bowel disease | 3 | Rate | 2021 | 0.028677476 | 0.05535532 | 0.012055825 | Number | 2021 | 0.004253297 | 0.008210018 | 0.001788058 | 0.20(-0.01-0.42) |
| Deaths | 213 | Republic of the Niger | 2 | Female | 24 | 15-49 years | 532 | Inflammatory bowel disease | 3 | Rate | 2021 | 0.785787248 | 1.597271361 | 0.33850391 | Number | 2021 | 41.89104448 | 85.15201265 | 18.04595632 | 0.26(0.07-0.45) |
| Deaths | 16 | Republic of the Philippines | 2 | Female | 24 | 15-49 years | 532 | Inflammatory bowel disease | 3 | Rate | 2021 | 0.032253146 | 0.050621886 | 0.020495197 | Number | 2021 | 9.454349142 | 14.83876919 | 6.007747272 | -1.23(-1.53--0.92) |
| Deaths | 15 | Republic of the Union of Myanmar | 2 | Female | 24 | 15-49 years | 532 | Inflammatory bowel disease | 3 | Rate | 2021 | 0.038604043 | 0.067411388 | 0.017605001 | Number | 2021 | 5.836125756 | 10.19119518 | 2.661508846 | -2.64(-2.85--2.42) |
| Deaths | 119 | Republic of Trinidad and Tobago | 2 | Female | 24 | 15-49 years | 532 | Inflammatory bowel disease | 3 | Rate | 2021 | 0.19440275 | 0.26951959 | 0.137913408 | Number | 2021 | 0.660707864 | 0.916004079 | 0.468720083 | -0.65(-1.09--0.21) |
| Deaths | 154 | Republic of Tunisia | 2 | Female | 24 | 15-49 years | 532 | Inflammatory bowel disease | 3 | Rate | 2021 | 0.033966322 | 0.090004056 | 0.013515887 | Number | 2021 | 1.042137844 | 2.761459816 | 0.414687737 | -0.11(-0.21--0.01) |
| Deaths | 155 | Republic of Turkey | 2 | Female | 24 | 15-49 years | 532 | Inflammatory bowel disease | 3 | Rate | 2021 | 0.089248283 | 0.132731941 | 0.05387277 | Number | 2021 | 19.323647 | 28.73853815 | 11.66429616 | -2.28(-2.52--2.04) |
| Deaths | 190 | Republic of Uganda | 2 | Female | 24 | 15-49 years | 532 | Inflammatory bowel disease | 3 | Rate | 2021 | 0.055965997 | 0.091805512 | 0.030100124 | Number | 2021 | 5.828130456 | 9.560349664 | 3.134536302 | 0.00(-0.31-0.32) |
| Deaths | 41 | Republic of Uzbekistan | 2 | Female | 24 | 15-49 years | 532 | Inflammatory bowel disease | 3 | Rate | 2021 | 0.116069176 | 0.151845567 | 0.087909092 | Number | 2021 | 10.32858662 | 13.51220146 | 7.822720018 | -0.08(-0.79-0.63) |
| Deaths | 30 | Republic of Vanuatu | 2 | Female | 24 | 15-49 years | 532 | Inflammatory bowel disease | 3 | Rate | 2021 | 0.03627597 | 0.077950805 | 0.01316062 | Number | 2021 | 0.028446327 | 0.061126252 | 0.010320091 | 0.49(0.31-0.67) |
| Deaths | 157 | Republic of Yemen | 2 | Female | 24 | 15-49 years | 532 | Inflammatory bowel disease | 3 | Rate | 2021 | 0.03926319 | 0.093107802 | 0.017658766 | Number | 2021 | 3.280696552 | 7.779766297 | 1.475505479 | 1.04(0.61-1.46) |
| Deaths | 191 | Republic of Zambia | 2 | Female | 24 | 15-49 years | 532 | Inflammatory bowel disease | 3 | Rate | 2021 | 0.111173685 | 0.18883996 | 0.054945678 | Number | 2021 | 5.468490236 | 9.288794181 | 2.70270706 | -0.04(-0.14-0.06) |
| Deaths | 198 | Republic of Zimbabwe | 2 | Female | 24 | 15-49 years | 532 | Inflammatory bowel disease | 3 | Rate | 2021 | 0.107095306 | 0.200198144 | 0.037586984 | Number | 2021 | 4.348748106 | 8.129313363 | 1.526269738 | 2.93(2.14-3.72) |
| Deaths | 52 | Romania | 2 | Female | 24 | 15-49 years | 532 | Inflammatory bowel disease | 3 | Rate | 2021 | 0.043101869 | 0.052327509 | 0.034851933 | Number | 2021 | 1.750190568 | 2.124806032 | 1.415194387 | -0.33(-0.61--0.04) |
| Deaths | 62 | Russian Federation | 2 | Female | 24 | 15-49 years | 532 | Inflammatory bowel disease | 3 | Rate | 2021 | 0.208050547 | 0.230932068 | 0.181335756 | Number | 2021 | 70.5161091 | 78.2715122 | 61.46146748 | -1.47(-2.11--0.83) |
| Deaths | 393 | Saint Kitts and Nevis | 2 | Female | 24 | 15-49 years | 532 | Inflammatory bowel disease | 3 | Rate | 2021 | 0.066054139 | 0.08491787 | 0.049282551 | Number | 2021 | 0.01031321 | 0.013258455 | 0.007694617 | -4.71(-5.26--4.16) |
| Deaths | 116 | Saint Lucia | 2 | Female | 24 | 15-49 years | 532 | Inflammatory bowel disease | 3 | Rate | 2021 | 0.253356216 | 0.325121927 | 0.192974495 | Number | 2021 | 0.115724167 | 0.148504208 | 0.08814393 | -1.30(-1.79--0.82) |
| Deaths | 117 | Saint Vincent and the Grenadines | 2 | Female | 24 | 15-49 years | 532 | Inflammatory bowel disease | 3 | Rate | 2021 | 0.381728932 | 0.468630012 | 0.305541984 | Number | 2021 | 0.106100908 | 0.130254916 | 0.084924875 | -0.81(-1.32--0.29) |
| Deaths | 54 | Slovak Republic | 2 | Female | 24 | 15-49 years | 532 | Inflammatory bowel disease | 3 | Rate | 2021 | 0.16459108 | 0.242102081 | 0.088523524 | Number | 2021 | 2.077507992 | 3.055870388 | 1.117365101 | 0.05(-0.16-0.27) |
| Deaths | 20 | Socialist Republic of Viet Nam | 2 | Female | 24 | 15-49 years | 532 | Inflammatory bowel disease | 3 | Rate | 2021 | 0.014729445 | 0.027328135 | 0.006968103 | Number | 2021 | 3.762138638 | 6.980047983 | 1.779766221 | -1.54(-1.82--1.26) |
| Deaths | 28 | Solomon Islands | 2 | Female | 24 | 15-49 years | 532 | Inflammatory bowel disease | 3 | Rate | 2021 | 0.014354456 | 0.025111518 | 0.007142832 | Number | 2021 | 0.024610066 | 0.043052562 | 0.012246062 | 1.80(1.71-1.89) |
| Deaths | 178 | State of Eritrea | 2 | Female | 24 | 15-49 years | 532 | Inflammatory bowel disease | 3 | Rate | 2021 | 0.133850271 | 0.222544674 | 0.073010458 | Number | 2021 | 2.215522789 | 3.683614469 | 1.208487147 | 0.19(0.06-0.32) |
| Deaths | 85 | State of Israel | 2 | Female | 24 | 15-49 years | 532 | Inflammatory bowel disease | 3 | Rate | 2021 | 0.034840274 | 0.039445993 | 0.030497116 | Number | 2021 | 0.775002621 | 0.877454288 | 0.678391458 | 0.62(-0.04-1.28) |
| Deaths | 145 | State of Kuwait | 2 | Female | 24 | 15-49 years | 532 | Inflammatory bowel disease | 3 | Rate | 2021 | 0.037349009 | 0.044815867 | 0.030470245 | Number | 2021 | 0.545949767 | 0.655096689 | 0.445399317 | 3.24(0.12-6.46) |
| Deaths | 147 | State of Libya | 2 | Female | 24 | 15-49 years | 532 | Inflammatory bowel disease | 3 | Rate | 2021 | 0.083803327 | 0.2095035 | 0.032654764 | Number | 2021 | 1.666983072 | 4.167361846 | 0.649555813 | 2.69(2.14-3.24) |
| Deaths | 151 | State of Qatar | 2 | Female | 24 | 15-49 years | 532 | Inflammatory bowel disease | 3 | Rate | 2021 | 0.076433354 | 0.153207388 | 0.042611578 | Number | 2021 | 0.424035857 | 0.849961738 | 0.236399897 | -2.56(-2.95--2.17) |
| Deaths | 150 | Sultanate of Oman | 2 | Female | 24 | 15-49 years | 532 | Inflammatory bowel disease | 3 | Rate | 2021 | 0.027152314 | 0.064881837 | 0.011144056 | Number | 2021 | 0.275728953 | 0.65886837 | 0.113166736 | -0.51(-0.75--0.27) |
| Deaths | 94 | Swiss Confederation | 2 | Female | 24 | 15-49 years | 532 | Inflammatory bowel disease | 3 | Rate | 2021 | 0.067447359 | 0.076279865 | 0.05978093 | Number | 2021 | 1.319648148 | 1.492461431 | 1.169649847 | -1.08(-1.82--0.33) |
| Deaths | 153 | Syrian Arab Republic | 2 | Female | 24 | 15-49 years | 532 | Inflammatory bowel disease | 3 | Rate | 2021 | 0.09986739 | 0.177410374 | 0.047533321 | Number | 2021 | 3.885295107 | 6.902069439 | 1.849262101 | -0.93(-1.21--0.66) |
| Deaths | 8 | Taiwan (Province of China) | 2 | Female | 24 | 15-49 years | 532 | Inflammatory bowel disease | 3 | Rate | 2021 | 0.044819548 | 0.05314274 | 0.037763168 | Number | 2021 | 2.517803464 | 2.985370968 | 2.121401031 | -3.12(-3.92--2.31) |
| Deaths | 218 | Togolese Republic | 2 | Female | 24 | 15-49 years | 532 | Inflammatory bowel disease | 3 | Rate | 2021 | 1.334228298 | 2.306404609 | 0.61476669 | Number | 2021 | 28.7701555 | 49.73333225 | 13.25630201 | 0.87(0.77-0.97) |
| Deaths | 413 | Tokelau | 2 | Female | 24 | 15-49 years | 532 | Inflammatory bowel disease | 3 | Rate | 2021 | 0.0288097 | 0.050093547 | 0.015886558 | Number | 2021 | 9.26E-05 | 0.000161083 | 5.11E-05 | -0.98(-1.24--0.73) |
| Deaths | 40 | Turkmenistan | 2 | Female | 24 | 15-49 years | 532 | Inflammatory bowel disease | 3 | Rate | 2021 | 0.175337326 | 0.310071142 | 0.087034064 | Number | 2021 | 2.203300841 | 3.896375198 | 1.09367601 | -0.21(-0.40--0.01) |
| Deaths | 416 | Tuvalu | 2 | Female | 24 | 15-49 years | 532 | Inflammatory bowel disease | 3 | Rate | 2021 | 0.02886038 | 0.051348597 | 0.015038922 | Number | 2021 | 0.000838173 | 0.001491283 | 0.000436765 | -1.79(-2.06--1.53) |
| Deaths | 63 | Ukraine | 2 | Female | 24 | 15-49 years | 532 | Inflammatory bowel disease | 3 | Rate | 2021 | 0.187335711 | 0.302258508 | 0.10524336 | Number | 2021 | 18.93075047 | 30.54399159 | 10.63510941 | 0.17(-0.17-0.51) |
| Deaths | 176 | Union of the Comoros | 2 | Female | 24 | 15-49 years | 532 | Inflammatory bowel disease | 3 | Rate | 2021 | 0.128252782 | 0.195400269 | 0.078483444 | Number | 2021 | 0.250378481 | 0.381465586 | 0.15321746 | -0.64(-1.18--0.09) |
| Deaths | 156 | United Arab Emirates | 2 | Female | 24 | 15-49 years | 532 | Inflammatory bowel disease | 3 | Rate | 2021 | 0.019459071 | 0.034364966 | 0.01041885 | Number | 2021 | 0.335471655 | 0.592447197 | 0.179619515 | -0.92(-1.46--0.37) |
| Deaths | 95 | United Kingdom of Great Britain and Northern Ireland | 2 | Female | 24 | 15-49 years | 532 | Inflammatory bowel disease | 3 | Rate | 2021 | 0.184102299 | 0.18945391 | 0.178846023 | Number | 2021 | 28.2404289 | 29.0613409 | 27.43414076 | 0.03(-0.66-0.74) |
| Deaths | 130 | United Mexican States | 2 | Female | 24 | 15-49 years | 532 | Inflammatory bowel disease | 3 | Rate | 2021 | 0.129465681 | 0.152460818 | 0.107874389 | Number | 2021 | 45.3699361 | 53.42834886 | 37.80348667 | 2.24(2.00-2.48) |
| Deaths | 189 | United Republic of Tanzania | 2 | Female | 24 | 15-49 years | 532 | Inflammatory bowel disease | 3 | Rate | 2021 | 0.09365938 | 0.164541574 | 0.047148822 | Number | 2021 | 13.91728618 | 24.45000365 | 7.006064488 | 0.54(0.34-0.75) |
| Deaths | 102 | United States of America | 2 | Female | 24 | 15-49 years | 532 | Inflammatory bowel disease | 3 | Rate | 2021 | 0.211042441 | 0.222216729 | 0.199619252 | Number | 2021 | 159.7889865 | 168.2495032 | 151.1400159 | 1.88(1.46-2.31) |
| Deaths | 422 | United States Virgin Islands | 2 | Female | 24 | 15-49 years | 532 | Inflammatory bowel disease | 3 | Rate | 2021 | 0.231423722 | 0.436134124 | 0.09318635 | Number | 2021 | 0.039809435 | 0.075023654 | 0.016029886 | -1.54(-1.96--1.13) |

| **Supplement Table 5. DALYs Rates and Numbers in 2021, and Estimated Annual Percentage Changes (EAPCs) from 1992 to 2021 for Inflammatory Bowel Disease among Women of Reproductive Age across 204 Countries and Territories.** | | | | | | | | | | | | | | | | | | | | | | |
| --- | --- | --- | --- | --- | --- | --- | --- | --- | --- | --- | --- | --- | --- | --- | --- | --- | --- | --- | --- | --- | --- | --- |
|  | measure_id | measure_name | location_id | location_name | sex_id | sex_name | age_id | age_name | cause_id | cause_name | metric_id | metric_name | year | val | upper | lower | metric_name | year | val | upper | lower | EAPCs |
| 177 | 2 | DALYs (Disability-Adjusted Life Years) | 298 | American Samoa | 2 | Female | 24 | 15-49 years | 532 | Inflammatory bowel disease | 3 | Rate | 2021 | 4.042810402 | 5.769949412 | 2.728794552 | Number | 2021 | 0.474347686 | 0.676994931 | 0.320172665 | 2.16(1.54-2.78) |
| 67 | 2 | DALYs (Disability-Adjusted Life Years) | 105 | Antigua and Barbuda | 2 | Female | 24 | 15-49 years | 532 | Inflammatory bowel disease | 3 | Rate | 2021 | 11.8628738 | 16.04988304 | 8.621869017 | Number | 2021 | 2.866554178 | 3.878306392 | 2.083395226 | -1.02(-1.21--0.83) |
| 62 | 2 | DALYs (Disability-Adjusted Life Years) | 141 | Arab Republic of Egypt | 2 | Female | 24 | 15-49 years | 532 | Inflammatory bowel disease | 3 | Rate | 2021 | 12.54874476 | 17.66078839 | 8.744297583 | Number | 2021 | 3256.113301 | 4582.572128 | 2268.945956 | -0.03(-0.18-0.12) |
| 121 | 2 | DALYs (Disability-Adjusted Life Years) | 97 | Argentine Republic | 2 | Female | 24 | 15-49 years | 532 | Inflammatory bowel disease | 3 | Rate | 2021 | 13.73469679 | 19.16137692 | 9.360875236 | Number | 2021 | 1632.547837 | 2277.579544 | 1112.662104 | -0.07(-0.20-0.07) |
| 25 | 2 | DALYs (Disability-Adjusted Life Years) | 71 | Australia | 2 | Female | 24 | 15-49 years | 532 | Inflammatory bowel disease | 3 | Rate | 2021 | 44.4440423 | 62.20636314 | 29.8147498 | Number | 2021 | 2677.457272 | 3747.518693 | 1796.139922 | 1.17(0.58-1.77) |
| 29 | 2 | DALYs (Disability-Adjusted Life Years) | 107 | Barbados | 2 | Female | 24 | 15-49 years | 532 | Inflammatory bowel disease | 3 | Rate | 2021 | 19.09911949 | 24.27605777 | 14.91050954 | Number | 2021 | 13.5964652 | 17.2818739 | 10.61463719 | -0.20(-0.55-0.16) |
| 178 | 2 | DALYs (Disability-Adjusted Life Years) | 108 | Belize | 2 | Female | 24 | 15-49 years | 532 | Inflammatory bowel disease | 3 | Rate | 2021 | 11.45996962 | 14.20714567 | 9.03796962 | Number | 2021 | 13.84267381 | 17.16103007 | 10.9171027 | -0.98(-1.29--0.67) |
| 17 | 2 | DALYs (Disability-Adjusted Life Years) | 305 | Bermuda | 2 | Female | 24 | 15-49 years | 532 | Inflammatory bowel disease | 3 | Rate | 2021 | 12.4679096 | 17.15916608 | 9.021222055 | Number | 2021 | 1.680930199 | 2.31340789 | 1.216245952 | -2.51(-2.85--2.17) |
| 8 | 2 | DALYs (Disability-Adjusted Life Years) | 133 | Bolivarian Republic of Venezuela | 2 | Female | 24 | 15-49 years | 532 | Inflammatory bowel disease | 3 | Rate | 2021 | 4.983811684 | 6.579862626 | 3.591168077 | Number | 2021 | 342.0765722 | 451.6255821 | 246.4889414 | 0.68(0.42-0.94) |
| 99 | 2 | DALYs (Disability-Adjusted Life Years) | 44 | Bosnia and Herzegovina | 2 | Female | 24 | 15-49 years | 532 | Inflammatory bowel disease | 3 | Rate | 2021 | 17.50651483 | 24.60422484 | 12.13607231 | Number | 2021 | 128.0784759 | 180.0056521 | 88.7880689 | -0.45(-0.56--0.34) |
| 9 | 2 | DALYs (Disability-Adjusted Life Years) | 66 | Brunei Darussalam | 2 | Female | 24 | 15-49 years | 532 | Inflammatory bowel disease | 3 | Rate | 2021 | 12.27291556 | 18.96823499 | 8.777219938 | Number | 2021 | 15.33362478 | 23.69867182 | 10.96614708 | -0.31(-0.52--0.10) |
| 38 | 2 | DALYs (Disability-Adjusted Life Years) | 201 | Burkina Faso | 2 | Female | 24 | 15-49 years | 532 | Inflammatory bowel disease | 3 | Rate | 2021 | 46.00241476 | 76.14953714 | 22.80264297 | Number | 2021 | 2526.837893 | 4182.77034 | 1252.512126 | 0.92(0.61-1.23) |
| 180 | 2 | DALYs (Disability-Adjusted Life Years) | 101 | Canada | 2 | Female | 24 | 15-49 years | 532 | Inflammatory bowel disease | 3 | Rate | 2021 | 76.19675894 | 109.5468267 | 49.6209278 | Number | 2021 | 6319.705948 | 9085.737267 | 4115.525081 | -1.24(-1.68--0.79) |
| 14 | 2 | DALYs (Disability-Adjusted Life Years) | 169 | Central African Republic | 2 | Female | 24 | 15-49 years | 532 | Inflammatory bowel disease | 3 | Rate | 2021 | 7.979945515 | 13.02619068 | 4.163259065 | Number | 2021 | 110.3992696 | 180.2119995 | 57.59697975 | 0.57(0.48-0.67) |
| 85 | 2 | DALYs (Disability-Adjusted Life Years) | 110 | Commonwealth of Dominica | 2 | Female | 24 | 15-49 years | 532 | Inflammatory bowel disease | 3 | Rate | 2021 | 10.87224755 | 14.74611311 | 7.706367284 | Number | 2021 | 1.787077301 | 2.42382671 | 1.266699823 | 0.38(0.29-0.46) |
| 169 | 2 | DALYs (Disability-Adjusted Life Years) | 106 | Commonwealth of the Bahamas | 2 | Female | 24 | 15-49 years | 532 | Inflammatory bowel disease | 3 | Rate | 2021 | 19.17807098 | 24.37114718 | 14.95538575 | Number | 2021 | 20.67770454 | 26.2768545 | 16.12482549 | -1.38(-1.65--1.11) |
| 196 | 2 | DALYs (Disability-Adjusted Life Years) | 320 | Cook Islands | 2 | Female | 24 | 15-49 years | 532 | Inflammatory bowel disease | 3 | Rate | 2021 | 2.37033637 | 3.639217773 | 1.556613843 | Number | 2021 | 0.102096404 | 0.156750347 | 0.067047309 | 0.14(0.03-0.25) |
| 35 | 2 | DALYs (Disability-Adjusted Life Years) | 47 | Czech Republic | 2 | Female | 24 | 15-49 years | 532 | Inflammatory bowel disease | 3 | Rate | 2021 | 54.8167121 | 76.47002424 | 37.19795271 | Number | 2021 | 1257.440632 | 1754.145988 | 853.2838868 | 1.05(0.53-1.57) |
| 41 | 2 | DALYs (Disability-Adjusted Life Years) | 7 | Democratic People's Republic of Korea | 2 | Female | 24 | 15-49 years | 532 | Inflammatory bowel disease | 3 | Rate | 2021 | 4.84711151 | 8.041895092 | 2.765055403 | Number | 2021 | 319.4172607 | 529.9486293 | 182.2129366 | -0.21(-0.27--0.14) |
| 133 | 2 | DALYs (Disability-Adjusted Life Years) | 215 | Democratic Republic of Sao Tome and Principe | 2 | Female | 24 | 15-49 years | 532 | Inflammatory bowel disease | 3 | Rate | 2021 | 34.94690087 | 81.86164973 | 14.02701934 | Number | 2021 | 19.60249046 | 45.91801184 | 7.868065722 | 0.24(-0.21-0.68) |
| 131 | 2 | DALYs (Disability-Adjusted Life Years) | 171 | Democratic Republic of the Congo | 2 | Female | 24 | 15-49 years | 532 | Inflammatory bowel disease | 3 | Rate | 2021 | 6.936206069 | 10.53811398 | 4.462188691 | Number | 2021 | 1477.931107 | 2245.407115 | 950.7802113 | -0.32(-0.54--0.11) |
| 42 | 2 | DALYs (Disability-Adjusted Life Years) | 19 | Democratic Republic of Timor-Leste | 2 | Female | 24 | 15-49 years | 532 | Inflammatory bowel disease | 3 | Rate | 2021 | 3.511756956 | 6.199705802 | 1.961558247 | Number | 2021 | 12.15811104 | 21.46410258 | 6.791142801 | -0.15(-0.68-0.37) |
| 163 | 2 | DALYs (Disability-Adjusted Life Years) | 17 | Democratic Socialist Republic of Sri Lanka | 2 | Female | 24 | 15-49 years | 532 | Inflammatory bowel disease | 3 | Rate | 2021 | 2.245342402 | 3.196703165 | 1.49559759 | Number | 2021 | 126.7970446 | 180.5214713 | 84.45810058 | 0.08(-0.26-0.42) |
| 139 | 2 | DALYs (Disability-Adjusted Life Years) | 111 | Dominican Republic | 2 | Female | 24 | 15-49 years | 532 | Inflammatory bowel disease | 3 | Rate | 2021 | 9.176337959 | 12.67582471 | 6.576836815 | Number | 2021 | 265.8215048 | 367.1951505 | 190.5187741 | -0.06(-0.22-0.11) |
| 127 | 2 | DALYs (Disability-Adjusted Life Years) | 99 | Eastern Republic of Uruguay | 2 | Female | 24 | 15-49 years | 532 | Inflammatory bowel disease | 3 | Rate | 2021 | 16.43978274 | 21.53916204 | 12.63896636 | Number | 2021 | 136.840683 | 179.2866543 | 105.2036281 | -0.38(-0.49--0.28) |
| 72 | 2 | DALYs (Disability-Adjusted Life Years) | 179 | Federal Democratic Republic of Ethiopia | 2 | Female | 24 | 15-49 years | 532 | Inflammatory bowel disease | 3 | Rate | 2021 | 5.754977976 | 8.62492709 | 3.820338925 | Number | 2021 | 1595.228861 | 2390.753305 | 1058.964072 | -0.87(-1.05--0.69) |
| 113 | 2 | DALYs (Disability-Adjusted Life Years) | 164 | Federal Democratic Republic of Nepal | 2 | Female | 24 | 15-49 years | 532 | Inflammatory bowel disease | 3 | Rate | 2021 | 15.46681531 | 21.82594081 | 10.60672639 | Number | 2021 | 1403.04139 | 1979.896812 | 962.1680887 | -0.94(-1.05--0.83) |
| 51 | 2 | DALYs (Disability-Adjusted Life Years) | 81 | Federal Republic of Germany | 2 | Female | 24 | 15-49 years | 532 | Inflammatory bowel disease | 3 | Rate | 2021 | 66.77205486 | 91.60643287 | 46.62643509 | Number | 2021 | 11371.76212 | 15601.23566 | 7940.817902 | 0.47(0.01-0.94) |
| 81 | 2 | DALYs (Disability-Adjusted Life Years) | 214 | Federal Republic of Nigeria | 2 | Female | 24 | 15-49 years | 532 | Inflammatory bowel disease | 3 | Rate | 2021 | 34.36581326 | 62.79874756 | 13.63233741 | Number | 2021 | 19733.11323 | 36059.52191 | 7827.792572 | 0.56(0.44-0.67) |
| 153 | 2 | DALYs (Disability-Adjusted Life Years) | 187 | Federal Republic of Somalia | 2 | Female | 24 | 15-49 years | 532 | Inflammatory bowel disease | 3 | Rate | 2021 | 6.242544186 | 10.82138858 | 3.73966444 | Number | 2021 | 301.9163663 | 523.3690338 | 180.8663047 | -0.71(-0.87--0.55) |
| 102 | 2 | DALYs (Disability-Adjusted Life Years) | 25 | Federated States of Micronesia | 2 | Female | 24 | 15-49 years | 532 | Inflammatory bowel disease | 3 | Rate | 2021 | 2.659337809 | 3.975700254 | 1.727437766 | Number | 2021 | 0.695414303 | 1.039641827 | 0.451723329 | -0.06(-0.11--0.02) |
| 129 | 2 | DALYs (Disability-Adjusted Life Years) | 135 | Federative Republic of Brazil | 2 | Female | 24 | 15-49 years | 532 | Inflammatory bowel disease | 3 | Rate | 2021 | 16.13847646 | 18.27992535 | 14.35922456 | Number | 2021 | 9475.84478 | 10733.21485 | 8431.141779 | 0.82(0.56-1.09) |
| 190 | 2 | DALYs (Disability-Adjusted Life Years) | 80 | French Republic | 2 | Female | 24 | 15-49 years | 532 | Inflammatory bowel disease | 3 | Rate | 2021 | 33.69155197 | 45.21434258 | 23.40107666 | Number | 2021 | 4783.30298 | 6419.23233 | 3322.329582 | -0.41(-0.69--0.14) |
| 150 | 2 | DALYs (Disability-Adjusted Life Years) | 173 | Gabonese Republic | 2 | Female | 24 | 15-49 years | 532 | Inflammatory bowel disease | 3 | Rate | 2021 | 7.29723008 | 11.38275307 | 4.24116408 | Number | 2021 | 35.72468052 | 55.72596897 | 20.76325265 | 0.25(0.05-0.44) |
| 28 | 2 | DALYs (Disability-Adjusted Life Years) | 35 | Georgia | 2 | Female | 24 | 15-49 years | 532 | Inflammatory bowel disease | 3 | Rate | 2021 | 14.79622673 | 19.88733521 | 10.53195812 | Number | 2021 | 116.4416948 | 156.5071324 | 82.88322933 | -0.15(-0.69-0.39) |
| 194 | 2 | DALYs (Disability-Adjusted Life Years) | 87 | Grand Duchy of Luxembourg | 2 | Female | 24 | 15-49 years | 532 | Inflammatory bowel disease | 3 | Rate | 2021 | 34.90738064 | 48.30486889 | 23.73630108 | Number | 2021 | 54.34543981 | 75.20327498 | 36.95378164 | 0.08(-0.11-0.28) |
| 138 | 2 | DALYs (Disability-Adjusted Life Years) | 349 | Greenland | 2 | Female | 24 | 15-49 years | 532 | Inflammatory bowel disease | 3 | Rate | 2021 | 46.02745869 | 63.56157826 | 30.52294694 | Number | 2021 | 5.858426442 | 8.090188801 | 3.884994839 | -0.44(-0.52--0.36) |
| 88 | 2 | DALYs (Disability-Adjusted Life Years) | 112 | Grenada | 2 | Female | 24 | 15-49 years | 532 | Inflammatory bowel disease | 3 | Rate | 2021 | 21.0892388 | 25.81049687 | 17.31565921 | Number | 2021 | 5.402011783 | 6.611362769 | 4.435408787 | -1.64(-1.90--1.38) |
| 61 | 2 | DALYs (Disability-Adjusted Life Years) | 351 | Guam | 2 | Female | 24 | 15-49 years | 532 | Inflammatory bowel disease | 3 | Rate | 2021 | 2.387637777 | 3.306890323 | 1.649189494 | Number | 2021 | 0.861424843 | 1.193077738 | 0.595003486 | 1.16(0.65-1.66) |
| 179 | 2 | DALYs (Disability-Adjusted Life Years) | 144 | Hashemite Kingdom of Jordan | 2 | Female | 24 | 15-49 years | 532 | Inflammatory bowel disease | 3 | Rate | 2021 | 11.57684745 | 15.87085692 | 7.989882669 | Number | 2021 | 358.7677934 | 491.8396254 | 247.6073548 | 0.39(0.29-0.48) |
| 166 | 2 | DALYs (Disability-Adjusted Life Years) | 82 | Hellenic Republic | 2 | Female | 24 | 15-49 years | 532 | Inflammatory bowel disease | 3 | Rate | 2021 | 10.08033344 | 14.03354701 | 6.719278669 | Number | 2021 | 218.4957465 | 304.1834228 | 145.6433774 | 1.03(0.40-1.67) |
| 151 | 2 | DALYs (Disability-Adjusted Life Years) | 48 | Hungary | 2 | Female | 24 | 15-49 years | 532 | Inflammatory bowel disease | 3 | Rate | 2021 | 47.05800979 | 64.31730677 | 32.9539585 | Number | 2021 | 1006.506234 | 1375.658905 | 704.8399373 | -0.30(-0.61-0.02) |
| 54 | 2 | DALYs (Disability-Adjusted Life Years) | 26 | Independent State of Papua New Guinea | 2 | Female | 24 | 15-49 years | 532 | Inflammatory bowel disease | 3 | Rate | 2021 | 1.874493918 | 2.64676926 | 1.26834287 | Number | 2021 | 49.04065466 | 69.24498179 | 33.18248412 | -0.39(-0.57--0.20) |
| 164 | 2 | DALYs (Disability-Adjusted Life Years) | 27 | Independent State of Samoa | 2 | Female | 24 | 15-49 years | 532 | Inflammatory bowel disease | 3 | Rate | 2021 | 2.362098984 | 3.399833831 | 1.608051774 | Number | 2021 | 1.149205722 | 1.654083304 | 0.782347527 | 0.46(0.34-0.57) |
| 174 | 2 | DALYs (Disability-Adjusted Life Years) | 84 | Ireland | 2 | Female | 24 | 15-49 years | 532 | Inflammatory bowel disease | 3 | Rate | 2021 | 39.48284885 | 54.64180684 | 26.78148259 | Number | 2021 | 460.6499701 | 637.5109046 | 312.4619806 | 0.82(0.57-1.07) |
| 79 | 2 | DALYs (Disability-Adjusted Life Years) | 160 | Islamic Republic of Afghanistan | 2 | Female | 24 | 15-49 years | 532 | Inflammatory bowel disease | 3 | Rate | 2021 | 11.2254225 | 30.63247456 | 4.73732195 | Number | 2021 | 807.7019597 | 2204.096079 | 340.8641609 | 0.70(0.59-0.81) |
| 117 | 2 | DALYs (Disability-Adjusted Life Years) | 142 | Islamic Republic of Iran | 2 | Female | 24 | 15-49 years | 532 | Inflammatory bowel disease | 3 | Rate | 2021 | 7.642128856 | 10.91819056 | 5.355052115 | Number | 2021 | 1776.446602 | 2537.981612 | 1244.805513 | 1.29(1.02-1.55) |
| 197 | 2 | DALYs (Disability-Adjusted Life Years) | 212 | Islamic Republic of Mauritania | 2 | Female | 24 | 15-49 years | 532 | Inflammatory bowel disease | 3 | Rate | 2021 | 41.61406899 | 70.02583265 | 22.82702214 | Number | 2021 | 446.7005097 | 751.6826855 | 245.0335349 | 0.70(0.45-0.95) |
| 65 | 2 | DALYs (Disability-Adjusted Life Years) | 165 | Islamic Republic of Pakistan | 2 | Female | 24 | 15-49 years | 532 | Inflammatory bowel disease | 3 | Rate | 2021 | 17.05794335 | 26.26427986 | 10.97002159 | Number | 2021 | 10332.72137 | 15909.39072 | 6645.008379 | -0.23(-0.35--0.12) |
| 156 | 2 | DALYs (Disability-Adjusted Life Years) | 115 | Jamaica | 2 | Female | 24 | 15-49 years | 532 | Inflammatory bowel disease | 3 | Rate | 2021 | 11.56434955 | 15.25007549 | 8.804197278 | Number | 2021 | 89.29072162 | 117.7489698 | 67.97901819 | 0.55(0.21-0.90) |
| 45 | 2 | DALYs (Disability-Adjusted Life Years) | 67 | Japan | 2 | Female | 24 | 15-49 years | 532 | Inflammatory bowel disease | 3 | Rate | 2021 | 6.421741343 | 9.000773686 | 4.368675475 | Number | 2021 | 1596.852072 | 2238.163037 | 1086.329721 | -0.66(-1.13--0.18) |
| 110 | 2 | DALYs (Disability-Adjusted Life Years) | 140 | Kingdom of Bahrain | 2 | Female | 24 | 15-49 years | 532 | Inflammatory bowel disease | 3 | Rate | 2021 | 9.526472383 | 13.66924749 | 5.864378708 | Number | 2021 | 31.05842623 | 44.56479772 | 19.11918348 | 0.49(0.34-0.64) |
| 10 | 2 | DALYs (Disability-Adjusted Life Years) | 76 | Kingdom of Belgium | 2 | Female | 24 | 15-49 years | 532 | Inflammatory bowel disease | 3 | Rate | 2021 | 30.25656759 | 41.1334128 | 21.05691698 | Number | 2021 | 749.6320987 | 1019.115155 | 521.7029598 | 0.04(-0.12-0.21) |
| 30 | 2 | DALYs (Disability-Adjusted Life Years) | 162 | Kingdom of Bhutan | 2 | Female | 24 | 15-49 years | 532 | Inflammatory bowel disease | 3 | Rate | 2021 | 16.43669867 | 23.58613007 | 11.03344015 | Number | 2021 | 34.0290687 | 48.83061111 | 22.84264624 | 0.08(0.02-0.14) |
| 144 | 2 | DALYs (Disability-Adjusted Life Years) | 10 | Kingdom of Cambodia | 2 | Female | 24 | 15-49 years | 532 | Inflammatory bowel disease | 3 | Rate | 2021 | 5.986372635 | 10.50462876 | 3.20167451 | Number | 2021 | 270.4959759 | 474.6546835 | 144.6685872 | -0.99(-1.07--0.91) |
| 16 | 2 | DALYs (Disability-Adjusted Life Years) | 78 | Kingdom of Denmark | 2 | Female | 24 | 15-49 years | 532 | Inflammatory bowel disease | 3 | Rate | 2021 | 39.56982052 | 55.01672197 | 26.09957915 | Number | 2021 | 499.7892376 | 694.892349 | 329.6524622 | -0.79(-1.21--0.36) |
| 89 | 2 | DALYs (Disability-Adjusted Life Years) | 197 | Kingdom of Eswatini | 2 | Female | 24 | 15-49 years | 532 | Inflammatory bowel disease | 3 | Rate | 2021 | 9.103444842 | 14.31499599 | 5.064508095 | Number | 2021 | 28.69155873 | 45.11693709 | 15.96193902 | 0.65(0.30-1.00) |
| 12 | 2 | DALYs (Disability-Adjusted Life Years) | 194 | Kingdom of Lesotho | 2 | Female | 24 | 15-49 years | 532 | Inflammatory bowel disease | 3 | Rate | 2021 | 8.83275973 | 13.5165636 | 5.709654075 | Number | 2021 | 44.77229922 | 68.51399204 | 28.94161604 | 1.82(1.38-2.27) |
| 78 | 2 | DALYs (Disability-Adjusted Life Years) | 148 | Kingdom of Morocco | 2 | Female | 24 | 15-49 years | 532 | Inflammatory bowel disease | 3 | Rate | 2021 | 9.971869304 | 15.61823658 | 6.176512411 | Number | 2021 | 965.8533621 | 1512.748097 | 598.2434282 | 0.75(0.63-0.87) |
| 22 | 2 | DALYs (Disability-Adjusted Life Years) | 90 | Kingdom of Norway | 2 | Female | 24 | 15-49 years | 532 | Inflammatory bowel disease | 3 | Rate | 2021 | 43.31797097 | 60.43925484 | 29.58478963 | Number | 2021 | 524.6303831 | 731.9887962 | 358.3057832 | -0.23(-0.39--0.07) |
| 111 | 2 | DALYs (Disability-Adjusted Life Years) | 152 | Kingdom of Saudi Arabia | 2 | Female | 24 | 15-49 years | 532 | Inflammatory bowel disease | 3 | Rate | 2021 | 9.764213039 | 14.14536466 | 6.487477136 | Number | 2021 | 990.6946057 | 1435.214124 | 658.2310912 | 0.82(0.60-1.05) |
| 101 | 2 | DALYs (Disability-Adjusted Life Years) | 92 | Kingdom of Spain | 2 | Female | 24 | 15-49 years | 532 | Inflammatory bowel disease | 3 | Rate | 2021 | 24.98675756 | 36.36132377 | 16.38038779 | Number | 2021 | 2474.489572 | 3600.936066 | 1622.183218 | -0.08(-0.82-0.66) |
| 66 | 2 | DALYs (Disability-Adjusted Life Years) | 93 | Kingdom of Sweden | 2 | Female | 24 | 15-49 years | 532 | Inflammatory bowel disease | 3 | Rate | 2021 | 39.5001042 | 55.51683418 | 25.64434847 | Number | 2021 | 867.800702 | 1219.681534 | 563.3955671 | -0.75(-0.98--0.53) |
| 195 | 2 | DALYs (Disability-Adjusted Life Years) | 18 | Kingdom of Thailand | 2 | Female | 24 | 15-49 years | 532 | Inflammatory bowel disease | 3 | Rate | 2021 | 2.370221771 | 3.189511596 | 1.666091449 | Number | 2021 | 386.3800986 | 519.9360751 | 271.5967704 | 0.80(0.67-0.93) |
| 185 | 2 | DALYs (Disability-Adjusted Life Years) | 89 | Kingdom of the Netherlands | 2 | Female | 24 | 15-49 years | 532 | Inflammatory bowel disease | 3 | Rate | 2021 | 67.64000718 | 90.44576822 | 48.5380178 | Number | 2021 | 2482.126476 | 3319.009642 | 1781.157397 | -0.10(-0.87-0.67) |
| 168 | 2 | DALYs (Disability-Adjusted Life Years) | 29 | Kingdom of Tonga | 2 | Female | 24 | 15-49 years | 532 | Inflammatory bowel disease | 3 | Rate | 2021 | 2.783577569 | 4.554253765 | 1.80182153 | Number | 2021 | 0.703790842 | 1.151482943 | 0.455566787 | 0.25(0.20-0.30) |
| 104 | 2 | DALYs (Disability-Adjusted Life Years) | 37 | Kyrgyz Republic | 2 | Female | 24 | 15-49 years | 532 | Inflammatory bowel disease | 3 | Rate | 2021 | 12.55501892 | 17.44342365 | 9.39922051 | Number | 2021 | 216.4629747 | 300.7446977 | 162.0533783 | -2.56(-3.19--1.92) |
| 49 | 2 | DALYs (Disability-Adjusted Life Years) | 12 | Lao People's Democratic Republic | 2 | Female | 24 | 15-49 years | 532 | Inflammatory bowel disease | 3 | Rate | 2021 | 3.359314269 | 5.161290588 | 1.957941171 | Number | 2021 | 66.66005184 | 102.4173002 | 38.8521137 | -0.33(-0.40--0.25) |
| 73 | 2 | DALYs (Disability-Adjusted Life Years) | 146 | Lebanese Republic | 2 | Female | 24 | 15-49 years | 532 | Inflammatory bowel disease | 3 | Rate | 2021 | 22.35531319 | 31.34666538 | 15.46385893 | Number | 2021 | 331.6631265 | 465.058707 | 229.4216037 | 0.12(0.04-0.20) |
| 192 | 2 | DALYs (Disability-Adjusted Life Years) | 13 | Malaysia | 2 | Female | 24 | 15-49 years | 532 | Inflammatory bowel disease | 3 | Rate | 2021 | 2.731146637 | 3.766380769 | 1.847008444 | Number | 2021 | 230.1457417 | 317.3818951 | 155.6420012 | 1.49(1.10-1.88) |
| 69 | 2 | DALYs (Disability-Adjusted Life Years) | 38 | Mongolia | 2 | Female | 24 | 15-49 years | 532 | Inflammatory bowel disease | 3 | Rate | 2021 | 14.38255255 | 20.64546837 | 9.763528431 | Number | 2021 | 121.3637183 | 174.2118305 | 82.38719169 | -0.84(-0.96--0.72) |
| 58 | 2 | DALYs (Disability-Adjusted Life Years) | 50 | Montenegro | 2 | Female | 24 | 15-49 years | 532 | Inflammatory bowel disease | 3 | Rate | 2021 | 21.18485761 | 29.132817 | 14.98032634 | Number | 2021 | 30.51119044 | 41.95812611 | 21.57520235 | 0.12(0.01-0.24) |
| 161 | 2 | DALYs (Disability-Adjusted Life Years) | 72 | New Zealand | 2 | Female | 24 | 15-49 years | 532 | Inflammatory bowel disease | 3 | Rate | 2021 | 35.09462872 | 49.52325943 | 22.76651594 | Number | 2021 | 419.2929768 | 591.6790011 | 272.0028845 | -0.09(-0.45-0.27) |
| 109 | 2 | DALYs (Disability-Adjusted Life Years) | 49 | North Macedonia | 2 | Female | 24 | 15-49 years | 532 | Inflammatory bowel disease | 3 | Rate | 2021 | 16.41593901 | 23.39894682 | 10.7261631 | Number | 2021 | 87.12260222 | 124.1827918 | 56.9258475 | 0.25(0.20-0.29) |
| 137 | 2 | DALYs (Disability-Adjusted Life Years) | 376 | Northern Mariana Islands | 2 | Female | 24 | 15-49 years | 532 | Inflammatory bowel disease | 3 | Rate | 2021 | 1.861568 | 2.656500793 | 1.209268564 | Number | 2021 | 0.213056164 | 0.304036096 | 0.138400596 | 0.02(-0.23-0.27) |
| 149 | 2 | DALYs (Disability-Adjusted Life Years) | 149 | Palestine | 2 | Female | 24 | 15-49 years | 532 | Inflammatory bowel disease | 3 | Rate | 2021 | 11.47654807 | 15.31544496 | 8.108453905 | Number | 2021 | 149.4361609 | 199.4224468 | 105.5801984 | -1.16(-1.47--0.85) |
| 157 | 2 | DALYs (Disability-Adjusted Life Years) | 139 | People's Democratic Republic of Algeria | 2 | Female | 24 | 15-49 years | 532 | Inflammatory bowel disease | 3 | Rate | 2021 | 10.72781529 | 15.9168713 | 6.681939701 | Number | 2021 | 1204.016784 | 1786.401021 | 749.9353159 | 1.00(0.88-1.12) |
| 148 | 2 | DALYs (Disability-Adjusted Life Years) | 161 | People's Republic of Bangladesh | 2 | Female | 24 | 15-49 years | 532 | Inflammatory bowel disease | 3 | Rate | 2021 | 16.1464426 | 22.17492559 | 11.3487157 | Number | 2021 | 7426.604458 | 10199.4232 | 5219.875652 | 0.48(0.36-0.60) |
| 114 | 2 | DALYs (Disability-Adjusted Life Years) | 6 | People's Republic of China | 2 | Female | 24 | 15-49 years | 532 | Inflammatory bowel disease | 3 | Rate | 2021 | 3.730076693 | 5.098327919 | 2.617218559 | Number | 2021 | 11887.65832 | 16248.23973 | 8341.008118 | -0.86(-1.22--0.49) |
| 3 | 2 | DALYs (Disability-Adjusted Life Years) | 121 | Plurinational State of Bolivia | 2 | Female | 24 | 15-49 years | 532 | Inflammatory bowel disease | 3 | Rate | 2021 | 5.382961017 | 8.122595554 | 3.553568062 | Number | 2021 | 167.8394743 | 253.2606429 | 110.7994268 | -0.97(-1.07--0.87) |
| 56 | 2 | DALYs (Disability-Adjusted Life Years) | 91 | Portuguese Republic | 2 | Female | 24 | 15-49 years | 532 | Inflammatory bowel disease | 3 | Rate | 2021 | 23.65386456 | 32.71446481 | 16.97085407 | Number | 2021 | 550.6335871 | 761.5534902 | 395.0611211 | 0.56(0.14-0.98) |
| 75 | 2 | DALYs (Disability-Adjusted Life Years) | 74 | Principality of Andorra | 2 | Female | 24 | 15-49 years | 532 | Inflammatory bowel disease | 3 | Rate | 2021 | 35.81657355 | 49.92892625 | 24.39532477 | Number | 2021 | 7.158788626 | 9.979475809 | 4.875982154 | 0.54(0.45-0.64) |
| 170 | 2 | DALYs (Disability-Adjusted Life Years) | 367 | Principality of Monaco | 2 | Female | 24 | 15-49 years | 532 | Inflammatory bowel disease | 3 | Rate | 2021 | 33.28003537 | 47.42272217 | 22.07856912 | Number | 2021 | 2.376361986 | 3.386220988 | 1.576520932 | 0.04(-0.03-0.11) |
| 184 | 2 | DALYs (Disability-Adjusted Life Years) | 385 | Puerto Rico | 2 | Female | 24 | 15-49 years | 532 | Inflammatory bowel disease | 3 | Rate | 2021 | 12.57316295 | 16.24555892 | 9.69124871 | Number | 2021 | 94.28062201 | 121.8183051 | 72.67041396 | -2.14(-2.39--1.88) |
| 44 | 2 | DALYs (Disability-Adjusted Life Years) | 43 | Republic of Albania | 2 | Female | 24 | 15-49 years | 532 | Inflammatory bowel disease | 3 | Rate | 2021 | 21.37987146 | 31.17904657 | 14.80698687 | Number | 2021 | 131.212193 | 191.3515282 | 90.87319459 | -0.53(-0.67--0.39) |
| 172 | 2 | DALYs (Disability-Adjusted Life Years) | 168 | Republic of Angola | 2 | Female | 24 | 15-49 years | 532 | Inflammatory bowel disease | 3 | Rate | 2021 | 7.354868036 | 11.44194103 | 4.110168869 | Number | 2021 | 564.4876292 | 878.1713193 | 315.4563031 | 0.23(0.08-0.39) |
| 24 | 2 | DALYs (Disability-Adjusted Life Years) | 33 | Republic of Armenia | 2 | Female | 24 | 15-49 years | 532 | Inflammatory bowel disease | 3 | Rate | 2021 | 14.2248862 | 19.90931835 | 10.2583722 | Number | 2021 | 104.8093737 | 146.6924345 | 75.58398362 | -0.10(-0.30-0.09) |
| 123 | 2 | DALYs (Disability-Adjusted Life Years) | 75 | Republic of Austria | 2 | Female | 24 | 15-49 years | 532 | Inflammatory bowel disease | 3 | Rate | 2021 | 29.74506478 | 41.93986694 | 19.94802716 | Number | 2021 | 587.3194403 | 828.1070947 | 393.8758996 | -0.16(-0.35-0.04) |
| 152 | 2 | DALYs (Disability-Adjusted Life Years) | 34 | Republic of Azerbaijan | 2 | Female | 24 | 15-49 years | 532 | Inflammatory bowel disease | 3 | Rate | 2021 | 11.01159063 | 15.70548876 | 7.329400789 | Number | 2021 | 301.8394337 | 430.5041834 | 200.9066862 | 0.33(0.26-0.39) |
| 47 | 2 | DALYs (Disability-Adjusted Life Years) | 57 | Republic of Belarus | 2 | Female | 24 | 15-49 years | 532 | Inflammatory bowel disease | 3 | Rate | 2021 | 14.78683164 | 19.95634497 | 10.31236276 | Number | 2021 | 313.5807658 | 423.209386 | 218.6917855 | 0.37(0.28-0.47) |
| 158 | 2 | DALYs (Disability-Adjusted Life Years) | 200 | Republic of Benin | 2 | Female | 24 | 15-49 years | 532 | Inflammatory bowel disease | 3 | Rate | 2021 | 52.55085705 | 94.27734088 | 23.72310023 | Number | 2021 | 1704.813881 | 3058.471895 | 769.6062984 | 0.62(0.47-0.77) |
| 201 | 2 | DALYs (Disability-Adjusted Life Years) | 193 | Republic of Botswana | 2 | Female | 24 | 15-49 years | 532 | Inflammatory bowel disease | 3 | Rate | 2021 | 7.433041609 | 11.50706231 | 4.490365402 | Number | 2021 | 50.57236906 | 78.29088447 | 30.55121016 | 0.31(-0.21-0.83) |
| 48 | 2 | DALYs (Disability-Adjusted Life Years) | 45 | Republic of Bulgaria | 2 | Female | 24 | 15-49 years | 532 | Inflammatory bowel disease | 3 | Rate | 2021 | 18.27368202 | 25.84569707 | 12.45015704 | Number | 2021 | 260.3017223 | 368.1622266 | 177.347801 | 0.63(0.51-0.75) |
| 162 | 2 | DALYs (Disability-Adjusted Life Years) | 175 | Republic of Burundi | 2 | Female | 24 | 15-49 years | 532 | Inflammatory bowel disease | 3 | Rate | 2021 | 6.97868803 | 10.58494675 | 4.197163636 | Number | 2021 | 218.2592578 | 331.0454074 | 131.2667677 | -0.70(-0.90--0.50) |
| 126 | 2 | DALYs (Disability-Adjusted Life Years) | 203 | Republic of Cabo Verde | 2 | Female | 24 | 15-49 years | 532 | Inflammatory bowel disease | 3 | Rate | 2021 | 31.46622952 | 51.39111837 | 17.66745427 | Number | 2021 | 47.29267565 | 77.23910775 | 26.55358449 | -2.01(-2.12--1.90) |
| 71 | 2 | DALYs (Disability-Adjusted Life Years) | 202 | Republic of Cameroon | 2 | Female | 24 | 15-49 years | 532 | Inflammatory bowel disease | 3 | Rate | 2021 | 49.84914533 | 85.75139452 | 23.54224604 | Number | 2021 | 3904.526456 | 6716.63649 | 1843.989939 | 0.31(0.21-0.41) |
| 74 | 2 | DALYs (Disability-Adjusted Life Years) | 204 | Republic of Chad | 2 | Female | 24 | 15-49 years | 532 | Inflammatory bowel disease | 3 | Rate | 2021 | 53.77223649 | 93.4260753 | 25.59542676 | Number | 2021 | 2079.899809 | 3613.702699 | 990.0262051 | 1.06(0.94-1.19) |
| 86 | 2 | DALYs (Disability-Adjusted Life Years) | 98 | Republic of Chile | 2 | Female | 24 | 15-49 years | 532 | Inflammatory bowel disease | 3 | Rate | 2021 | 13.1876687 | 18.15655164 | 9.507790416 | Number | 2021 | 621.1619909 | 855.2049661 | 447.8333629 | -0.22(-0.38--0.05) |
| 146 | 2 | DALYs (Disability-Adjusted Life Years) | 125 | Republic of Colombia | 2 | Female | 24 | 15-49 years | 532 | Inflammatory bowel disease | 3 | Rate | 2021 | 6.312262762 | 7.768969028 | 5.137670798 | Number | 2021 | 826.9305007 | 1017.764578 | 673.0544728 | 0.54(0.39-0.68) |
| 26 | 2 | DALYs (Disability-Adjusted Life Years) | 126 | Republic of Costa Rica | 2 | Female | 24 | 15-49 years | 532 | Inflammatory bowel disease | 3 | Rate | 2021 | 3.926888104 | 4.713202885 | 3.296113172 | Number | 2021 | 50.83482644 | 61.01392358 | 42.66924256 | 0.64(0.34-0.93) |
| 147 | 2 | DALYs (Disability-Adjusted Life Years) | 46 | Republic of Croatia | 2 | Female | 24 | 15-49 years | 532 | Inflammatory bowel disease | 3 | Rate | 2021 | 21.36339204 | 30.25062787 | 14.48983881 | Number | 2021 | 191.6398084 | 271.3625495 | 129.98076 | -0.19(-0.87-0.49) |
| 136 | 2 | DALYs (Disability-Adjusted Life Years) | 109 | Republic of Cuba | 2 | Female | 24 | 15-49 years | 532 | Inflammatory bowel disease | 3 | Rate | 2021 | 10.20523877 | 13.72034076 | 7.52807803 | Number | 2021 | 253.9963825 | 341.4831341 | 187.3650024 | -1.36(-1.52--1.19) |
| 175 | 2 | DALYs (Disability-Adjusted Life Years) | 77 | Republic of Cyprus | 2 | Female | 24 | 15-49 years | 532 | Inflammatory bowel disease | 3 | Rate | 2021 | 30.35571772 | 42.70788684 | 21.04299796 | Number | 2021 | 108.4066666 | 152.5188662 | 75.1489813 | -0.27(-0.36--0.18) |
| 173 | 2 | DALYs (Disability-Adjusted Life Years) | 205 | Republic of C么te d'Ivoire | 2 | Female | 24 | 15-49 years | 532 | Inflammatory bowel disease | 3 | Rate | 2021 | 54.62809521 | 94.89993237 | 24.39566193 | Number | 2021 | 3637.58506 | 6319.213123 | 1624.462559 | 1.83(1.65-2.01) |
| 68 | 2 | DALYs (Disability-Adjusted Life Years) | 177 | Republic of Djibouti | 2 | Female | 24 | 15-49 years | 532 | Inflammatory bowel disease | 3 | Rate | 2021 | 7.440145583 | 10.94033369 | 4.756432332 | Number | 2021 | 23.90467965 | 35.15054501 | 15.28209225 | -0.14(-0.31-0.02) |
| 83 | 2 | DALYs (Disability-Adjusted Life Years) | 122 | Republic of Ecuador | 2 | Female | 24 | 15-49 years | 532 | Inflammatory bowel disease | 3 | Rate | 2021 | 3.829974617 | 4.969043721 | 2.836355835 | Number | 2021 | 180.6048666 | 234.318388 | 133.7501468 | -1.50(-1.78--1.23) |
| 200 | 2 | DALYs (Disability-Adjusted Life Years) | 127 | Republic of El Salvador | 2 | Female | 24 | 15-49 years | 532 | Inflammatory bowel disease | 3 | Rate | 2021 | 3.96333397 | 5.439525963 | 2.720226038 | Number | 2021 | 70.40013406 | 96.62152116 | 48.31898579 | -0.23(-0.37--0.09) |
| 80 | 2 | DALYs (Disability-Adjusted Life Years) | 172 | Republic of Equatorial Guinea | 2 | Female | 24 | 15-49 years | 532 | Inflammatory bowel disease | 3 | Rate | 2021 | 8.340802878 | 13.65385438 | 4.391014437 | Number | 2021 | 30.39979874 | 49.76432499 | 16.00396954 | -0.69(-0.92--0.45) |
| 159 | 2 | DALYs (Disability-Adjusted Life Years) | 58 | Republic of Estonia | 2 | Female | 24 | 15-49 years | 532 | Inflammatory bowel disease | 3 | Rate | 2021 | 12.42471425 | 16.98742455 | 8.541477663 | Number | 2021 | 34.58609232 | 47.28709427 | 23.7765094 | -2.64(-3.66--1.60) |
| 145 | 2 | DALYs (Disability-Adjusted Life Years) | 22 | Republic of Fiji | 2 | Female | 24 | 15-49 years | 532 | Inflammatory bowel disease | 3 | Rate | 2021 | 2.586318708 | 3.800015729 | 1.781317715 | Number | 2021 | 5.906732271 | 8.678619331 | 4.068240622 | -0.18(-0.31--0.06) |
| 46 | 2 | DALYs (Disability-Adjusted Life Years) | 79 | Republic of Finland | 2 | Female | 24 | 15-49 years | 532 | Inflammatory bowel disease | 3 | Rate | 2021 | 34.05344991 | 48.79661969 | 23.03762933 | Number | 2021 | 387.0249567 | 554.5843276 | 261.8277301 | -1.62(-2.16--1.08) |
| 176 | 2 | DALYs (Disability-Adjusted Life Years) | 207 | Republic of Ghana | 2 | Female | 24 | 15-49 years | 532 | Inflammatory bowel disease | 3 | Rate | 2021 | 43.53838224 | 80.19714458 | 20.77327635 | Number | 2021 | 3975.19367 | 7322.256019 | 1896.666629 | -0.22(-0.31--0.13) |
| 107 | 2 | DALYs (Disability-Adjusted Life Years) | 128 | Republic of Guatemala | 2 | Female | 24 | 15-49 years | 532 | Inflammatory bowel disease | 3 | Rate | 2021 | 5.629068647 | 6.692958314 | 4.720062717 | Number | 2021 | 247.4187057 | 294.1806518 | 207.4644815 | -0.52(-1.08-0.05) |
| 134 | 2 | DALYs (Disability-Adjusted Life Years) | 208 | Republic of Guinea | 2 | Female | 24 | 15-49 years | 532 | Inflammatory bowel disease | 3 | Rate | 2021 | 52.68706905 | 85.48317932 | 27.07320349 | Number | 2021 | 1748.47159 | 2836.842383 | 898.4505688 | 1.01(0.90-1.13) |
| 57 | 2 | DALYs (Disability-Adjusted Life Years) | 209 | Republic of Guinea-Bissau | 2 | Female | 24 | 15-49 years | 532 | Inflammatory bowel disease | 3 | Rate | 2021 | 87.33389912 | 141.3448402 | 47.06414521 | Number | 2021 | 458.7746423 | 742.5000965 | 247.2331661 | 1.14(1.01-1.27) |
| 186 | 2 | DALYs (Disability-Adjusted Life Years) | 113 | Republic of Guyana | 2 | Female | 24 | 15-49 years | 532 | Inflammatory bowel disease | 3 | Rate | 2021 | 27.97151955 | 36.44909125 | 20.60813048 | Number | 2021 | 56.83652017 | 74.06245864 | 41.87453676 | -0.11(-0.47-0.26) |
| 23 | 2 | DALYs (Disability-Adjusted Life Years) | 114 | Republic of Haiti | 2 | Female | 24 | 15-49 years | 532 | Inflammatory bowel disease | 3 | Rate | 2021 | 25.58684137 | 46.10547483 | 12.96150577 | Number | 2021 | 905.7717016 | 1632.129335 | 458.8360464 | -0.14(-0.26--0.01) |
| 70 | 2 | DALYs (Disability-Adjusted Life Years) | 129 | Republic of Honduras | 2 | Female | 24 | 15-49 years | 532 | Inflammatory bowel disease | 3 | Rate | 2021 | 8.564777851 | 15.19046938 | 4.171278401 | Number | 2021 | 243.1100171 | 431.1793412 | 118.4011519 | -1.15(-1.27--1.03) |
| 27 | 2 | DALYs (Disability-Adjusted Life Years) | 83 | Republic of Iceland | 2 | Female | 24 | 15-49 years | 532 | Inflammatory bowel disease | 3 | Rate | 2021 | 44.52635906 | 61.26121363 | 31.08140269 | Number | 2021 | 35.45768434 | 48.78415439 | 24.75105956 | -0.81(-0.99--0.62) |
| 154 | 2 | DALYs (Disability-Adjusted Life Years) | 163 | Republic of India | 2 | Female | 24 | 15-49 years | 532 | Inflammatory bowel disease | 3 | Rate | 2021 | 12.72325409 | 17.71431359 | 9.045631988 | Number | 2021 | 48130.70083 | 67011.34175 | 34218.65224 | -0.46(-0.65--0.28) |
| 21 | 2 | DALYs (Disability-Adjusted Life Years) | 11 | Republic of Indonesia | 2 | Female | 24 | 15-49 years | 532 | Inflammatory bowel disease | 3 | Rate | 2021 | 3.853941322 | 5.202221008 | 2.501715295 | Number | 2021 | 2901.769995 | 3916.9379 | 1883.630749 | -1.74(-1.87--1.60) |
| 36 | 2 | DALYs (Disability-Adjusted Life Years) | 143 | Republic of Iraq | 2 | Female | 24 | 15-49 years | 532 | Inflammatory bowel disease | 3 | Rate | 2021 | 11.30401475 | 16.10210047 | 8.069912904 | Number | 2021 | 1191.727442 | 1697.566345 | 850.7717722 | -0.47(-0.58--0.36) |
| 142 | 2 | DALYs (Disability-Adjusted Life Years) | 86 | Republic of Italy | 2 | Female | 24 | 15-49 years | 532 | Inflammatory bowel disease | 3 | Rate | 2021 | 21.25967465 | 28.52172158 | 15.64130996 | Number | 2021 | 2579.507696 | 3460.63623 | 1897.812648 | 0.25(-0.02-0.52) |
| 59 | 2 | DALYs (Disability-Adjusted Life Years) | 36 | Republic of Kazakhstan | 2 | Female | 24 | 15-49 years | 532 | Inflammatory bowel disease | 3 | Rate | 2021 | 24.26707041 | 30.75922885 | 19.16857873 | Number | 2021 | 1149.233811 | 1456.687815 | 907.7807252 | -0.05(-0.30-0.20) |
| 181 | 2 | DALYs (Disability-Adjusted Life Years) | 180 | Republic of Kenya | 2 | Female | 24 | 15-49 years | 532 | Inflammatory bowel disease | 3 | Rate | 2021 | 7.420209496 | 11.00090466 | 4.517141111 | Number | 2021 | 984.8578121 | 1460.110648 | 599.54395 | 0.46(0.37-0.56) |
| 94 | 2 | DALYs (Disability-Adjusted Life Years) | 23 | Republic of Kiribati | 2 | Female | 24 | 15-49 years | 532 | Inflammatory bowel disease | 3 | Rate | 2021 | 2.572896146 | 3.734254404 | 1.680055662 | Number | 2021 | 0.822586491 | 1.193886986 | 0.537134425 | 0.27(0.16-0.38) |
| 100 | 2 | DALYs (Disability-Adjusted Life Years) | 68 | Republic of Korea | 2 | Female | 24 | 15-49 years | 532 | Inflammatory bowel disease | 3 | Rate | 2021 | 13.10060811 | 17.90252502 | 8.275629921 | Number | 2021 | 1518.720611 | 2075.394784 | 959.3730017 | -0.14(-0.76-0.48) |
| 32 | 2 | DALYs (Disability-Adjusted Life Years) | 59 | Republic of Latvia | 2 | Female | 24 | 15-49 years | 532 | Inflammatory bowel disease | 3 | Rate | 2021 | 13.79703074 | 18.86707014 | 9.736327366 | Number | 2021 | 53.7645979 | 73.52164819 | 37.94075232 | -2.58(-3.71--1.43) |
| 112 | 2 | DALYs (Disability-Adjusted Life Years) | 210 | Republic of Liberia | 2 | Female | 24 | 15-49 years | 532 | Inflammatory bowel disease | 3 | Rate | 2021 | 48.26567054 | 89.08577364 | 24.35482641 | Number | 2021 | 673.4664567 | 1243.042511 | 339.8307422 | 1.18(1.01-1.34) |
| 165 | 2 | DALYs (Disability-Adjusted Life Years) | 60 | Republic of Lithuania | 2 | Female | 24 | 15-49 years | 532 | Inflammatory bowel disease | 3 | Rate | 2021 | 14.07863718 | 20.09248876 | 9.401011741 | Number | 2021 | 80.6603271 | 115.1153123 | 53.86094353 | -0.94(-1.70--0.17) |
| 13 | 2 | DALYs (Disability-Adjusted Life Years) | 181 | Republic of Madagascar | 2 | Female | 24 | 15-49 years | 532 | Inflammatory bowel disease | 3 | Rate | 2021 | 9.338375756 | 15.42566697 | 5.759363915 | Number | 2021 | 676.4160234 | 1117.342949 | 417.173836 | 0.16(0.04-0.28) |
| 183 | 2 | DALYs (Disability-Adjusted Life Years) | 182 | Republic of Malawi | 2 | Female | 24 | 15-49 years | 532 | Inflammatory bowel disease | 3 | Rate | 2021 | 7.720280852 | 11.53390773 | 4.674241273 | Number | 2021 | 386.7299455 | 577.7649275 | 234.1455068 | 0.00(-0.11-0.11) |
| 52 | 2 | DALYs (Disability-Adjusted Life Years) | 14 | Republic of Maldives | 2 | Female | 24 | 15-49 years | 532 | Inflammatory bowel disease | 3 | Rate | 2021 | 2.687574875 | 3.857767443 | 1.891858791 | Number | 2021 | 3.095871783 | 4.443840238 | 2.179270353 | -0.40(-0.56--0.24) |
| 97 | 2 | DALYs (Disability-Adjusted Life Years) | 211 | Republic of Mali | 2 | Female | 24 | 15-49 years | 532 | Inflammatory bowel disease | 3 | Rate | 2021 | 79.7770188 | 124.4948384 | 43.17790673 | Number | 2021 | 4343.329888 | 6777.918763 | 2350.750825 | 0.64(0.55-0.73) |
| 15 | 2 | DALYs (Disability-Adjusted Life Years) | 88 | Republic of Malta | 2 | Female | 24 | 15-49 years | 532 | Inflammatory bowel disease | 3 | Rate | 2021 | 26.00807591 | 35.77139056 | 18.18574756 | Number | 2021 | 24.51865577 | 33.72284881 | 17.14429341 | 0.46(0.37-0.55) |
| 132 | 2 | DALYs (Disability-Adjusted Life Years) | 183 | Republic of Mauritius | 2 | Female | 24 | 15-49 years | 532 | Inflammatory bowel disease | 3 | Rate | 2021 | 7.366632727 | 8.460401314 | 6.40601775 | Number | 2021 | 23.31529041 | 26.77705282 | 20.27495733 | 2.34(0.89-3.81) |
| 189 | 2 | DALYs (Disability-Adjusted Life Years) | 61 | Republic of Moldova | 2 | Female | 24 | 15-49 years | 532 | Inflammatory bowel disease | 3 | Rate | 2021 | 10.69376275 | 15.13292516 | 7.209251212 | Number | 2021 | 94.32829782 | 133.4855751 | 63.5918723 | -1.72(-2.64--0.79) |
| 84 | 2 | DALYs (Disability-Adjusted Life Years) | 184 | Republic of Mozambique | 2 | Female | 24 | 15-49 years | 532 | Inflammatory bowel disease | 3 | Rate | 2021 | 6.935475139 | 11.27256084 | 4.279856988 | Number | 2021 | 526.561095 | 855.8450372 | 324.9389749 | 0.41(0.36-0.46) |
| 203 | 2 | DALYs (Disability-Adjusted Life Years) | 195 | Republic of Namibia | 2 | Female | 24 | 15-49 years | 532 | Inflammatory bowel disease | 3 | Rate | 2021 | 8.264214252 | 14.00316308 | 4.569948812 | Number | 2021 | 54.65234569 | 92.60477596 | 30.22167803 | -0.72(-0.85--0.60) |
| 95 | 2 | DALYs (Disability-Adjusted Life Years) | 369 | Republic of Nauru | 2 | Female | 24 | 15-49 years | 532 | Inflammatory bowel disease | 3 | Rate | 2021 | 2.540066787 | 3.888524832 | 1.617262269 | Number | 2021 | 0.072326624 | 0.110723023 | 0.046050411 | -0.41(-0.56--0.26) |
| 40 | 2 | DALYs (Disability-Adjusted Life Years) | 131 | Republic of Nicaragua | 2 | Female | 24 | 15-49 years | 532 | Inflammatory bowel disease | 3 | Rate | 2021 | 2.896180403 | 3.895079608 | 1.957052313 | Number | 2021 | 52.50455914 | 70.61350095 | 35.47920177 | 0.04(-0.12-0.19) |
| 82 | 2 | DALYs (Disability-Adjusted Life Years) | 374 | Republic of Niue | 2 | Female | 24 | 15-49 years | 532 | Inflammatory bowel disease | 3 | Rate | 2021 | 3.041523686 | 4.634671074 | 1.950287962 | Number | 2021 | 0.011671749 | 0.017785401 | 0.007484167 | -0.09(-0.18-0.00) |
| 143 | 2 | DALYs (Disability-Adjusted Life Years) | 380 | Republic of Palau | 2 | Female | 24 | 15-49 years | 532 | Inflammatory bowel disease | 3 | Rate | 2021 | 3.063698301 | 4.375567815 | 1.99943718 | Number | 2021 | 0.114748849 | 0.163884077 | 0.074887633 | 0.33(0.26-0.40) |
| 204 | 2 | DALYs (Disability-Adjusted Life Years) | 132 | Republic of Panama | 2 | Female | 24 | 15-49 years | 532 | Inflammatory bowel disease | 3 | Rate | 2021 | 11.63963962 | 14.08129714 | 9.35806022 | Number | 2021 | 124.4144774 | 150.5130126 | 100.0269948 | 0.92(0.64-1.20) |
| 90 | 2 | DALYs (Disability-Adjusted Life Years) | 136 | Republic of Paraguay | 2 | Female | 24 | 15-49 years | 532 | Inflammatory bowel disease | 3 | Rate | 2021 | 5.64288511 | 7.712908061 | 4.077336319 | Number | 2021 | 107.0464668 | 146.3151457 | 77.3477465 | 0.21(0.06-0.36) |
| 128 | 2 | DALYs (Disability-Adjusted Life Years) | 123 | Republic of Peru | 2 | Female | 24 | 15-49 years | 532 | Inflammatory bowel disease | 3 | Rate | 2021 | 4.864033833 | 6.794543526 | 3.448575791 | Number | 2021 | 467.8639464 | 653.5567098 | 331.7132105 | -1.79(-2.24--1.34) |
| 119 | 2 | DALYs (Disability-Adjusted Life Years) | 51 | Republic of Poland | 2 | Female | 24 | 15-49 years | 532 | Inflammatory bowel disease | 3 | Rate | 2021 | 12.07056524 | 15.15505757 | 9.625369461 | Number | 2021 | 1065.596992 | 1337.89789 | 849.7335911 | -0.01(-0.22-0.20) |
| 108 | 2 | DALYs (Disability-Adjusted Life Years) | 185 | Republic of Rwanda | 2 | Female | 24 | 15-49 years | 532 | Inflammatory bowel disease | 3 | Rate | 2021 | 7.996181143 | 13.12062305 | 4.655072995 | Number | 2021 | 281.5895514 | 462.0493575 | 163.9307431 | -0.52(-0.80--0.25) |
| 187 | 2 | DALYs (Disability-Adjusted Life Years) | 396 | Republic of San Marino | 2 | Female | 24 | 15-49 years | 532 | Inflammatory bowel disease | 3 | Rate | 2021 | 41.28949114 | 61.45795901 | 26.06317152 | Number | 2021 | 2.940594181 | 4.376971274 | 1.856191694 | 0.64(0.45-0.83) |
| 87 | 2 | DALYs (Disability-Adjusted Life Years) | 216 | Republic of Senegal | 2 | Female | 24 | 15-49 years | 532 | Inflammatory bowel disease | 3 | Rate | 2021 | 55.06061555 | 87.59896905 | 30.38774599 | Number | 2021 | 2147.912805 | 3417.232907 | 1185.424973 | 0.32(0.13-0.51) |
| 171 | 2 | DALYs (Disability-Adjusted Life Years) | 53 | Republic of Serbia | 2 | Female | 24 | 15-49 years | 532 | Inflammatory bowel disease | 3 | Rate | 2021 | 23.52535871 | 32.30170396 | 16.41425057 | Number | 2021 | 478.2095771 | 656.6099323 | 333.6591768 | -0.20(-0.27--0.13) |
| 31 | 2 | DALYs (Disability-Adjusted Life Years) | 186 | Republic of Seychelles | 2 | Female | 24 | 15-49 years | 532 | Inflammatory bowel disease | 3 | Rate | 2021 | 3.211866745 | 4.506814127 | 2.185271419 | Number | 2021 | 0.778579842 | 1.092484499 | 0.529725674 | -0.15(-0.27--0.03) |
| 202 | 2 | DALYs (Disability-Adjusted Life Years) | 217 | Republic of Sierra Leone | 2 | Female | 24 | 15-49 years | 532 | Inflammatory bowel disease | 3 | Rate | 2021 | 52.6013181 | 84.74800203 | 27.00800384 | Number | 2021 | 1196.266137 | 1927.350277 | 614.2195974 | 1.96(1.84-2.08) |
| 53 | 2 | DALYs (Disability-Adjusted Life Years) | 69 | Republic of Singapore | 2 | Female | 24 | 15-49 years | 532 | Inflammatory bowel disease | 3 | Rate | 2021 | 2.921922639 | 4.221821162 | 1.866796545 | Number | 2021 | 42.50411161 | 61.41324738 | 27.15558846 | -0.85(-1.01--0.68) |
| 43 | 2 | DALYs (Disability-Adjusted Life Years) | 55 | Republic of Slovenia | 2 | Female | 24 | 15-49 years | 532 | Inflammatory bowel disease | 3 | Rate | 2021 | 27.08609678 | 38.47558765 | 18.05464373 | Number | 2021 | 113.9280317 | 161.8338738 | 75.94043689 | -0.15(-0.46-0.15) |
| 140 | 2 | DALYs (Disability-Adjusted Life Years) | 196 | Republic of South Africa | 2 | Female | 24 | 15-49 years | 532 | Inflammatory bowel disease | 3 | Rate | 2021 | 7.80709553 | 10.744108 | 5.270489886 | Number | 2021 | 1209.141183 | 1664.017485 | 816.2787752 | -0.17(-1.00-0.67) |
| 37 | 2 | DALYs (Disability-Adjusted Life Years) | 435 | Republic of South Sudan | 2 | Female | 24 | 15-49 years | 532 | Inflammatory bowel disease | 3 | Rate | 2021 | 7.489809624 | 12.12358058 | 4.303504848 | Number | 2021 | 173.8873042 | 281.4673336 | 99.91240017 | 0.02(-0.21-0.24) |
| 19 | 2 | DALYs (Disability-Adjusted Life Years) | 522 | Republic of Sudan | 2 | Female | 24 | 15-49 years | 532 | Inflammatory bowel disease | 3 | Rate | 2021 | 9.491127261 | 14.6626621 | 6.033648627 | Number | 2021 | 1071.448451 | 1655.260346 | 681.1354748 | 1.19(1.06-1.32) |
| 115 | 2 | DALYs (Disability-Adjusted Life Years) | 118 | Republic of Suriname | 2 | Female | 24 | 15-49 years | 532 | Inflammatory bowel disease | 3 | Rate | 2021 | 20.64614792 | 29.92333407 | 14.39694647 | Number | 2021 | 29.96284655 | 43.42641886 | 20.89365531 | -0.67(-0.89--0.46) |
| 198 | 2 | DALYs (Disability-Adjusted Life Years) | 39 | Republic of Tajikistan | 2 | Female | 24 | 15-49 years | 532 | Inflammatory bowel disease | 3 | Rate | 2021 | 14.75883375 | 21.91601199 | 9.607606416 | Number | 2021 | 375.080431 | 556.9726825 | 244.1673385 | -0.19(-0.43-0.06) |
| 77 | 2 | DALYs (Disability-Adjusted Life Years) | 170 | Republic of the Congo | 2 | Female | 24 | 15-49 years | 532 | Inflammatory bowel disease | 3 | Rate | 2021 | 8.968265214 | 15.14840379 | 5.430392465 | Number | 2021 | 128.4947597 | 217.0420318 | 77.80512263 | 0.95(0.79-1.12) |
| 92 | 2 | DALYs (Disability-Adjusted Life Years) | 206 | Republic of the Gambia | 2 | Female | 24 | 15-49 years | 532 | Inflammatory bowel disease | 3 | Rate | 2021 | 76.75127964 | 131.3624229 | 39.06150178 | Number | 2021 | 472.0037362 | 807.850432 | 240.2197705 | 1.25(0.96-1.54) |
| 50 | 2 | DALYs (Disability-Adjusted Life Years) | 24 | Republic of the Marshall Islands | 2 | Female | 24 | 15-49 years | 532 | Inflammatory bowel disease | 3 | Rate | 2021 | 2.455237781 | 3.829839984 | 1.624117093 | Number | 2021 | 0.364148317 | 0.56802229 | 0.240880745 | 0.24(0.13-0.36) |
| 103 | 2 | DALYs (Disability-Adjusted Life Years) | 213 | Republic of the Niger | 2 | Female | 24 | 15-49 years | 532 | Inflammatory bowel disease | 3 | Rate | 2021 | 47.76244653 | 96.14030633 | 21.39423108 | Number | 2021 | 2546.260172 | 5125.328594 | 1140.546234 | 0.32(0.14-0.51) |
| 2 | 2 | DALYs (Disability-Adjusted Life Years) | 16 | Republic of the Philippines | 2 | Female | 24 | 15-49 years | 532 | Inflammatory bowel disease | 3 | Rate | 2021 | 2.604737667 | 3.703508616 | 1.896168744 | Number | 2021 | 763.525507 | 1085.60771 | 555.8230373 | -1.03(-1.24--0.82) |
| 155 | 2 | DALYs (Disability-Adjusted Life Years) | 15 | Republic of the Union of Myanmar | 2 | Female | 24 | 15-49 years | 532 | Inflammatory bowel disease | 3 | Rate | 2021 | 3.424064498 | 5.100433306 | 2.195991704 | Number | 2021 | 517.6471024 | 771.0790855 | 331.988122 | -1.69(-1.85--1.54) |
| 39 | 2 | DALYs (Disability-Adjusted Life Years) | 119 | Republic of Trinidad and Tobago | 2 | Female | 24 | 15-49 years | 532 | Inflammatory bowel disease | 3 | Rate | 2021 | 17.46025548 | 22.62072518 | 13.40286923 | Number | 2021 | 59.34138318 | 76.8800389 | 45.55172744 | -0.11(-0.38-0.15) |
| 122 | 2 | DALYs (Disability-Adjusted Life Years) | 154 | Republic of Tunisia | 2 | Female | 24 | 15-49 years | 532 | Inflammatory bowel disease | 3 | Rate | 2021 | 9.666606849 | 14.09761376 | 6.256066452 | Number | 2021 | 296.5860382 | 432.535995 | 191.9455288 | 1.19(1.11-1.26) |
| 1 | 2 | DALYs (Disability-Adjusted Life Years) | 155 | Republic of Turkey | 2 | Female | 24 | 15-49 years | 532 | Inflammatory bowel disease | 3 | Rate | 2021 | 12.01141038 | 16.3599372 | 8.52328542 | Number | 2021 | 2600.657934 | 3542.181905 | 1845.424405 | -0.71(-0.82--0.60) |
| 76 | 2 | DALYs (Disability-Adjusted Life Years) | 190 | Republic of Uganda | 2 | Female | 24 | 15-49 years | 532 | Inflammatory bowel disease | 3 | Rate | 2021 | 5.108398952 | 7.397901901 | 3.430805755 | Number | 2021 | 531.9732894 | 770.3952345 | 357.2737838 | 0.24(0.03-0.45) |
| 199 | 2 | DALYs (Disability-Adjusted Life Years) | 41 | Republic of Uzbekistan | 2 | Female | 24 | 15-49 years | 532 | Inflammatory bowel disease | 3 | Rate | 2021 | 14.80586219 | 19.32550896 | 11.15243772 | Number | 2021 | 1317.521456 | 1719.708882 | 992.416098 | 0.36(0.05-0.67) |
| 124 | 2 | DALYs (Disability-Adjusted Life Years) | 30 | Republic of Vanuatu | 2 | Female | 24 | 15-49 years | 532 | Inflammatory bowel disease | 3 | Rate | 2021 | 2.916680647 | 4.925802046 | 1.710755958 | Number | 2021 | 2.287157341 | 3.862638963 | 1.341514043 | 0.25(0.15-0.36) |
| 7 | 2 | DALYs (Disability-Adjusted Life Years) | 157 | Republic of Yemen | 2 | Female | 24 | 15-49 years | 532 | Inflammatory bowel disease | 3 | Rate | 2021 | 7.592799181 | 10.7910829 | 5.068614465 | Number | 2021 | 634.4280696 | 901.6656088 | 423.5159147 | 1.27(1.08-1.47) |
| 135 | 2 | DALYs (Disability-Adjusted Life Years) | 191 | Republic of Zambia | 2 | Female | 24 | 15-49 years | 532 | Inflammatory bowel disease | 3 | Rate | 2021 | 8.265882259 | 12.75483755 | 5.009828309 | Number | 2021 | 406.588091 | 627.394014 | 246.4269953 | 0.07(0.00-0.13) |
| 106 | 2 | DALYs (Disability-Adjusted Life Years) | 198 | Republic of Zimbabwe | 2 | Female | 24 | 15-49 years | 532 | Inflammatory bowel disease | 3 | Rate | 2021 | 8.200106673 | 13.61559615 | 4.115228748 | Number | 2021 | 332.976298 | 552.8794909 | 167.1043669 | 1.87(1.41-2.32) |
| 4 | 2 | DALYs (Disability-Adjusted Life Years) | 52 | Romania | 2 | Female | 24 | 15-49 years | 532 | Inflammatory bowel disease | 3 | Rate | 2021 | 6.406215287 | 8.524100589 | 4.82105889 | Number | 2021 | 260.1301923 | 346.1288493 | 195.7634766 | 0.62(-0.04-1.28) |
| 55 | 2 | DALYs (Disability-Adjusted Life Years) | 62 | Russian Federation | 2 | Female | 24 | 15-49 years | 532 | Inflammatory bowel disease | 3 | Rate | 2021 | 17.75363938 | 21.45732442 | 14.80904776 | Number | 2021 | 6017.372173 | 7272.68951 | 5019.339978 | -0.82(-1.29--0.35) |
| 20 | 2 | DALYs (Disability-Adjusted Life Years) | 393 | Saint Kitts and Nevis | 2 | Female | 24 | 15-49 years | 532 | Inflammatory bowel disease | 3 | Rate | 2021 | 10.49866779 | 14.1355533 | 7.751907732 | Number | 2021 | 1.63918518 | 2.207021876 | 1.210326159 | -2.04(-2.42--1.65) |
| 105 | 2 | DALYs (Disability-Adjusted Life Years) | 116 | Saint Lucia | 2 | Female | 24 | 15-49 years | 532 | Inflammatory bowel disease | 3 | Rate | 2021 | 19.82132669 | 24.63577665 | 15.70296912 | Number | 2021 | 9.053681609 | 11.25275222 | 7.1725614 | -0.84(-1.19--0.49) |
| 63 | 2 | DALYs (Disability-Adjusted Life Years) | 117 | Saint Vincent and the Grenadines | 2 | Female | 24 | 15-49 years | 532 | Inflammatory bowel disease | 3 | Rate | 2021 | 25.71858259 | 30.55314181 | 21.07825721 | Number | 2021 | 7.148436335 | 8.492193858 | 5.85866578 | -0.75(-1.15--0.34) |
| 11 | 2 | DALYs (Disability-Adjusted Life Years) | 54 | Slovak Republic | 2 | Female | 24 | 15-49 years | 532 | Inflammatory bowel disease | 3 | Rate | 2021 | 24.94992048 | 33.91888762 | 17.8215713 | Number | 2021 | 314.9238651 | 428.132314 | 224.9481364 | 0.41(0.35-0.48) |
| 98 | 2 | DALYs (Disability-Adjusted Life Years) | 20 | Socialist Republic of Viet Nam | 2 | Female | 24 | 15-49 years | 532 | Inflammatory bowel disease | 3 | Rate | 2021 | 2.212026806 | 3.197145731 | 1.45833276 | Number | 2021 | 564.9874477 | 816.602765 | 372.4817897 | -0.27(-0.42--0.13) |
| 5 | 2 | DALYs (Disability-Adjusted Life Years) | 28 | Solomon Islands | 2 | Female | 24 | 15-49 years | 532 | Inflammatory bowel disease | 3 | Rate | 2021 | 1.723679116 | 2.374641798 | 1.176659965 | Number | 2021 | 2.955169951 | 4.071216052 | 2.017330337 | 0.77(0.73-0.81) |
| 125 | 2 | DALYs (Disability-Adjusted Life Years) | 178 | State of Eritrea | 2 | Female | 24 | 15-49 years | 532 | Inflammatory bowel disease | 3 | Rate | 2021 | 9.604680323 | 14.33421138 | 6.250798601 | Number | 2021 | 158.9790436 | 237.263411 | 103.464764 | 0.14(0.02-0.25) |
| 193 | 2 | DALYs (Disability-Adjusted Life Years) | 85 | State of Israel | 2 | Female | 24 | 15-49 years | 532 | Inflammatory bowel disease | 3 | Rate | 2021 | 27.37782453 | 39.98937812 | 17.25406997 | Number | 2021 | 609.0045568 | 889.5415878 | 383.8072389 | -0.71(-1.44-0.01) |
| 91 | 2 | DALYs (Disability-Adjusted Life Years) | 145 | State of Kuwait | 2 | Female | 24 | 15-49 years | 532 | Inflammatory bowel disease | 3 | Rate | 2021 | 12.54904625 | 18.24237913 | 8.460759012 | Number | 2021 | 183.4358945 | 266.6582836 | 123.6752871 | 0.09(-0.68-0.86) |
| 130 | 2 | DALYs (Disability-Adjusted Life Years) | 147 | State of Libya | 2 | Female | 24 | 15-49 years | 532 | Inflammatory bowel disease | 3 | Rate | 2021 | 11.30817891 | 18.45006614 | 7.027042851 | Number | 2021 | 224.9378808 | 367.001514 | 139.7791935 | 2.67(2.42-2.93) |
| 160 | 2 | DALYs (Disability-Adjusted Life Years) | 151 | State of Qatar | 2 | Female | 24 | 15-49 years | 532 | Inflammatory bowel disease | 3 | Rate | 2021 | 14.38092371 | 20.44638834 | 9.331710393 | Number | 2021 | 79.78228113 | 113.4321783 | 51.77032833 | -0.64(-0.85--0.42) |
| 96 | 2 | DALYs (Disability-Adjusted Life Years) | 150 | Sultanate of Oman | 2 | Female | 24 | 15-49 years | 532 | Inflammatory bowel disease | 3 | Rate | 2021 | 10.15666384 | 14.9416563 | 6.461332475 | Number | 2021 | 103.1398741 | 151.7309791 | 65.61416507 | 0.96(0.73-1.20) |
| 167 | 2 | DALYs (Disability-Adjusted Life Years) | 94 | Swiss Confederation | 2 | Female | 24 | 15-49 years | 532 | Inflammatory bowel disease | 3 | Rate | 2021 | 35.57059678 | 53.55347449 | 22.63515177 | Number | 2021 | 695.9601166 | 1047.805933 | 442.8703561 | -0.30(-0.45--0.15) |
| 64 | 2 | DALYs (Disability-Adjusted Life Years) | 153 | Syrian Arab Republic | 2 | Female | 24 | 15-49 years | 532 | Inflammatory bowel disease | 3 | Rate | 2021 | 12.51002971 | 17.71260677 | 8.101683133 | Number | 2021 | 486.6969822 | 689.1008627 | 315.1922757 | 0.14(0.00-0.28) |
| 188 | 2 | DALYs (Disability-Adjusted Life Years) | 8 | Taiwan (Province of China) | 2 | Female | 24 | 15-49 years | 532 | Inflammatory bowel disease | 3 | Rate | 2021 | 3.682675883 | 4.482807675 | 2.990163377 | Number | 2021 | 206.8796898 | 251.8282603 | 167.9767896 | -1.71(-2.50--0.90) |
| 93 | 2 | DALYs (Disability-Adjusted Life Years) | 218 | Togolese Republic | 2 | Female | 24 | 15-49 years | 532 | Inflammatory bowel disease | 3 | Rate | 2021 | 77.86452381 | 131.6311438 | 37.64233605 | Number | 2021 | 1679.003856 | 2838.381169 | 811.6870727 | 0.85(0.75-0.95) |
| 141 | 2 | DALYs (Disability-Adjusted Life Years) | 413 | Tokelau | 2 | Female | 24 | 15-49 years | 532 | Inflammatory bowel disease | 3 | Rate | 2021 | 2.83142985 | 3.94770352 | 1.934548802 | Number | 2021 | 0.009104894 | 0.012694441 | 0.006220836 | -0.29(-0.43--0.14) |
| 6 | 2 | DALYs (Disability-Adjusted Life Years) | 40 | Turkmenistan | 2 | Female | 24 | 15-49 years | 532 | Inflammatory bowel disease | 3 | Rate | 2021 | 17.65300589 | 24.87261651 | 11.960644 | Number | 2021 | 221.8288802 | 312.5510013 | 150.2982711 | 0.05(-0.06-0.15) |
| 60 | 2 | DALYs (Disability-Adjusted Life Years) | 416 | Tuvalu | 2 | Female | 24 | 15-49 years | 532 | Inflammatory bowel disease | 3 | Rate | 2021 | 2.510402189 | 3.634665033 | 1.714457271 | Number | 2021 | 0.072907947 | 0.105559167 | 0.049791846 | -1.25(-1.42--1.09) |
| 191 | 2 | DALYs (Disability-Adjusted Life Years) | 63 | Ukraine | 2 | Female | 24 | 15-49 years | 532 | Inflammatory bowel disease | 3 | Rate | 2021 | 15.79726181 | 21.31771315 | 10.54050712 | Number | 2021 | 1596.353517 | 2154.209178 | 1065.145075 | 0.17(-0.03-0.37) |
| 120 | 2 | DALYs (Disability-Adjusted Life Years) | 176 | Union of the Comoros | 2 | Female | 24 | 15-49 years | 532 | Inflammatory bowel disease | 3 | Rate | 2021 | 9.615332054 | 13.56341295 | 6.633571756 | Number | 2021 | 18.77130616 | 26.47885436 | 12.95023465 | -0.46(-0.88--0.03) |
| 182 | 2 | DALYs (Disability-Adjusted Life Years) | 156 | United Arab Emirates | 2 | Female | 24 | 15-49 years | 532 | Inflammatory bowel disease | 3 | Rate | 2021 | 13.02076229 | 20.09622813 | 7.962086141 | Number | 2021 | 224.4761197 | 346.4561607 | 137.2652508 | 1.17(0.97-1.36) |
| 34 | 2 | DALYs (Disability-Adjusted Life Years) | 95 | United Kingdom of Great Britain and Northern Ireland | 2 | Female | 24 | 15-49 years | 532 | Inflammatory bowel disease | 3 | Rate | 2021 | 35.35154878 | 47.08754002 | 25.79192726 | Number | 2021 | 5422.761719 | 7223.007712 | 3956.360631 | -0.44(-0.63--0.25) |
| 116 | 2 | DALYs (Disability-Adjusted Life Years) | 130 | United Mexican States | 2 | Female | 24 | 15-49 years | 532 | Inflammatory bowel disease | 3 | Rate | 2021 | 7.150225273 | 8.296984058 | 6.023157 | Number | 2021 | 2505.724005 | 2907.594003 | 2110.754348 | 1.98(1.76-2.20) |
| 33 | 2 | DALYs (Disability-Adjusted Life Years) | 189 | United Republic of Tanzania | 2 | Female | 24 | 15-49 years | 532 | Inflammatory bowel disease | 3 | Rate | 2021 | 7.589706055 | 11.68073299 | 4.702062379 | Number | 2021 | 1127.789991 | 1735.694855 | 698.7014844 | 0.52(0.34-0.71) |
| 18 | 2 | DALYs (Disability-Adjusted Life Years) | 102 | United States of America | 2 | Female | 24 | 15-49 years | 532 | Inflammatory bowel disease | 3 | Rate | 2021 | 38.66961599 | 51.76646462 | 28.53022571 | Number | 2021 | 29278.37029 | 39194.53765 | 21601.41733 | 0.25(0.02-0.48) |
| 118 | 2 | DALYs (Disability-Adjusted Life Years) | 422 | United States Virgin Islands | 2 | Female | 24 | 15-49 years | 532 | Inflammatory bowel disease | 3 | Rate | 2021 | 20.44208934 | 31.37562891 | 12.48174684 | Number | 2021 | 3.516441736 | 5.39722575 | 2.147106138 | -0.94(-1.22--0.66) |

| **Supplement Table 6. Projected Trends in Incidence, Death, and DALYs of Inflammatory Bowel Disease from 2021 to 2030 in Women of Reproductive Age.** | | | | | | |
| --- | --- | --- | --- | --- | --- | --- |
| Year | Incidence per 100 000 population | Incidence case | Death per 100 000 population | Death case | DALYs per 100 000 population | DALYs |
|
|
| 2021 | 5.078622 | 98975 | 0.132745 | 2587 | 14.448482 | 281580 |
| 2022 | 4.920188 | 98247 | 0.132311 | 2642 | 14.185649 | 283261 |
| 2023 | 4.865858 | 97794 | 0.1326 | 2665 | 14.104588 | 283474 |
| 2024 | 4.811378 | 97331 | 0.132876 | 2688 | 14.023444 | 283685 |
| 2025 | 4.763033 | 96980 | 0.132852 | 2705 | 13.949085 | 284017 |
| 2026 | 4.714107 | 96600 | 0.132786 | 2721 | 13.872894 | 284279 |
| 2027 | 4.664312 | 96179 | 0.132734 | 2737 | 13.794052 | 284436 |
| 2028 | 4.614174 | 95736 | 0.132638 | 2752 | 13.71374 | 284536 |
| 2029 | 4.563999 | 95276 | 0.132547 | 2767 | 13.632645 | 284589 |
| 2030 | 4.513497 | 94773 | 0.132443 | 2781 | 13.549492 | 284508 |
